# Supplementary material for: A one-pot synthesis of hydrophilic poly(glycerol methacrylate) chitosan for highly selective enrichment of glycopeptides
Source: Royal Society of Chemistry journal article supplement (doi:10.1039/c9cc08016c), 2019-12-11
Supplement: c9cc08016c2.xlsx [file c9cc08016c2.xlsx]

## Sheet: Sheet1
Table S6. Identified N-glycopeptides containing deamidated Asn within N-X-S/T from 45μg mouse liver protein digest. n denotes the N-linked lycosylation site ( with a total of LC-MS/MS run time of 120 mins). L1, L2 and L3 represent the three replicate experiments respectively.
No.	Protein Group Accessions	No.	Sequence	Modifications	MH+ [Da]	q-Value	PEP	L1	XCorr L1	L2	XCorr L2	L3	XCorr L3	# Missed Cleavages
1	A0A075B5P4	Ig gamma-1 chain C region, membrane-bound form (Fragment) OS=Mus musculus GN=Ighg1 PE=4 SV=1 - [A0A075B5P4_MOUSE]	EEQInSTFR	N5(Deamidated)	1124.53	0.001	0.003174	High	1.92146	High	2.1971	High	1.9127	0
2	A0A075B6A3	Protein Igha (Fragment) OS=Mus musculus GN=Igha PE=4 SV=1 - [A0A075B6A3_MOUSE]	LSGKPTnVSVSVIMSEGDGICY	N7(Deamidated); M14(Oxidation); C21(Carbamidomethyl)	2330.1	0	3.468e-08	High	4.46097	High	5.34601	High	5.47645	0
			QGDQYSCMVGHEALPMnFTQK	C7(Carbamidomethyl); M8(Oxidation); M16(Oxidation); N17(Deamidated)	2474.05	0	0.001071	High	2.96276	High	2.14299	High	3.12506	0
			LSGKPTnVSVSVIMSEGDGICY	N7(Deamidated); C21(Carbamidomethyl)	2314.1	0	0.00965	High	3.80098					0
			ALSSDPVIIGCLIHDYFPSGTMnVTWGK	C11(Carbamidomethyl); M22(Oxidation); N23(Deamidated)	3095.5	0	0.001071					High	3.10257	0
3	A0A087WNL6	Collagen alpha-5(VI) chain OS=Mus musculus GN=Col6a5 PE=4 SV=1 - [A0A087WNL6_MOUSE]	DLQnFLEnVTSSVDVK	N8(Deamidated)	1808.91	0	4.6e-11	High	3.49639	High	4.35111	High	4.67876	0
			YQEIIELESSLnK(T)	N12(Deamidated)	1566.8	0	0.005688	High	3.47636					0
			SSAnQSEFQQQIQK	N4(Deamidated)	1623.76	0	0.0001881					High	4.5213	0
4	A0A087WP12	Sialomucin core protein 24 (Fragment) OS=Mus musculus GN=Cd164 PE=4 SV=1 - [A0A087WP12_MOUSE]	TYCAnEPLSnCSQVnR	C3(Carbamidomethyl); N10(Deamidated); C11(Carbamidomethyl); N15(Deamidated)	1914.8	0	3.98e-09	High	4.15127	High	4.61985	High	5.12182	0
			TYCAnEPLSnCSQVnR	C3(Carbamidomethyl); N10(Deamidated); C11(Carbamidomethyl)	1913.81	0	0.0002445	High	2.63894	High	2.58992	High	3.07218	0
			TYCAnEPLSnCSQVnR	C3(Carbamidomethyl); N10(Deamidated); C11(Carbamidomethyl); Q13(Deamidated); N15(Deamidated)	1915.78	0	7.312e-06	High	3.39267	High	3.74526			0
5	A0A0A6YVT1	Complement component receptor 1-like protein (Fragment) OS=Mus musculus GN=Cr1l PE=4 SV=1 - [A0A0A6YVT1_MOUSE]	InYTCnQGYR	N2(Deamidated); C5(Carbamidomethyl)	1289.56	0	0.0008353	High	2.8235	High	2.92844	High	2.88291	0
			CTPPPYVEnAVMLSEnR(S)	C1(Carbamidomethyl); M12(Oxidation); N16(Deamidated)	1993.91	0	0.0003791	High	2.51316	High	2.01502	High	2.40519	0
			InYTCnQGYR	N2(Deamidated); C5(Carbamidomethyl); N6(Deamidated)	1290.54	0	0.02058	High	2.83436	High	2.93398			0
6	A0A0A6YWC0	Sodium-coupled neutral amino acid transporter 3 (Fragment) OS=Mus musculus GN=Slc38a3 PE=4 SV=1 - [A0A0A6YWC0_MOUSE]	FQVPCPLAHnLAnATGnFSHMVVAEEK	C5(Carbamidomethyl); N10(Deamidated); N13(Deamidated); M21(Oxidation)	2999.41	0	8.349e-06			High	4.03421	High	3.68885	0
			FQVPCPLAHnLAnATGnFSHMVVAEEK	C5(Carbamidomethyl); N10(Deamidated); N13(Deamidated); N17(Deamidated); M21(Oxidation)	3000.41	0.003	0.1414	High	2.72606					0
5	A0A0A6YWH7	Antithrombin-III (Fragment) OS=Mus musculus GN=Serpinc1 PE=4 SV=1 - [A0A0A6YWH7_MOUSE]	VTInnWVAnK(T)	N9(Deamidated)	1159.61	0	0.0001457	High	2.70124	High	3.12484	High	2.67129	0
			SLTFnESYQDVSEVVYGAK	N5(Deamidated)	2137	0	5.55e-05	High	3.89933	High	4.27459	High	4.49166	0
			LGACnDTLK	C4(Carbamidomethyl); N5(Deamidated)	992.476	0	0.02033	High	3.15567	High	2.76601	High	2.7633	0
			GETASLLCnISVR	C8(Carbamidomethyl); N9(Deamidated)	1420.72	0	0.001729	High	4.01196	High	3.60311	High	3.56093	0
7	A0A0A6YWP3	Solute carrier family 26 member 6 OS=Mus musculus GN=Slc26a6 PE=4 SV=1 - [A0A0A6YWP3_MOUSE]	AFVQGLnATADDAR	N7(Deamidated)	1449.69	0	0.002024			High	2.58434			0
8	A0A0B4J1E4	G-protein-coupled receptor 39 OS=Mus musculus GN=Gpr39 PE=4 SV=1 - [A0A0B4J1E4_MOUSE]	GLnCnLSR	C4(Carbamidomethyl); N5(Deamidated)	934.444	0.003	0.06903			High	1.85778	High	1.73274	0
9	A0A0B4J1G0	Fc of IgG, low affinity IIIa, receptor OS=Mus musculus GN=Fcgr4 PE=4 SV=1 - [A0A0B4J1G0_MOUSE]	ATHnDSGSYFCR	N4(Deamidated); C11(Carbamidomethyl)	1415.57	0	0.001071	High	2.81809	High	3.15377	High	3.179	0
10	A2A4I8	Membrane primary amine oxidase (Fragment) OS=Mus musculus GN=Aoc3 PE=3 SV=1 - [A2A4I8_MOUSE]	YLYLASnHSnK	N7(Deamidated)	1310.64	0	0.0001082	High	2.74442	High	2.75545	High	2.68099	0
11	A2A5K8	Matrix metalloproteinase-9 (Fragment) OS=Mus musculus GN=Mmp9 PE=4 SV=1 - [A2A5K8_MOUSE]	TSnLTDTQLAEAYLYR	N3(Deamidated)	1859.9	0	6.82e-06			High	3.51907	High	3.48753	0
12	A2AAA9	C-type mannose receptor 2 OS=Mus musculus GN=Mrc2 PE=4 SV=1 - [A2AAA9_MOUSE]	KKPnATVEPIQPDR	N4(Deamidated)	1593.86	0	0.009737	High	2.91358	High	2.56466			1
			ASnASKPGTLER	N3(Deamidated)	1231.63	0.001	0.01541			High	2.18374	High	1.94994	0
			VTPVCnASLPAQR	C5(Carbamidomethyl); N6(Deamidated)	1413.72	0	0.01093	High	2.76057					0
13	A2AIJ2	CD82 antigen (Fragment) OS=Mus musculus GN=Cd82 PE=4 SV=1 - [A2AIJ2_MOUSE]	nYTAnATSSR	N5(Deamidated)	1085.49	0	0.01723	High	2.93484	High	2.64772	High	2.60085	0
			nYTAnATSSR	N1(Deamidated); N5(Deamidated)	1086.47	0	0.01142	High	3.15542	High	2.88707	High	2.99587	0
14	A2AKI5	Integrin alpha-V OS=Mus musculus GN=Itgav PE=3 SV=1 - [A2AKI5_MOUSE]	IKTPEKnDTAAAGQGER	N7(Deamidated)	1786.9	0	1.199e-05	High	2.61227	High	4.20485	High	3.92529	2
			TPEKnDTAAAGQGER	N5(Deamidated)	1545.72	0	0.0008353	High	1.2638	High	2.81826	High	2.19246	1
			AnTTQPGIVEGGQVLK	N2(Deamidated)	1612.86	0	6.543e-07	High	2.99634	High	3.34721	High	3.79801	0
			TAADATGLQPILnQFTPAnVSR	N19(Deamidated)	2286.18	0	9.528e-05	High	4.79899	High	5.19885	High	4.46103	0
			EnQnHSYSLK	N4(Deamidated)	1220.56	0.001	0.01854			High	2.20383	High	2.15221	0
15	A2AMH3	Choline transporter-like protein 1 OS=Mus musculus GN=Slc44a1 PE=4 SV=1 - [A2AMH3_MOUSE]	FAEInGSALCSYnIKPSEYTLTSK	N5(Deamidated); C10(Carbamidomethyl)	2694.31	0	9.769e-05	High	2.52088	High	3.5512	High	4.48844	0
			CAPVnISCYAK	C1(Carbamidomethyl); N5(Deamidated); C8(Carbamidomethyl)	1283.58	0.002	0.1182	High	2.15142					0
16	A2AQ56	Transmembrane protein 62 OS=Mus musculus GN=Tmem62 PE=4 SV=1 - [A2AQ56_MOUSE]	nYSnGTHTIEVFVQDSAGR	N4(Deamidated)	2095.98	0	0.000291	High	4.09547	High	4.66235	High	4.0208	0
17	A2ARA8	Integrin alpha-8 OS=Mus musculus GN=Itga8 PE=1 SV=1 - [ITA8_MOUSE]	ILnCTnIDCLQISCAVGR	N3(Deamidated); C4(Carbamidomethyl); C9(Carbamidomethyl); C14(Carbamidomethyl)	2108	0	0.04355	High	1.91958					0
18	A2AS37	Protein AI182371 OS=Mus musculus GN=AI182371 PE=4 SV=2 - [A2AS37_MOUSE]	LEIVPIIYDnDSLFVQTDK	N10(Deamidated)	2223.16	0	1.167e-05	High	5.54001	High	3.69559	High	3.78358	0
			ETVLTFIDPEGSQVDTIEGnnLTGIASFPDFEIPSnPK	N20(Deamidated)	4093	0.001	0.01012					High	2.83892	0
19	A2ATR8	Plasma protease C1 inhibitor OS=Mus musculus GN=Serping1 PE=3 SV=1 - [A2ATR8_MOUSE]	DTYVnASQSLYGSSPR	N5(Deamidated)	1745.8	0	0.0001674	High	4.55358	High	4.38436	High	3.71961	0
20	A2AWF8	Protein-tyrosine-phosphatase OS=Mus musculus GN=Ptprj PE=4 SV=1 - [A2AWF8_MOUSE]	TGDGSnVTSnFTK	N6(Deamidated); N10(Deamidated)	1329.58	0	5.18e-07	High	3.90838	High	4.12372	High	2.93961	0
			TnSTQVSDVR	N2(Deamidated)	1107.54	0	0.004396	High	3.58814	High	3.75299	High	3.00307	0
			GPDGTEGLSSTVnGSTDPSAVTDIR	N13(Deamidated)	2434.12	0	7.781e-09	High	4.20523	High	4.15538	High	4.14107	0
			IHVAGGTHSVnQTVnK	N11(Deamidated); N15(Deamidated)	1663.84	0	2.241e-09	High	3.89344	High	2.9977	High	3.41989	0
			nASTGnQSYMVEDLKPGTSYHFEIIPR	N1(Deamidated); M10(Oxidation)	3071.46	0	0.002243			High	2.65976			0
			MALPAQnICTTGITDPPTPDGSPnITSVSHnSVK	M1(Oxidation); N7(Deamidated); C9(Carbamidomethyl); N24(Deamidated)	3538.68	0	0.002516			High	2.44384			0
			TGDGSnVTSnFTKDPSILIPELIPGVSYTVK	N6(Deamidated); N10(Deamidated)	3251.68	0	0.0008353					High	3.03067	1
21	A2BDV6	Alpha-galactosidase A (Fragment) OS=Mus musculus GN=Gla PE=3 SV=1 - [A2BDV6_MOUSE]	LGIYADVGnK(T)	N9(Deamidated)	1050.55	0	0.0008353	High	2.55914	High	2.45715	High	2.44652	0
22	A6H6E2	Multimerin-2 OS=Mus musculus GN=Mmrn2 PE=2 SV=1 - [MMRN2_MOUSE]	nLSLDVEAnHQAIK	N1(Deamidated)	1552.8	0.001	0.008497			High	2.42107			0
23	A6PWZ9	Solute carrier family 43 member 3 (Fragment) OS=Mus musculus GN=Slc43a3 PE=4 SV=1 - [A6PWZ9_MOUSE]	AEnYFSEPCEQDCLLQSnVTGPSDLK	C9(Carbamidomethyl); Q11(Deamidated); C13(Carbamidomethyl); N18(Deamidated)	3003.31	0.001	0.02159			High	2.06218			0
24	A6X935-2	Isoform 2 of Inter alpha-trypsin inhibitor, heavy chain 4 OS=Mus musculus GN=Itih4 - [ITIH4_MOUSE]	AFITnFSMIIDGVTYPGVVK	N5(Deamidated); M8(Oxidation)	2189.13	0	6.183e-07	High	3.12356	High	4.47079	High	4.23196	0
			ISASGAELEALEAQVLnLSLK	N17(Deamidated)	2157.18	0	7.926e-10	High	5.42735	High	5.78177	High	4.68523	0
			KAFITnFSMIIDGVTYPGVVK	N6(Deamidated); M9(Oxidation)	2317.23	0	4.482e-06			High	3.39602	High	3.91538	1
			GLMLLLnDTQHFSnnVK	M3(Oxidation); N7(Deamidated)	1960.98	0.001	0.02278			High	2.12734	High	1.47975	0
25	A9C437	Chloride channel protein OS=Mus musculus GN=Clcn2 PE=3 SV=1 - [A9C437_MOUSE]	ETLVTLFDnR(T)	N9(Deamidated)	1208.62	0	0.000356	High	2.44329	High	2.66177	High	2.14451	0
			RGPSnSTSLQEGTTGnMESAGIALR	N5(Deamidated); M17(Oxidation)	2551.21	0.001	0.012			High	2.47776			1
26	B0R0N4	Large neutral amino acids transporter small subunit 3 (Fragment) OS=Mus musculus GN=Slc43a1 PE=4 SV=1 - [B0R0N4_MOUSE]	EGFYSSLCPAEnR(T)	C8(Carbamidomethyl); N12(Deamidated)	1530.66	0	0.02205	High	3.11371	High	2.51306			0
27	B1AU41	Alpha-1B adrenergic receptor (Fragment) OS=Mus musculus GN=Adra1b PE=3 SV=1 - [B1AU41_MOUSE]	DAnFTGPnQTSSnSTLPQLDVTR	N3(Deamidated); N8(Deamidated); N13(Deamidated)	2466.13	0	0.00633	High	3.08517	High	3.32652			0
			DAnFTGPnQTSSnSTLPQLDVTR	N8(Deamidated); N13(Deamidated)	2465.15	0.001	0.002937			High	2.09243	High	2.6574	0
28	B1AW62	Thyroxine-binding globulin (Fragment) OS=Mus musculus GN=Serpina7 PE=4 SV=1 - [B1AW62_MOUSE]	VTTCHLPQQnATLYK	C4(Carbamidomethyl); N10(Deamidated)	1774.88	0	0.03827	High	2.78937	High	3.11997	High	3.41356	0
29	B1AZA8	Transmembrane protein 245 (Fragment) OS=Mus musculus GN=Tmem245 PE=4 SV=1 - [B1AZA8_MOUSE]	ILGDKVnnTAVIEK	N8(Deamidated)	1514.84	0	0.0007345	High	3.779	High	3.93985	High	3.51873	1
30	B2RRC9	Coagulation factor VIII OS=Mus musculus GN=F8 PE=2 SV=1 - [B2RRC9_MOUSE]	DKETnSEGLVnK(T)	N11(Deamidated)	1334.65	0.001	0.02227			High	1.94066			1
31	B2RT14	MCG14318, isoform CRA_h OS=Mus musculus GN=Ugt1a5 PE=2 SV=1 - [B2RT14_MOUSE]	nMSTVLLK	N1(Deamidated); M2(Oxidation)	922.493	0	0.003454	High	2.51146	High	2.37221	High	2.4068	0
32	B2RU80	Receptor-type tyrosine-protein phosphatase beta OS=Mus musculus GN=Ptprb PE=1 SV=1 - [PTPRB_MOUSE]	IDnFTYGCnPK	N3(Deamidated); C8(Carbamidomethyl)	1329.58	0	0.0001318			High	2.98786			0
			LYnVTVTTK	N3(Deamidated)	1039.57	0.006	0.1195			High	1.75311			0
			SFPVYInGSTVPSPVK	N7(Deamidated)	1692.89	0	0.005216	High	3.71064			High	3.40928	0
33	B2RXS4	Plexin-B2 OS=Mus musculus GN=Plxnb2 PE=1 SV=1 - [PLXB2_MOUSE]	LQVTLYnCSFGR	N7(Deamidated); C8(Carbamidomethyl)	1458.71	0	0.0002682	High	2.72713	High	2.95017	High	3.21945	0
			LSHDGnETLPLHLYVK	N6(Deamidated)	1836.96	0	6.732e-12	High	4.39853	High	4.47719	High	4.70206	0
			SInVTGQGFSLIQK	N3(Deamidated)	1492.81	0	2.754e-07	High	4.4732	High	4.81571	High	4.64166	0
			TEAGVFEYVADPTFEnFTGGVK	N16(Deamidated)	2379.12	0	3.688e-07	High	3.84469	High	4.12084	High	4.43008	0
			VVFLSPAVPEEPEAYnLTVLIR	N16(Deamidated)	2457.34	0	7.043e-09	High	3.35675	High	3.76106	High	3.97872	0
			QGPQAGGTTLTInGTHLDTGSK	N13(Deamidated)	2155.07	0	7.704e-07	High	2.34631	High	3.50411	High	3.7234	0
			SCVAITDAFPQnMSR	C2(Carbamidomethyl); N12(Deamidated); M13(Oxidation)	1713.76	0	0.005263	High	3.86964	High	4.0151	High	3.24917	0
			CVYEALCSnVTSECPPPVITR	C1(Carbamidomethyl); C7(Carbamidomethyl); N9(Deamidated); C14(Carbamidomethyl)	2453.13	0	5.303e-09	High	3.07326	High	4.06705	High	4.30037	0
			IKQDLALSGnLSSLYAMTQDK	N10(Deamidated); M17(Oxidation)	2313.17	0	0.0002713	High	1.99005	High	4.0559			1
			GGLnLTAVTVTAEnDHTVAFLGTSDGR	N4(Deamidated)	2717.36	0	0.0003509			High	2.6215	High	3.72962	0
			AMSnISVR	M2(Oxidation); N4(Deamidated)	894.435	0.001	0.01056			High	1.87208	High	1.87678	0
			GGLnLTAVTVTAEnDHTVAFLGTSDGR	N4(Deamidated); N14(Deamidated)	2718.33	0	0.002282			High	2.21183			0
			SCVAITDAFPQnMSR	C2(Carbamidomethyl); N12(Deamidated)	1697.77	0	0.006828	High	3.45257					0
34	B5THE2	Maltase-glucoamylase OS=Mus musculus GN=Mgam PE=2 SV=1 - [B5THE2_MOUSE]	FSVnQTTLLTHEK	N4(Deamidated)	1518.78	0	0.0002753	High	3.69163	High	3.2436	High	3.47111	0
			VILILDPAISGnETEPYPAFTR	N12(Deamidated)	2417.27	0	7.495e-07	High	3.77962	High	4.34965	High	3.94997	0
			EEERIDCYPDEHGASEAnCSAR	C7(Carbamidomethyl); N18(Deamidated); C19(Carbamidomethyl)	2596.05	0	3.573e-05	High	3.1792	High	3.33057	High	3.33658	1
			IDCYPDEHGASEAnCSAR	C3(Carbamidomethyl); N14(Deamidated); C15(Carbamidomethyl)	2052.8	0	9.491e-05	High	3.34228	High	3.28755	High	3.42462	0
			LVIILDPAISnnSFSSnPYGPYDR	N11(Deamidated)	2653.33	0	0.0004971			High	3.0847			0
			DQDPASFGnnSLLLnSSR	N10(Deamidated); N15(Deamidated)	1936.9	0	0.006605	High	3.75707					0
35	B7ZNJ1	Fibronectin OS=Mus musculus GN=Fn1 PE=2 SV=1 - [B7ZNJ1_MOUSE]	LDAPTnLQFVnETDR	N11(Deamidated)	1733.84	0	3.694e-06	High	4.36033	High	4.11053	High	3.02454	0
			nYTDCTSEGR	N1(Deamidated); C5(Carbamidomethyl)	1203.46	0	0.001071	High	3.14963	High	2.81414	High	3.34625	0
			DQCIVDDITYnVnDTFHK	C3(Carbamidomethyl); N13(Deamidated)	2197.98	0	0.0003008	High	4.32094	High	4.60913	High	4.47274	0
			RHEEGHMLnCTCFGQGR	M7(Oxidation); N9(Deamidated); C10(Carbamidomethyl); C12(Carbamidomethyl)	2105.87	0	0.001088	High	1.62687	High	2.4689			1
			HEEGHMLnCTCFGQGR	M6(Oxidation); N8(Deamidated); C9(Carbamidomethyl); C11(Carbamidomethyl)	1949.78	0	1.033e-06			High	2.67443	High	3.67772	0
36	B7ZNP0	alpha-1,2-Mannosidase OS=Mus musculus GN=Edem3 PE=2 SV=1 - [B7ZNP0_MOUSE]	LLPAFnTTSGLPYPR	N6(Deamidated)	1647.88	0	4.619e-05	High	2.78301	High	2.21698	High	3.00608	0
37	B8JJ81	JNK1/MAPK8-associated membrane protein (Fragment) OS=Mus musculus GN=Jkamp PE=4 SV=1 - [B8JJ81_MOUSE]	nGSSEIYGECGVCPR	N1(Deamidated); C10(Carbamidomethyl); C13(Carbamidomethyl)	1685.69	0.001	0.01161			High	1.98996			0
38	B8JJN2;F6VQX8	Complement C2 OS=Mus musculus GN=C2 PE=3 SV=1 - [B8JJN2_MOUSE]	LTDTICGVGnMSAnASDQER	C6(Carbamidomethyl); N10(Deamidated); M11(Oxidation); N14(Deamidated)	2156.91	0	1.938e-08	High	2.552	High	3.47126			0
39	B8JK39	Integrin alpha-9 OS=Mus musculus GN=Itga9 PE=1 SV=1 - [ITA9_MOUSE]	VLnLTDnTYFK	N3(Deamidated)	1328.68	0	8.085e-05	High	2.94749	High	3.14536	High	3.02645	0
			nVPGEIGLnYnLTADVAQK	N11(Deamidated)	2017.03	0	3.476e-11	High	3.7673	High	4.18067	High	4.31044	0
40	D3YWD1	Protein Col6a3 (Fragment) OS=Mus musculus GN=Col6a3 PE=4 SV=2 - [D3YWD1_MOUSE]	ALnGSALYTGSSLDFVR	N3(Deamidated)	1771.89	0	0.0004537	High	4.58262	High	4.36798			0
41	D3YXU8	Hyaluronidase OS=Mus musculus GN=Hyal1 PE=3 SV=1 - [D3YXU8_MOUSE]	EQSFQGSnMTIFYR	N8(Deamidated); M9(Oxidation)	1724.76	0	0.0002679			High	2.32224	High	2.20453	0
42	D3YYN2	All-trans retinoic acid-induced differentiation factor (Fragment) OS=Mus musculus GN=Atraid PE=4 SV=2 - [D3YYN2_MOUSE]	GTILGLDLQnCSLK	N10(Deamidated); C11(Carbamidomethyl)	1532.81	0	1.42e-05	High	3.60802	High	3.51882	High	3.30582	0
43	D3YYT0	Cadherin-2 OS=Mus musculus GN=Cdh2 PE=4 SV=1 - [D3YYT0_MOUSE]	SnISILR	N2(Deamidated)	803.464	0.003	0.0211	High	2.12185	High	1.83582	High	2.10511	0
44	D3Z0Q9	Sodium/hydrogen exchanger (Fragment) OS=Mus musculus GN=Slc9a6 PE=3 SV=1 - [D3Z0Q9_MOUSE]	YGIHVPSDVnnVTLSCEVQSSPTTLLVnVSGK	N11(Deamidated); C16(Carbamidomethyl); N28(Deamidated)	3416.71	0	0.02744	High	3.2965			High	2.81933	0
45	D3Z2V4	Scavenger receptor class B member 1 OS=Mus musculus GN=Scarb1 PE=4 SV=1 - [D3Z2V4_MOUSE]	ESGIQnVSTCR	N6(Deamidated); C10(Carbamidomethyl)	1251.56	0	0.004956	High	2.54552	High	2.50052	High	2.22703	0
			FTAPDTLFAnGSVYPPnEGFCPCR	N10(Deamidated); C21(Carbamidomethyl); C23(Carbamidomethyl)	2718.21	0	3.636e-06	High	3.8877	High	4.48822	High	4.1322	0
			EHSLFLDIHPVTGIPMnCSVK	M16(Oxidation); N17(Deamidated); C18(Carbamidomethyl)	2411.18	0	0.000197			High	2.52067	High	2.28992	0
			LTYnESR	N4(Deamidated)	883.416	0.005	0.08391					High	1.24162	0
			FGLFVGMnnSnSGVFTVFTGVQnFSR	M7(Oxidation); N11(Deamidated); N23(Deamidated)	2844.35	0	0.001071					High	3.06704	0
46	D3Z354	Zinc transporter ZIP14 (Fragment) OS=Mus musculus GN=Slc39a14 PE=4 SV=1 - [D3Z354_MOUSE]	YGKnDSLTLTQLK	N4(Deamidated)	1481.79	0	0.001413	High	4.55197	High	3.99277	High	4.51739	1
			nLSTCFSSGDLFAAHnLSER	N1(Deamidated); C5(Carbamidomethyl); N16(Deamidated)	2228	0	1.265e-09	High	4.78531	High	5.05641	High	5.03805	0
			SLLDHLHVGVGRDnVSQPK	N14(Deamidated)	2072.1	0	4.426e-12			High	4.62546	High	5.64367	1
47	D3Z3A3	SPARC-related modular calcium-binding protein 1 OS=Mus musculus GN=Smoc1 PE=4 SV=1 - [D3Z3A3_MOUSE]	DSKLnnTnVR	N5(Deamidated)	1161.59	0.001	0.01214	High	1.93879			High	2.42668	1
48	D3Z4W4	Sulfate anion transporter 1 (Fragment) OS=Mus musculus GN=Slc26a1 PE=4 SV=1 - [D3Z4W4_MOUSE]	nnDSTLnnSATTLIIGLQDCR	N2(Deamidated); N7(Deamidated); C20(Carbamidomethyl)	2322.1	0	7.061e-11	High	5.49569	High	4.96716	High	4.71664	0
49	D3Z521	Coagulation factor X OS=Mus musculus GN=F10 PE=4 SV=1 - [D3Z521_MOUSE]	SVALnTSDSELDLEDALLDEDFLSPTEnPIELLnLnETQPER	N28(Deamidated); N34(Deamidated)	4701.23	0.004	0.0672					High	1.76113	0
50	D3Z5E7	Sodium/potassium/calcium exchanger 6, mitochondrial (Fragment) OS=Mus musculus GN=Slc8b1 PE=4 SV=4 - [D3Z5E7_MOUSE]	AVCGLnTSDR	C3(Carbamidomethyl); N6(Deamidated)	1093.5	0	0.0005741	High	2.53377	High	2.55257	High	2.41982	0
51	D3Z5U5	P2X purinoceptor (Fragment) OS=Mus musculus GN=P2rx4 PE=3 SV=1 - [D3Z5U5_MOUSE]	GVAVTnTSQLGFR	N6(Deamidated)	1350.7	0	0.0007438	High	4.51138	High	4.24438	High	3.70225	0
			AAEnFTLLVK	N4(Deamidated)	1106.61	0	0.0008353	High	2.57956	High	3.36242	High	3.31935	0
			TSICDSDAnCTLGSSDTHSSGIGTGR	C4(Carbamidomethyl); N9(Deamidated); C10(Carbamidomethyl)	2657.11	0	1.335e-09	High	3.89312	High	2.90513	High	3.59677	0
			nILPnITTSYLK	N5(Deamidated)	1377.77	0	0.007264	High	2.8714	High	2.72691			0
52	D3Z5Y0	Endothelial cell-selective adhesion molecule (Fragment) OS=Mus musculus GN=Esam PE=4 SV=1 - [D3Z5Y0_MOUSE]	VLVPPAPPSCSLQGVPYVGTnVTLnCK	C10(Carbamidomethyl); N21(Deamidated); C26(Carbamidomethyl)	2868.47	0	0.0004055	High	2.42692	High	2.91581			0
			CnVTLDVMTGSK	C1(Carbamidomethyl); N2(Deamidated); M8(Oxidation)	1341.6	0.006	0.09933			High	1.76098			0
53	D3Z665	ER membrane protein complex subunit 10 (Fragment) OS=Mus musculus GN=Emc10 PE=4 SV=1 - [D3Z665_MOUSE]	GSEVEDEDLELFnTSVQLRPPSTAPGPETAAFIER	N13(Deamidated)	3802.86	0	1.705e-09	High	5.2423	High	5.72063	High	5.11803	0
			GSEVEDEDLELFnTSVQLRPPSTAPGPETAAFIER	N13(Deamidated); Q17(Deamidated)	3803.85	0.001	0.008343			High	3.22278			0
54	D6REF0	Torsin-1B OS=Mus musculus GN=Tor1b PE=4 SV=1 - [D6REF0_MOUSE]	FTECCHEERPLnTSALK	C4(Carbamidomethyl); C5(Carbamidomethyl); N12(Deamidated)	2092.95	0	0.0002755	High	3.09511	High	3.29445	High	3.95553	0
55	D6RGM8	Transmembrane 9 superfamily member 1 OS=Mus musculus GN=Tm9sf1 PE=4 SV=1 - [D6RGM8_MOUSE]	IIFAnVSVR	N5(Deamidated)	1019.59	0	0.03163	High	2.54548	High	2.52883	High	2.53075	0
56	D6RH54	Solute carrier family 22 member 5 OS=Mus musculus GN=Slc22a5 PE=4 SV=1 - [D6RH54_MOUSE]	LATIAnFSELGLEPGR	N6(Deamidated)	1688.9	0	0.002531	High	4.09443	High	3.8997	High	3.25258	0
			nHSIPLETK	N1(Deamidated)	1039.54	0.001	0.003617			High	2.44132	High	2.19786	0
57	D6RI72	Probable C-mannosyltransferase DPY19L4 OS=Mus musculus GN=Dpy19l4 PE=4 SV=1 - [D6RI72_MOUSE]	GVYELTHnnK(T)	N9(Deamidated)	1175.57	0	0.004421					High	1.75197	0
58	E0CXC7	SID1 transmembrane family member 2 (Fragment) OS=Mus musculus GN=Sidt2 PE=4 SV=1 - [E0CXC7_MOUSE]	TGELFTFnTTAAQPQYFK	N8(Deamidated)	2065	0	9.053e-18	High	5.7889	High	4.71285	High	5.88156	0
			TYADDVnSELVnIYTFnHTVTR	N17(Deamidated)	2573.22	0	3.563e-07	High	3.86659	High	4.41445	High	3.67866	0
59	E0CXJ2	Seipin OS=Mus musculus GN=Bscl2 PE=4 SV=1 - [E0CXJ2_MOUSE]	TDCDSSTASLCSFPVAnVSLAK	C3(Carbamidomethyl); C11(Carbamidomethyl); N17(Deamidated)	2331.06	0	0.0005831	High	4.2628					0
60	E0CXN0	Hepatocyte growth factor-like protein OS=Mus musculus GN=Mst1 PE=3 SV=1 - [E0CXN0_MOUSE]	GTTnTTSAGVPCQR	N4(Deamidated); C12(Carbamidomethyl)	1450.66	0	6.355e-05	High	2.07786	High	2.97495	High	2.54928	0
61	E0CY66	Claudin domain containing 1, isoform CRA_c OS=Mus musculus GN=Cldnd1 PE=4 SV=1 - [E0CY66_MOUSE]	SPIQEnSSDSnK	N6(Deamidated)	1306.58	0	0.00114					High	2.36032	0
62	E0CYN0	Alkylglycerol monooxygenase OS=Mus musculus GN=Agmo PE=4 SV=1 - [E0CYN0_MOUSE]	SPGAQDnVSVSQGMR	N7(Deamidated); M14(Oxidation)	1549.69	0	2.868e-06	High	2.87546	High	3.74208	High	3.80965	0
			SPGAQDnVSVSQGMR	N7(Deamidated)	1533.7	0	0.003253	High	3.89275	High	2.04419			0
63	E0CZA5	Neurexin-1 OS=Mus musculus GN=Nrxn1 PE=4 SV=1 - [E0CZA5_MOUSE]	VnSSQALPVDGGEVK	N2(Deamidated)	1500.76	0	0.01689	High	3.0044					0
64	E9PV38	Protein Ces2g OS=Mus musculus GN=Ces2g PE=3 SV=1 - [E9PV38_MOUSE]	LnLTEEEK	N2(Deamidated)	976.486	0	0.001715	High	2.95819	High	2.73705	High	2.4015	0
			DGTSQPAICPQnVTMnMEGLK	C9(Carbamidomethyl); M15(Oxidation); N16(Deamidated); M17(Oxidation)	2324.03	0	0.001741	High	1.95068	High	2.73111	High	3.19177	0
65	E9PVI4	Netrin receptor UNC5C OS=Mus musculus GN=Unc5c PE=4 SV=1 - [E9PVI4_MOUSE]	LSDTAnYTCVAK	N6(Deamidated); C9(Carbamidomethyl)	1343.63	0.002	0.1274	High	2.15222					0
66	E9PWD8	Golgi apparatus protein 1 OS=Mus musculus GN=Glg1 PE=4 SV=1 - [E9PWD8_MOUSE]	GnITEYQCHQYITK	N2(Deamidated); C8(Carbamidomethyl)	1755.8	0	7.67e-07	High	4.00312	High	3.66177	High	4.24203	0
			LnLTTDPK	N2(Deamidated)	902.485	0	0.004515	High	2.4392	High	2.2144	High	2.92599	0
67	E9PWK4	Immunoglobulin J chain (Fragment) OS=Mus musculus GN=Igj PE=4 SV=4 - [E9PWK4_MOUSE]	EnISDPTSPLR	N2(Deamidated)	1229.6	0	0.007507	High	2.97359	High	2.71863	High	2.76157	0
			IVVPLnnREnISDPTSPLR	N10(Deamidated)	2135.15	0	0.02427	High	3.9122	High	2.95623	High	2.83162	1
68	E9PWK7	Receptor protein-tyrosine kinase OS=Mus musculus GN=Ephb4 PE=4 SV=1 - [E9PWK7_MOUSE]	SVVHHLnGSTLR	N7(Deamidated)	1320.7	0	0.0001685	High	2.17191	High	2.78893	High	1.94938	0
69	E9PWT4	H-2 class I histocompatibility antigen, Q7 alpha chain OS=Mus musculus GN=H2-Q7 PE=3 SV=2 - [E9PWT4_MOUSE]	TAQSYYnQSK	N7(Deamidated)	1190.54	0	0.001052	High	2.51079	High	2.92003	High	2.71166	0
70	E9PWV5	Solute carrier organic anion transporter family member 1A4 (Fragment) OS=Mus musculus GN=Slco1a4 PE=4 SV=1 - [E9PWV5_MOUSE]	YEYETTILPTSnLSSnSFVCTEnR(T)	N16(Deamidated); C20(Carbamidomethyl); N23(Deamidated)	2827.28	0	0.0001603	High	4.05971	High	4.22034	High	3.99041	0
71	E9PXG1	Transporter OS=Mus musculus GN=Slc6a12 PE=3 SV=1 - [E9PXG1_MOUSE]	GVSSSEnFTSPVMEFWER	N7(Deamidated); M13(Oxidation)	2105.92	0	0.0002523	High	2.72612	High	3.80091	High	3.4803	0
72	E9PZ00	Prosaposin OS=Mus musculus GN=Psap PE=4 SV=1 - [E9PZ00_MOUSE]	FSELIVnnATEELLVK	N8(Deamidated)	1819.98	0	0.000329	High	4.40413	High	3.34119	High	3.63713	0
			TnSSFIQGFVDHVK	N2(Deamidated)	1579.78	0	1.082e-05	High	2.75863	High	3.69192	High	3.56862	0
			DnATQEEILHYLEK	N2(Deamidated)	1703.82	0	6.459e-07	High	4.11095	High	4.69205	High	4.7695	0
			nSTKEEILAALEK	N1(Deamidated)	1446.77	0	2.049e-05	High	3.02641	High	3.91822	High	3.41082	1
			TnSSFIQGFVDHVKEDCDR	N2(Deamidated); C17(Carbamidomethyl)	2255.01	0	5.779e-05					High	3.66042	1
			TVVTEAGnLLKDnATQEEILHYLEK	N13(Deamidated)	2829.47	0	6.471e-10					High	5.75267	1
73	E9Q0W2	Solute carrier organic anion transporter family member 1A1 OS=Mus musculus GN=Slco1a1 PE=4 SV=1 - [E9Q0W2_MOUSE]	YETTISPTSnLSSnSFLCIEnR(T)	N14(Deamidated); C18(Carbamidomethyl); N21(Deamidated)	2535.17	0	8.544e-06	High	3.896	High	3.73618			0
			YKYETTISPTSnLSSnSFLCIEnR(T)	N16(Deamidated); C20(Carbamidomethyl); N23(Deamidated)	2826.33	0	2.963e-05	High	3.66862	High	3.70454	High	3.9096	1
74	E9Q1Y3	Apolipoprotein B-100 (Fragment) OS=Mus musculus GN=Apob PE=4 SV=1 - [E9Q1Y3_MOUSE]	LSTSPFALnLTMLPK	N9(Deamidated); M12(Oxidation)	1649.89	0	0.0005497	High	2.95645	High	3.12592	High	2.6157	0
			LTYESGFLnYSK	N9(Deamidated)	1422.68	0	1.409e-06	High	3.31765	High	3.00693	High	3.51605	0
			SKPTVSSSIELnYDFnSSK	N16(Deamidated)	2104.02	0	2.04e-06	High	4.15792	High	3.98539			0
75	E9Q251	Protein 4632428N05Rik (Fragment) OS=Mus musculus GN=4632428N05Rik PE=4 SV=1 - [E9Q251_MOUSE]	VTTPYSLYVCPEGQnATLTCR	C10(Carbamidomethyl); N15(Deamidated); C20(Carbamidomethyl)	2431.14	0	0.0008353	High	3.61822	High	3.22069	High	2.65817	0
			nFTLQHLQHHGSHLK	N1(Deamidated)	1797.92	0.004	0.05063					High	2.10521	0
76	E9Q2T3	Protein Tnxb OS=Mus musculus GN=Tnxb PE=4 SV=1 - [E9Q2T3_MOUSE]	GPnFTSPASITFTTGLKPPQDLEAK	N3(Deamidated)	2618.34	0.003	0.04182			High	1.9257			0
			GPnFTSPASITFTTGLKPPQDLEAK	N3(Deamidated); Q20(Deamidated)	2619.34	0.001	0.005903					High	2.31119	0
77	E9Q4G8	CD166 antigen OS=Mus musculus GN=Alcam PE=4 SV=1 - [E9Q4G8_MOUSE]	IIISPEEnVTLTCTAEnQLER	N8(Deamidated); C13(Carbamidomethyl)	2431.22	0	1.177e-08	High	4.43659	High	5.40519	High	4.83575	0
			TVnSLnVSAISIPEHDEADDISDEnR	N6(Deamidated)	2841.32	0	1.854e-11	High	5.13941	High	4.36236	High	4.58443	0
			LSLSEnYTLSIAnAK	N6(Deamidated)	1624.85	0	0.000854	High	4.16621	High	3.89192	High	4.05722	0
			TVnSLnVSAISIPEHDEADDISDEnR	N3(Deamidated); N6(Deamidated)	2842.31	0	0.01012	High	3.52022	High	2.25379	High	3.09074	0
			DSYPDGnITWYR	N7(Deamidated)	1487.65	0	0.001637			High	2.45197	High	1.83503	0
78	E9Q638	Disintegrin and metalloproteinase domain-containing protein 9 OS=Mus musculus GN=Adam9 PE=4 SV=1 - [E9Q638_MOUSE]	nFSSCSAEDFEK	N1(Deamidated); C5(Carbamidomethyl)	1421.56	0	0.00458	High	3.49473	High	3.15721	High	3.34858	0
79	E9Q649	Beta-1,3-galactosyl-O-glycosyl-glycoprotein beta-1,6-N-acetylglucosaminyltransferase 4 OS=Mus musculus GN=Gcnt4 PE=3 SV=1 - [GCNT4_MOUSE]	DnVnCSGVYEHEPLEIGK	N4(Deamidated); C5(Carbamidomethyl)	2060.92	0	0.02043	High	2.76752	High	3.12806			0
80	E9Q6A6	Collagen alpha-6(VI) chain OS=Mus musculus GN=Col6a6 PE=4 SV=2 - [E9Q6A6_MOUSE]	VGLVTYSnETR	N8(Deamidated)	1239.62	0	0.002425	High	2.1015	High	2.36532			0
			TEFnLTSYSSK	N4(Deamidated)	1277.59	0	0.0008138			High	2.5773			0
81	E9Q6M5	Protein Slc22a26 OS=Mus musculus GN=Slc22a26 PE=4 SV=1 - [E9Q6M5_MOUSE]	CWVHIIDnDTnSnnnSGILSQDDLLR	C1(Carbamidomethyl); N8(Deamidated); N11(Deamidated); N13(Deamidated)	3016.38	0.001	0.001074					High	3.02482	0
			CWVHIIDnDTnSnnnSGILSQDDLLR	C1(Carbamidomethyl); N11(Deamidated); N13(Deamidated)	3015.37	0.001	0.002588					High	3.07128	0
82	E9Q706	Adenylate cyclase type 9 OS=Mus musculus GN=Adcy9 PE=1 SV=1 - [E9Q706_MOUSE]	nPCnSSVLQDGR	C3(Carbamidomethyl); N4(Deamidated)	1347.6	0	1.395e-06	High	3.36624	High	3.76535	High	3.75525	0
83	E9Q7R8	Equilibrative nucleoside transporter 1 (Fragment) OS=Mus musculus GN=Slc29a1 PE=4 SV=1 - [E9Q7R8_MOUSE]	LDVSQnVSSDTDQSCESTK	N6(Deamidated); C15(Carbamidomethyl)	2100.89	0	3.126e-09	High	3.35805	High	4.98119	High	5.01907	0
84	E9Q8H9	Complement factor H OS=Mus musculus GN=Cfh PE=1 SV=2 - [E9Q8H9_MOUSE]	LTEFTHnSTMDYK	N7(Deamidated); M10(Oxidation)	1603.7	0	1.855e-06	High	2.59166	High	3.1068	High	3.67728	0
			DnSCVDPPHVPnATIVTR	C4(Carbamidomethyl); N12(Deamidated)	1992.95	0	2.194e-07	High	3.93644	High	3.91194	High	4.13977	0
			CInGTInYPTCV	C1(Carbamidomethyl); N3(Deamidated); C11(Carbamidomethyl)	1412.63	0.004	0.157	High	2.09695	High	2.11781	High	2.24973	0
			CQSPYQMnGSDTVTCVnSR	C1(Carbamidomethyl); M7(Oxidation); N8(Deamidated); C15(Carbamidomethyl)	2220.91	0	6.726e-07	High	2.29559	High	2.99486			0
			IQCVDGnWTTLPVCIEEER	C3(Carbamidomethyl); N7(Deamidated); C14(Carbamidomethyl)	2320.07	0	1.41e-06	High	2.69931	High	3.49367			0
85	E9Q8N2	Chemokine-like receptor 1 (Fragment) OS=Mus musculus GN=Cmklr1 PE=3 SV=1 - [E9Q8N2_MOUSE]	ITCFnnFSLAAPESSPHPAHSQVVSTGYSR	C3(Carbamidomethyl); N6(Deamidated)	3262.53	0	0.0014	High	2.55455	High	2.91768			0
86	E9Q8P6	Protein unc-93 homolog B1 OS=Mus musculus GN=Unc93b1 PE=4 SV=1 - [E9Q8P6_MOUSE]	SQGILnGFnK(T)	N6(Deamidated); N9(Deamidated)	1079.54	0.002	0.03744	High	1.86705	High	2.20167	High	1.9317	0
			SQGILnGFnK(T)	N9(Deamidated)	1078.55	0.007	0.1455			High	1.96102	High	1.9505	0
87	E9QMY1	OX-2 membrane glycoprotein OS=Mus musculus GN=Cd200 PE=4 SV=1 - [E9QMY1_MOUSE]	GTGTGIEnSTESHFHSnGTTSVTSILR	N8(Deamidated); N17(Deamidated)	2792.32	0	0.06078	High	2.41802	High	2.67094			0
88	E9QNL8	Integrin alpha-L OS=Mus musculus GN=Itgal PE=3 SV=1 - [E9QNL8_MOUSE]	GLFPDGSHELSGnTSITPDK	N13(Deamidated)	2072.99	0	1.402e-09	High	3.83628	High	3.5505	High	4.43575	0
			TSSEFCQPVSLHGSnHTSK	C6(Carbamidomethyl); N15(Deamidated)	2103.95	0	0.0004439	High	2.96849	High	3.25154			0
			EQEnSTLYISFTPK	N4(Deamidated)	1657.81	0	0.003009	High	3.59049	High	3.13839			0
			KCEAnLTLSSPAR	C2(Carbamidomethyl); N5(Deamidated)	1447.72	0	0.0004266	High	2.55065	High	2.94748			1
			CnVSSPIFK	C1(Carbamidomethyl); N2(Deamidated)	1052.51	0.006	0.1805	High	1.93272					0
			QADnETInYSnFLR	N4(Deamidated)	1685.79	0	0.002107	High	3.75177			High	3.40259	0
89	F2Z3W4	Semaphorin-4B OS=Mus musculus GN=Sema4b PE=4 SV=1 - [F2Z3W4_MOUSE]	KInSSLQLPDR	N3(Deamidated)	1271.7	0.001	0.01208			High	2.41202			1
90	F2Z4A3	Protein Fat1 OS=Mus musculus GN=Fat1 PE=4 SV=1 - [F2Z4A3_MOUSE]	GVnVITVnATDADSK	N8(Deamidated)	1504.75	0	2.499e-05	High	3.25823	High	3.73305	High	3.60575	0
			TGTIAIQnTTQLR	N8(Deamidated)	1417.77	0	0.000387	High	3.16677	High	2.9733			0
			GISYQLIGnHSK	N9(Deamidated)	1317.68	0	0.05413	High	2.91114					0
			InSSVTDVEEIIGVR	N2(Deamidated)	1631.85	0	6.944e-07					High	3.53713	0
91	F6QD87	DNA segment, Chr 11, ERATO Doi 18, expressed, isoform CRA_a OS=Mus musculus GN=Slc46a1 PE=4 SV=2 - [F6QD87_MOUSE]	FSTELGYnGTR	N8(Deamidated)	1245.58	0	0.001071	High	2.75141	High	2.3892	High	2.93376	0
			EnCGnQSADPLMK	C3(Carbamidomethyl); N5(Deamidated); M12(Oxidation)	1480.6	0.002	0.0152	High	1.89372			High	2.42577	0
92	F6QFB4	Solute carrier family 15 member 4 (Fragment) OS=Mus musculus GN=Slc15a4 PE=3 SV=1 - [F6QFB4_MOUSE]	nCSAPFPnGSASCPEnAAR	N1(Deamidated); C2(Carbamidomethyl); N8(Deamidated); C13(Carbamidomethyl)	2008.82	0	1.781e-07	High	2.64958	High	3.0447			0
93	F6RJC1	Teneurin-3 (Fragment) OS=Mus musculus GN=Tenm3 PE=4 SV=1 - [F6RJC1_MOUSE]	ISFLIGSDSTHVLPGESPFnK(S)	N20(Deamidated)	2246.13	0.002	0.01698					High	2.21495	0
94	F6RN19	Membralin (Fragment) OS=Mus musculus GN=Tmem259 PE=4 SV=1 - [F6RN19_MOUSE]	VFKPQSGADALnDSQDFPFPETPAK	N12(Deamidated)	2707.3	0	1.904e-08	High	4.08639	High	3.98102	High	4.84123	0
95	F6S1X8	Receptor-type tyrosine-protein phosphatase F (Fragment) OS=Mus musculus GN=Ptprf PE=4 SV=1 - [F6S1X8_MOUSE]	DInSQLELQnVTnDTHLTLLGLKPDTTYDIK	N10(Deamidated)	3513.8	0	7.989e-06	High	2.53898	High	2.91695	High	3.29551	0
			nGHITnYTVVYR	N1(Deamidated); N6(Deamidated)	1438.7	0	0.002342	High	3.07711	High	3.21683	High	2.81847	0
			nGHITnYTVVYR	N6(Deamidated)	1437.72	0	0.0006736	High	2.83706	High	2.5359			0
96	F6UD16	Integrin alpha-3 (Fragment) OS=Mus musculus GN=Itga3 PE=4 SV=4 - [F6UD16_MOUSE]	DLAVGDDYTnR(T)	N10(Deamidated)	1239.55	0	0.03464	High	2.766	High	2.65498	High	2.24337	0
97	F6VQX8	Protein Gm20547 (Fragment) OS=Mus musculus GN=Gm20547 PE=3 SV=1 - [F6VQX8_MOUSE]	IVLDPSGSMnIYLVLDGSDSIGSSnFTGAK	M9(Oxidation); N25(Deamidated)	3074.5	0	0.0005257					High	3.13759	0
98	F6WMD1	Alpha-2-macroglobulin receptor-associated protein (Fragment) OS=Mus musculus GN=Lrpap1 PE=4 SV=1 - [F6WMD1_MOUSE]	VIDLWDLAQSAnFTEK	N12(Deamidated)	1850.93	0	4.949e-07			High	4.38238			0
99	F6Y6L6	Cathepsin D (Fragment) OS=Mus musculus GN=Ctsd PE=3 SV=1 - [F6Y6L6_MOUSE]	YYHGELSYLnVTR	N10(Deamidated)	1615.78	0	0.001629	High	3.96569	High	3.64225	High	3.85149	0
			nGTSFDIHYGSGSLSGYLSQDTVSVPCK	N1(Deamidated); C27(Carbamidomethyl)	2977.37	0	2.146e-12	High	4.2887	High	4.66048	High	5.40118	0
			nGTSFDIHYGSGSLSGYLSQDTVSVPCK	N1(Deamidated); Q20(Deamidated); C27(Carbamidomethyl)	2978.35	0.001	0.003687			High	3.36399	High	2.77346	0
100	F6ZM31	Natural resistance-associated macrophage protein 2 (Fragment) OS=Mus musculus GN=Slc11a2 PE=4 SV=1 - [F6ZM31_MOUSE]	nnSSPHADLFPSDnSTLAVDIYK	N1(Deamidated); N2(Deamidated)	2507.16	0.001	0.01257			High	2.51149			0
101	F6ZXJ7	Inter-alpha-trypsin inhibitor heavy chain H3 (Fragment) OS=Mus musculus GN=Itih3 PE=4 SV=1 - [F6ZXJ7_MOUSE]	GDEKEnITAEALDLSLK	N6(Deamidated)	1846.93	0	3.434e-12	High	4.70827	High	4.88772	High	5.28845	1
102	F7A1B4	Endoglin OS=Mus musculus GN=Eng PE=4 SV=1 - [F7A1B4_MOUSE]	VnITVLPSLTSR	N2(Deamidated)	1300.75	0	0.0001346	High	3.02176	High	2.99271	High	3.25213	0
			QnGTETQEVFLVLVSnK	N2(Deamidated)	1906.99	0	1.189e-07	High	4.58702	High	3.72283	High	4.06796	0
			KLnASIVTSFVELPLVSnVSLR	N3(Deamidated); N18(Deamidated)	2388.36	0	2.758e-17			High	5.13194	High	6.07402	1
103	F7A4R2	Nectin-3 (Fragment) OS=Mus musculus GN=Pvrl3 PE=4 SV=4 - [F7A4R2_MOUSE]	nYSLnDATITLHnIGFSDSGK	N1(Deamidated)	2268.08	0	2.063e-12	High	3.38607	High	4.86794	High	4.88444	0
104	F7AWS1	Solute carrier family 22 member 23 (Fragment) OS=Mus musculus GN=Slc22a23 PE=4 SV=1 - [F7AWS1_MOUSE]	SnSSDTPPLPSPPGK	N2(Deamidated)	1481.71	0.001	0.003027	High	2.27837	High	2.89621			0
105	F7BWT7	Tetraspanin-15 OS=Mus musculus GN=Tspan15 PE=2 SV=2 - [TSN15_MOUSE]	nTTDVVnTMCGYK	N1(Deamidated); M9(Oxidation); C10(Carbamidomethyl)	1519.64	0	0.0005142	High	3.00345	High	3.02252	High	2.89307	0
106	F7CIP8	Prenylcysteine oxidase (Fragment) OS=Mus musculus GN=Pcyox1 PE=4 SV=1 - [F7CIP8_MOUSE]	GELnSTLFSSRPK	N4(Deamidated)	1436.74	0	0.0008353	High	3.01179	High	2.96595	High	2.97232	0
			MSnITFR	M1(Oxidation); N3(Deamidated)	885.416	0.001	0.08392	High	2.54735	High	2.14792	High	1.91777	0
			KMSnITFR	M2(Oxidation); N4(Deamidated)	1013.51	0.003	0.02003	High	1.77379			High	2.2954	1
			KMSnITFR	N4(Deamidated)	997.516	0.007	0.2042	High	2.13213					1
			MSnITFR	N3(Deamidated)	869.42	0.009	0.2355	High	2.19578					0
107	F8VQD7	Protein-tyrosine-phosphatase OS=Mus musculus GN=Ptprg PE=4 SV=1 - [F8VQD7_MOUSE]	VGDEYQELQLDGFDnESSnK(T)	N19(Deamidated)	2287.99	0	2.377e-08	High	3.6015	High	3.41958	High	4.41031	0
			SDFSQTMLFQAnTTR	M7(Oxidation); N12(Deamidated)	1763.79	0	0.0001053			High	2.77781			0
108	F8VQJ3	Laminin subunit gamma-1 OS=Mus musculus GN=Lamc1 PE=4 SV=1 - [F8VQJ3_MOUSE]	LLnnLTSIK	N4(Deamidated)	1016.6	0.002	0.04676			High	2.01497			0
109	F8VQL0	Receptor protein-tyrosine kinase OS=Mus musculus GN=Met PE=3 SV=1 - [F8VQL0_MOUSE]	QIGASPSDDILFGVFAQSKPDSAEPVnR(S)	N27(Deamidated)	2946.47	0	0.001071			High	2.04049	High	3.02845	0
110	G3UWE8	Hepsin, isoform CRA_c OS=Mus musculus GN=Hpn PE=3 SV=1 - [G3UWE8_MOUSE]	TAGAnGTSGFFCVDEGGLPLAQR	N5(Deamidated); C12(Carbamidomethyl)	2326.09	0	5.749e-08	High	4.1525	High	5.23285	High	4.55183	0
111	G3UWI7	Protein B3gnt2 (Fragment) OS=Mus musculus GN=B3gnt2 PE=4 SV=1 - [G3UWI7_MOUSE]	ETnVGnQTVVR	N6(Deamidated)	1217.62	0	0.01396	High	2.65098	High	3.02823	High	3.162	0
112	G3UWJ5;P35330	Intercellular adhesion molecule 2 (Fragment) OS=Mus musculus GN=Icam2 PE=4 SV=1 - [G3UWJ5_MOUSE]	ETLKnQTFGGAETVPQEATATFnSTALKK	N5(Deamidated); N23(Deamidated)	3084.55	0	0.06825	High	3.33845	High	2.88627	High	3.03374	2
			ETLKnQTFGGAETVPQEATATFnSTALK	N5(Deamidated); N23(Deamidated)	2956.46	0	0.06217	High	2.5371	High	2.55125	High	3.00921	1
113	G3UWR0	Calumenin OS=Mus musculus GN=Calu PE=1 SV=1 - [G3UWR0_MOUSE]	nATYGYVLDDPDPDDGFnYK	N1(Deamidated)	2279.98	0	6.877e-08	High	4.41043	High	5.19028	High	3.38007	0
114	G3UXW2	H-2 class I histocompatibility antigen, K-K alpha chain (Fragment) OS=Mus musculus GN=H2-K1 PE=3 SV=1 - [G3UXW2_MOUSE]	TLLGYYnQSK	N7(Deamidated)	1187.6	0	0.0003437	High	3.2226	High	3.24619	High	3.0638	0
			TLLGYYnQSK	N7(Deamidated); Q8(Deamidated)	1188.58	0.001	0.01554	High	2.40701	High	2.61256			0
			nGnATLLR	N3(Deamidated)	859.465	0	0.002497	High	2.92249	High	2.53599	High	2.56958	0
			nGnATLLR	N1(Deamidated); N3(Deamidated)	860.451	0.001	0.01585	High	2.4931	High	2.61341	High	2.18479	0
115	G3UY90	Platelet endothelial aggregation receptor 1 OS=Mus musculus GN=Pear1 PE=4 SV=1 - [G3UY90_MOUSE]	FCHCGnnSSCDPK	C2(Carbamidomethyl); C4(Carbamidomethyl); N7(Deamidated); C10(Carbamidomethyl)	1583.58	0.001	0.09443	High	1.62287					0
116	G3UYI3	Calumenin (Fragment) OS=Mus musculus GN=Calu PE=1 SV=1 - [G3UYI3_MOUSE]	nVTYGTYLDDPDPDDGFnYK	N1(Deamidated)	2309.98	0	2.398e-07	High	4.82657	High	5.18709	High	4.43338	0
117	G3UZ14	Prolyl endopeptidase FAP (Fragment) OS=Mus musculus GN=Fap PE=4 SV=1 - [G3UZ14_MOUSE]	SVnATDYGLSPDR	N3(Deamidated)	1395.64	0	0.0008016	High	2.29754	High	2.45476			0
118	G3X8T9	Serine (Or cysteine) peptidase inhibitor, clade A, member 3N, isoform CRA_a OS=Mus musculus GN=Serpina3n PE=3 SV=1 - [G3X8T9_MOUSE]	YTGnASAMFILPDQGK	N4(Deamidated); M8(Oxidation)	1729.81	0	2.242e-05	High	1.94992	High	3.15939	High	3.45202	0
119	G3X8Y8	Toll-like receptor OS=Mus musculus GN=Tlr2 PE=3 SV=1 - [G3X8Y8_MOUSE]	FLnLSSTGIR	N3(Deamidated)	1108.6	0	0.01325	High	2.85982	High	2.83217	High	2.6391	0
120	G3X924	Plasmalemma vesicle associated protein OS=Mus musculus GN=Plvap PE=4 SV=1 - [G3X924_MOUSE]	QLnISLLVK	N3(Deamidated)	1028.64	0.002	0.01385					High	2.26928	0
121	G3X9D6	Apolipoprotein N, isoform CRA_a OS=Mus musculus GN=Apon PE=4 SV=1 - [G3X9D6_MOUSE]	TQnGSLPAVTR	N3(Deamidated)	1144.6	0	0.001691	High	2.20215	High	2.6825			0
122	G3X9Q1	Integrin alpha 7 OS=Mus musculus GN=Itga7 PE=3 SV=1 - [G3X9Q1_MOUSE]	nVTLDCAQGTAK	N1(Deamidated); C6(Carbamidomethyl)	1278.6	0	2.506e-06	High	3.81552	High	3.82712			0
123	G3X9S2	Ectonucleotide pyrophosphatase/phosphodiesterase 1, isoform CRA_d OS=Mus musculus GN=Enpp1 PE=4 SV=1 - [G3X9S2_MOUSE]	VYnGSVPFEER	N3(Deamidated)	1297.61	0	0.001071	High	3.2286	High	2.97385	High	3.30331	0
			MnASFSLK	M1(Oxidation); N2(Deamidated)	914.431	0	0.002754	High	2.5464	High	2.13475	High	2.52481	0
			THnDCCInYSSVCQDKK	N3(Deamidated); C5(Carbamidomethyl); C6(Carbamidomethyl); C13(Carbamidomethyl)	2129.87	0	0.0002627	High	3.10741	High	3.09811			1
			THnDCCInYSSVCQDK	N3(Deamidated); C5(Carbamidomethyl); C6(Carbamidomethyl); C13(Carbamidomethyl)	2001.78	0	0.001845	High	3.54646	High	2.6195			0
			QLnLTTEDDDIYHMTVPYGRPR	N3(Deamidated); M14(Oxidation)	2651.25	0	7.485e-05			High	3.3428	High	2.3635	0
124	G3X9T8	Ceruloplasmin OS=Mus musculus GN=Cp PE=4 SV=1 - [G3X9T8_MOUSE]	EYEGAVYPDnTTDFQR	N10(Deamidated)	1905.82	0	1.177e-08	High	2.76639	High	4.1306	High	3.83354	0
			ELHHLQEQnVSnVFLDKEEFFIGSK	N9(Deamidated); N12(Deamidated)	2989.46	0.007	0.1474					High	2.35374	1
125	G5E897	KDEL (Lys-Asp-Glu-Leu) containing 2, isoform CRA_b OS=Mus musculus GN=Kdelc2 PE=4 SV=1 - [G5E897_MOUSE]	nFTSSPPGQTQFK	N1(Deamidated)	1439.68	0	0.001445					High	2.83708	0
126	G5E8Q8	MCG115189 OS=Mus musculus GN=Gpr116 PE=4 SV=1 - [G5E8Q8_MOUSE]	EnVTCQDPIIGIGDPGK	N2(Deamidated); C5(Carbamidomethyl)	1813.87	0	0.0005107	High	4.11297	High	4.00979	High	4.22235	0
			AnEQVIQnLnHTYK	N10(Deamidated)	1672.84	0	0.004889	High	3.26035	High	2.76421	High	2.73878	0
			MDYnSFQGTPSnETK	M1(Oxidation); N12(Deamidated)	1735.72	0	1.382e-06	High	2.33967	High	2.51236	High	2.70956	0
			LLQQQSnQSSQFLHSVER	N7(Deamidated)	2130.06	0	7.218e-05			High	3.06708			0
127	H3BIX4	Neuroplastin (Fragment) OS=Mus musculus GN=Nptn PE=4 SV=1 - [H3BIX4_MOUSE]	KKEnGVFEEISnSSGR	N4(Deamidated); N12(Deamidated)	1782.85	0	1.873e-07	High	3.62249	High	3.66378	High	3.67678	2
			EnGVFEEISnSSGR	N10(Deamidated)	1525.68	0	1.127e-05	High	3.01337	High	3.35682	High	3.25398	0
			AnATIEVK	N2(Deamidated)	846.458	0.001	0.003275			High	1.99035	High	2.40113	0
			KEnGVFEEISnSSGR	N11(Deamidated)	1653.78	0	0.0008401			High	2.57134			1
			KKEnGVFEEISnSSGR	N12(Deamidated)	1781.87	0	1.816e-06	High	3.07867			High	2.27211	2
128	H3BJ04	Interferon alpha/beta receptor 2 (Fragment) OS=Mus musculus GN=Ifnar2 PE=4 SV=4 - [H3BJ04_MOUSE]	VnnVTGnFTFVLR	N3(Deamidated); N7(Deamidated)	1482.76	0.001	0.001071					High	2.53545	0
129	H3BJH0	Low-density lipoprotein receptor-related protein 5 OS=Mus musculus GN=Lrp5 PE=4 SV=1 - [H3BJH0_MOUSE]	IEVAnLnGTSR	N7(Deamidated)	1174.61	0	0.0054	High	2.77252	High	2.62507	High	2.62793	0
130	H3BL34	Carboxylesterase 1E OS=Mus musculus GN=Ces1e PE=3 SV=1 - [H3BL34_MOUSE]	nATSYPPMCFQDPVTGQIVnDLLTnR	N1(Deamidated); M8(Oxidation); C9(Carbamidomethyl)	2968.4	0	0.001044	High	4.30112	High	4.52805	High	3.58195	0
			nTTSAAMVHCLR	N1(Deamidated); M7(Oxidation); C10(Carbamidomethyl)	1377.63	0	0.001071	High	2.03971	High	2.62277	High	2.76115	0
			nATSYPPMCFQDPVTGQIVnDLLTnRK	N1(Deamidated); M8(Oxidation); C9(Carbamidomethyl)	3096.49	0.001	0.002783			High	2.96405	High	2.98526	1
			nTTSAAMVHCLR	N1(Deamidated); C10(Carbamidomethyl)	1361.63	0.001	0.08735	High	2.5378					0
131	H3BLE9	UDP-glucuronosyltransferase 3A1 (Fragment) OS=Mus musculus GN=Ugt3a1 PE=4 SV=1 - [H3BLE9_MOUSE]	EnSSYQVInWR	N2(Deamidated)	1396.65	0	0.001071	High	3.04125	High	3.23104	High	3.2408	0
			KEnSSYQVInWR	N3(Deamidated)	1524.75	0	0.03765	High	2.69987					1
132	H7BX99	Prothrombin OS=Mus musculus GN=F2 PE=3 SV=1 - [H7BX99_MOUSE]	YPHKPEInSTTHPGADLK	N8(Deamidated)	2006.01	0	1.766e-05	High	1.88924	High	2.24481	High	2.09456	0
			SRYPHKPEInSTTHPGADLK	N10(Deamidated)	2249.13	0	0.0008176	High	2.39764	High	3.51259	High	3.42472	1
133	J3QJX3	Protein sel-1 homolog 1 OS=Mus musculus GN=Sel1l PE=4 SV=1 - [J3QJX3_MOUSE]	EATIVGEnETYPR	N8(Deamidated)	1479.7	0	0.0005679	High	3.35103	High	3.36025	High	3.14536	0
			GQTGLGFLYASGLGVnSSQAK	N16(Deamidated)	2056.05	0	8.171e-18	High	4.42931	High	4.64084	High	4.67161	0
			MYSEGSDIVPQSnETALHYFK	M1(Oxidation); N13(Deamidated)	2433.1	0	8.562e-08	High	3.53611	High	4.04432	High	3.60572	0
134	J3QN06	ATP-dependent (S)-NAD(P)H-hydrate dehydratase OS=Mus musculus GN=Carkd PE=1 SV=1 - [J3QN06_MOUSE]	LSQALGnITVVQK	N7(Deamidated)	1371.79	0	0.01201	High	4.10805	High	3.77722	High	3.65358	0
135	K4DI63	Cellular repressor of E1A-stimulated genes 1, isoform CRA_a OS=Mus musculus GN=Creg1 PE=4 SV=1 - [K4DI63_MOUSE]	VVTPEEYFnVTLQ	N9(Deamidated)	1539.77	0	7.626e-05	High	3.09668	High	3.34582	High	3.09654	0
			VnKTEEDYAR	N2(Deamidated)	1225.58	0	0.0008353	High	3.14522	High	3.15839	High	2.89716	1
136	M0QWG8	Methionine aminopeptidase 2 (Fragment) OS=Mus musculus GN=Metap2 PE=4 SV=1 - [M0QW48_MOUSE]	IHnGSEEALAQYK	N3(Deamidated)	1460.71	0	0.0001456			High	2.98226			0
			IDAYnEAAVSILnSSTR	N13(Deamidated)	1824.9	0	1.119e-07					High	3.11246	0
137	O08532-3	Isoform 2C of Voltage-dependent calcium channel subunit alpha-2/delta-1 OS=Mus musculus GN=Cacna2d1 - [CA2D1_MOUSE]	SLDnDnYVFTAPYFnK(S)	N15(Deamidated)	1908.87	0	0.0009104	High	4.3379	High	3.48393			0
138	O08677-2	Isoform LMW of Kininogen-1 OS=Mus musculus GN=Kng1 - [KNG1_MOUSE]	HSIEHFnnnTDHSHLFTLR	N8(Deamidated)	2320.1	0	1.044e-14					High	5.59878	0
139	O08692	Myeloid bactenecin (F1) OS=Mus musculus GN=Ngp PE=2 SV=1 - [O08692_MOUSE]	DCDFLEDGEERnCTGK	C2(Carbamidomethyl); N12(Deamidated); C13(Carbamidomethyl)	1945.76	0	0.001071	High	3.10971	High	3.47273	High	4.47196	1
140	O08705	Sodium/bile acid cotransporter OS=Mus musculus GN=Slc10a1 PE=1 SV=1 - [NTCP_MOUSE]	MEAHnVSAPFnFSLPPGFGHR	M1(Oxidation); N5(Deamidated); N11(Deamidated)	2330.06	0	1.249e-07	High	3.717	High	4.2217	High	4.63246	0
			MEAHnVSAPFnFSLPPGFGHR	N5(Deamidated); N11(Deamidated)	2314.08	0	0.01731	High	2.79932					0
141	O08717	Inhibin beta E chain OS=Mus musculus GN=Inhbe PE=2 SV=2 - [INHBE_MOUSE]	LQLEFRPLDLnSTAAGLPR	N11(Deamidated)	2112.15	0.001	0.002548					High	2.38488	0
142	O08795	Glucosidase 2 subunit beta OS=Mus musculus GN=Prkcsh PE=1 SV=1 - [GLU2B_MOUSE]	YEQGTGCWQGPnR(S)	C7(Carbamidomethyl); N12(Deamidated)	1553.65	0	0.0006516	High	1.7041	High	2.89633			0
143	O09043	Napsin-A OS=Mus musculus GN=Napsa PE=1 SV=1 - [NAPSA_MOUSE]	ASSSFRPnGTK	N8(Deamidated)	1152.57	0.002	0.1319	High	2.25122					0
144	O09117-2	Isoform 2 of Synaptophysin-like protein 1 OS=Mus musculus GN=Sypl1 - [SYPL1_MOUSE]	VGVnKnQTVTATFGYPFR	N6(Deamidated)	2000.03	0	2.642e-08	High	4.49334	High	4.7697	High	5.22067	1
			LnQASFHTPPnVSVCDVnWEK	N11(Deamidated); C15(Carbamidomethyl)	2443.14	0	2.188e-07	High	2.96179	High	3.97087	High	3.37012	0
			nQTVTATFGYPFR	N1(Deamidated)	1502.73	0	0.001339	High	4.11682	High	3.94056	High	3.57831	0
			VGVnKnQTVTATFGYPFR	N4(Deamidated); N6(Deamidated)	2001.02	0	0.0001141	High	2.13899	High	3.47519			1
145	O09159	Lysosomal alpha-mannosidase OS=Mus musculus GN=Man2b1 PE=2 SV=4 - [MA2B1_MOUSE]	ELnISICPVSQTSER	N3(Deamidated); C7(Carbamidomethyl)	1733.84	0	4.866e-08	High	4.17893	High	4.28752	High	4.09568	0
			DDYRPTWTLnQTEPVAGnYYPVnTR	N10(Deamidated)	2971.4	0	0.000652	High	3.97084	High	4.33298	High	3.74255	0
			RDDYRPTWTLnQTEPVAGnYYPVnTR	N11(Deamidated); N19(Deamidated)	3128.5	0	0.0002436			High	3.07459			1
			LVnAQQVnGSLVHVLYSTPTCYLWELnK	N8(Deamidated); C21(Carbamidomethyl)	3247.65	0	0.0003817					High	3.49876	0
146	O09164	Extracellular superoxide dismutase [Cu-Zn] OS=Mus musculus GN=Sod3 PE=1 SV=1 - [SODE_MOUSE]	LEAYFSLEGFPAEQnASnR	N15(Deamidated)	2144.01	0	0.0002599	High	4.44525	High	4.94353	High	4.31152	0
147	O35114	Lysosome membrane protein 2 OS=Mus musculus GN=Scarb2 PE=1 SV=3 - [SCRB2_MOUSE]	AnIQFGEnGTTISAVTnK	N8(Deamidated)	1865.93	0	3.441e-05	High	5.38782	High	5.24774	High	4.9204	0
			AYVFERnQSVGDPnVDLIR	N7(Deamidated)	2193.09	0	0.009842	High	3.40172	High	3.31983	High	3.5094	1
			nQSVGDPnVDLIR	N1(Deamidated)	1427.72	0	0.0002354	High	3.34858	High	3.66053	High	3.5376	0
			TMVFPVMYLnESVLIDK	M2(Oxidation); M7(Oxidation); N10(Deamidated)	2032.01	0	1.366e-10	High	3.84976	High	2.22887	High	4.55818	0
			nMVLQnGTK	N1(Deamidated); M2(Oxidation); N6(Deamidated)	1022.49	0.001	0.01914			High	2.4776	High	2.39317	0
			TMVFPVMYLnESVLIDKETAnQLK	M2(Oxidation); M7(Oxidation); N10(Deamidated)	2816.43	0	3.078e-06			High	2.81784	High	3.70685	1
			YKVPAEILAnTSEnAGFCIPEGnCMDSGVLnISICK	N14(Deamidated); C18(Carbamidomethyl); N23(Deamidated); C24(Carbamidomethyl); M25(Oxidation); N31(Deamidated); C35(Carbamidomethyl)	3990.85	0.006	0.09899			High	1.8484			1
			nQSVGDPnVDLIR	N1(Deamidated); N8(Deamidated)	1428.7	0.001	0.002926			High	3.18359			0
			nMVLQnGTK	M2(Oxidation); N6(Deamidated)	1021.5	0.006	0.1044			High	2.19441			0
			nMVLQnGTK	N6(Deamidated)	1005.51	0.007	0.2073	High	1.79153					0
			nGTnDGEYVFLTGEDnYLnFSK	N4(Deamidated); N16(Deamidated); N19(Deamidated)	2500.09	0	0.003497	High	3.75232					0
			nMVLQnGTK	N1(Deamidated); N6(Deamidated)	1006.49	0.006	0.1819	High	2.19442					0
			YKVPAEILAnTSEnAGFCIPEGnCMDSGVLnISICK	N14(Deamidated); C18(Carbamidomethyl); N23(Deamidated); C24(Carbamidomethyl); M25(Oxidation); C35(Carbamidomethyl)	3989.87	0	0.002014					High	2.94743	1
148	O35129	Prohibitin-2 OS=Mus musculus GN=Phb2 PE=1 SV=1 - [PHB2_MOUSE]	FnASQLITQR	N2(Deamidated); Q5(Deamidated)	1179.6	0.009	0.2351	High	1.94622					0
149	O35405	Phospholipase D3 OS=Mus musculus GN=Pld3 PE=2 SV=1 - [PLD3_MOUSE]	ELGVVMYnCSCLAR	M6(Oxidation); N8(Deamidated); C9(Carbamidomethyl); C11(Carbamidomethyl)	1688.75	0	0.0003862	High	2.10823	High	2.72522			0
150	O35516-2	Isoform Peroxisomal of Serine--pyruvate aminotransferase, mitochondrial OS=Mus musculus GN=Agxt - [SPYA_MOUSE]	GGQEPCVnEGTCVTYHnGTGFCR	C6(Carbamidomethyl); C12(Carbamidomethyl); N17(Deamidated); C22(Carbamidomethyl)	2601.06	0.006	0.1151			High	2.00301			0
151	O35598	Disintegrin and metalloproteinase domain-containing protein 10 OS=Mus musculus GN=Adam10 PE=1 SV=2 - [ADA10_MOUSE]	InTTSDEKDPTnPFR	N2(Deamidated)	1735.82	0	0.0227	High	2.99864	High	2.74133	High	2.56775	1
			EGICnGFTALCPASDPKPnFTDCnR	C4(Carbamidomethyl); N5(Deamidated); C11(Carbamidomethyl); N19(Deamidated); C23(Carbamidomethyl)	2843.21	0	0.002242	High	3.18257	High	2.83731			0
			nISQVLEK	N1(Deamidated)	931.51	0.001	0.006861			High	2.24061	High	2.19251	0
152	O35604	Niemann-Pick C1 protein OS=Mus musculus GN=Npc1 PE=1 SV=2 - [NPC1_MOUSE]	nYKnPnLTISFTAER	N6(Deamidated)	1768.89	0	4.83e-05	High	2.78215	High	3.4473	High	3.64399	1
			LIASnITETMR	N5(Deamidated); M10(Oxidation)	1265.64	0	4.271e-05	High	3.31132	High	3.43926	High	2.82319	0
			LYnVTHQFCnASVMDPTCVR	N3(Deamidated); C9(Carbamidomethyl); N10(Deamidated); M14(Oxidation); C18(Carbamidomethyl)	2430.07	0	3.867e-07	High	3.65276	High	4.25018	High	4.4828	0
			nPnLTISFTAER	N3(Deamidated)	1363.69	0	0.000321	High	2.82737	High	3.00775	High	3.04291	0
			TEQLIIQAPnTSVHIYEPYPAGADVPFGPPLnK	N10(Deamidated)	3577.84	0	2.776e-08	High	4.65754	High	5.36523	High	5.23894	0
			KGQnMVCGGMGCDnDSLVQQIFnAAELDTYTR	M5(Oxidation); C7(Carbamidomethyl); M10(Oxidation); C12(Carbamidomethyl); N14(Deamidated)	3625.59	0	0.0006756	High	4.84801	High	4.71934	High	4.47836	1
			LYnVTHQFCnASVMDPTCVR	Q7(Deamidated); C9(Carbamidomethyl); N10(Deamidated); C18(Carbamidomethyl)	2414.06	0.005	0.1691	High	2.4881					0
153	O35607	Bone morphogenetic protein receptor type-2 OS=Mus musculus GN=Bmpr2 PE=1 SV=1 - [BMPR2_MOUSE]	ISHEnGTILCSK	N5(Deamidated); C10(Carbamidomethyl)	1359.66	0	0.0002148	High	2.32335	High	2.40278			0
154	O35632	Hyaluronidase-2 OS=Mus musculus GN=Hyal2 PE=1 SV=2 - [HYAL2_MOUSE]	ATPnEGFFnQnITTFYYDR	N11(Deamidated)	2299.04	0	0.00107	High	3.78688	High	3.85628	High	3.54131	0
			RnPSAnTFLHLnASSFR	N12(Deamidated)	1932.97	0	0.0006229					High	3.34709	1
			nPSAnTFLHLnASSFR	N11(Deamidated)	1776.87	0	4.375e-06					High	3.84073	0
155	O35657	Sialidase-1 OS=Mus musculus GN=Neu1 PE=1 SV=1 - [NEUR1_MOUSE]	nLSVDIGTEMFAPGPGSGIQK	N1(Deamidated); M10(Oxidation)	2135.04	0	0.0002	High	2.68112	High	3.54291	High	2.97028	0
156	O54890	Integrin beta-3 OS=Mus musculus GN=Itgb3 PE=1 SV=2 - [ITB3_MOUSE]	DLPEELSLSFnATCLnnEVIPGLK	N11(Deamidated); C14(Carbamidomethyl)	2674.35	0	9.134e-07	High	3.27607	High	4.07309	High	3.63841	0
			CnnGnGTFECGVCR	C1(Carbamidomethyl); N5(Deamidated); C10(Carbamidomethyl); C13(Carbamidomethyl)	1645.62	0	0.003245	High	3.15702	High	2.93439			0
			CnnGnGTFECGVCR	C1(Carbamidomethyl); N3(Deamidated); N5(Deamidated); C10(Carbamidomethyl); C13(Carbamidomethyl)	1646.61	0	0.008428	High	2.9102					0
157	O54965-2	Isoform 2 of E3 ubiquitin-protein ligase RNF13 OS=Mus musculus GN=Rnf13 - [RNF13_MOUSE]	DnSSGTFIVLIR	N2(Deamidated)	1322.7	0	1.114e-07	High	3.11362	High	4.11297	High	4.24275	0
158	O55026	Ectonucleoside triphosphate diphosphohydrolase 2 OS=Mus musculus GN=Entpd2 PE=1 SV=2 - [ENTP2_MOUSE]	LLnLTSPEATAK	N3(Deamidated)	1258.69	0	0.04387	High	2.84457	High	2.65547			0
159	O55111	Desmoglein-2 OS=Mus musculus GN=Dsg2 PE=1 SV=3 - [DSG2_MOUSE]	YVQnGTYTAK	N4(Deamidated)	1145.55	0.001	0.001977	High	2.3966	High	2.18375	High	2.532	0
160	O70255	Myelin protein zero-like protein 2 OS=Mus musculus GN=Mpzl2 PE=1 SV=1 - [MPZL2_MOUSE]	LQFDDnGTYTCQVK	N6(Deamidated); C11(Carbamidomethyl)	1689.74	0	4.608e-07	High	3.88967	High	4.16856	High	3.28573	0
161	O70362	Phosphatidylinositol-glycan-specific phospholipase D OS=Mus musculus GN=Gpld1 PE=1 SV=1 - [PHLD_MOUSE]	LSSSPnVTISCK	N6(Deamidated); C11(Carbamidomethyl)	1293.64	0	8.802e-05	High	2.98056	High	2.50817	High	2.59444	0
			nLTMFISR	N1(Deamidated); M4(Oxidation)	998.499	0.001	0.005533	High	1.75364			High	2.27554	0
162	O70570	Polymeric immunoglobulin receptor OS=Mus musculus GN=Pigr PE=1 SV=1 - [PIGR_MOUSE]	KTnQSCELVIDSTEK	N3(Deamidated); C6(Carbamidomethyl)	1752.84	0	0.0003387	High	4.26006	High	3.40429	High	4.23394	1
			TnQSCELVIDSTEK	N2(Deamidated); C5(Carbamidomethyl)	1624.74	0	0.005568	High	3.90808	High	4.71151	High	3.71356	0
			nVTIECPFKR	N1(Deamidated); C6(Carbamidomethyl)	1264.64	0.002	0.03458	High	2.27287	High	2.50685			1
			AnLInFPEnnTFVInIEQLTQDDTGSYK	N9(Deamidated)	3199.56	0	1.178e-05			High	4.63506	High	3.31611	0
163	O70577-2	Isoform 2 of Solute carrier family 22 member 2 OS=Mus musculus GN=Slc22a2 - [S22A2_MOUSE]	YEVDWnQSTLDCVDPLSSLAAnR	N6(Deamidated); C12(Carbamidomethyl); N22(Deamidated)	2655.21	0	3.198e-07	High	4.83498	High	4.42341	High	3.60891	0
164	O78196	H-2 class II histocompatibility antigen, I-A beta chain OS=Mus musculus GN=H2-Eb1 PE=2 SV=1 - [O78196_MOUSE]	SECHFYnGTQR	C3(Carbamidomethyl); N7(Deamidated)	1399.57	0	0.06657	High	2.34826					0
165	O88188	Lymphocyte antigen 86 OS=Mus musculus GN=Ly86 PE=1 SV=1 - [LY86_MOUSE]	GSSILnYSYPLCEEDQPK	N6(Deamidated); C12(Carbamidomethyl)	2100.95	0.001	0.07375	High	2.4928					0
166	O88325	Alpha-N-acetylglucosaminidase OS=Mus musculus GN=Naglu PE=2 SV=1 - [O88325_MOUSE]	LLLTAAPnLTTSPAFR	N8(Deamidated)	1686.95	0	9.988e-08	High	3.36913	High	3.53542	High	4.30851	0
			SVYnCSGEACSGHnR	N4(Deamidated); C5(Carbamidomethyl); C10(Carbamidomethyl)	1698.66	0	9.476e-10	High	3.36865	High	3.51251	High	4.34829	0
167	O88531	Palmitoyl-protein thioesterase 1 OS=Mus musculus GN=Ppt1 PE=2 SV=2 - [PPT1_MOUSE]	nYSIFLADInQER	N1(Deamidated)	1583.77	0	2.183e-07	High	2.89434	High	4.30796	High	3.57938	0
168	O88783	Coagulation factor V OS=Mus musculus GN=F5 PE=1 SV=1 - [FA5_MOUSE]	SnETALSPDLnQTSPSMSTDR	N2(Deamidated); N11(Deamidated); M17(Oxidation)	2268.98	0	8.459e-08	High	3.21487	High	2.73451	High	3.4566	0
			LLnHSLLLHK	N3(Deamidated)	1188.71	0	0.0008353			High	2.97677	High	3.0013	0
			SSSYHEnDMEnPQSnITMVYLLPLGPK	M9(Oxidation); N15(Deamidated); M18(Oxidation)	3097.43	0	1.556e-05			High	3.53806			0
			GSYEIIAAnGEDTDVDKLTnSPQnQnITVPR	N24(Deamidated); N26(Deamidated)	3361.62	0	0.0404	High	3.01522					1
			SnETALSPDLnQTSPSMSTDR	N2(Deamidated); N11(Deamidated)	2252.99	0	0.00155	High	3.05706					0
			SSSYHEnDMEnPQSnITMVYLLPLGPK	M9(Oxidation); Q13(Deamidated); N15(Deamidated); M18(Oxidation)	3098.41	0.004	0.06363					High	2.74909	0
169	O88792	Junctional adhesion molecule A OS=Mus musculus GN=F11r PE=1 SV=2 - [JAM1_MOUSE]	AFMnSSFTIDPK	M3(Oxidation); N4(Deamidated)	1374.63	0	0.003782	High	3.79563	High	3.57723	High	3.77093	0
			AFMnSSFTIDPK	N4(Deamidated)	1358.63	0	0.006132	High	3.38599	High	3.12446			0
			GSVYTAQSDVQVPEnESIK	N15(Deamidated)	2051.99	0	0.01894	High	2.65188	High	2.52419			0
170	O88829-2	Isoform 2 of Lactosylceramide alpha-2,3-sialyltransferase OS=Mus musculus GN=St3gal5 - [SIAT9_MOUSE]	LnSAPVEGYSEHVGnK(T)	N15(Deamidated)	1701.81	0	8.32e-08	High	3.40086	High	3.96768	High	3.44184	0
			LnSAPVEGYSEHVGnK(T)	N2(Deamidated); N15(Deamidated)	1702.8	0	0.006028	High	2.94003	High	2.34851			0
171	O88856	Protein-tyrosine sulfotransferase 2 OS=Mus musculus GN=Tpst2 PE=1 SV=1 - [TPST2_MOUSE]	LGYDPYAnPPnYGnPDPIVInnTHR	N21(Deamidated)	2812.34	0	0.0008353	High	3.27413	High	2.36215	High	4.28343	0
			LGYDPYAnPPnYGnPDPIVInnTHR	N14(Deamidated); N21(Deamidated)	2813.34	0.007	0.2	High	2.18982					0
172	O89001	Carboxypeptidase D OS=Mus musculus GN=Cpd PE=1 SV=2 - [CBPD_MOUSE]	DLDTDFTSnASQPETK	N9(Deamidated)	1769.78	0	2.116e-07	High	3.41259	High	4.14426	High	2.67836	0
			FAnEYPnITR	N7(Deamidated)	1225.59	0	0.03269	High	2.73949	High	2.22202	High	2.36038	0
			LLnTTDVYLLPSLnPDGFER	N3(Deamidated)	2278.17	0	1.733e-05			High	3.67126	High	3.40851	0
			DSVTGSGLEnATISVAGInHnITTGR	N10(Deamidated); N19(Deamidated)	2586.28	0.003	0.03105					High	2.35173	0
173	O89017	Legumain OS=Mus musculus GN=Lgmn PE=1 SV=1 - [LGMN_MOUSE]	SHTnTSHVMQYGnK	N4(Deamidated); M9(Oxidation); N13(Deamidated)	1621.7	0	9.943e-08	High	2.5994	High	4.94475	High	3.3615	0
			SHTnTSHVMQYGnK	N4(Deamidated); N13(Deamidated)	1605.7	0	1.144e-05	High	3.20391	High	2.10393			0
			nGIPDEQIIVMMYDDIAnSEEnPTPGVVInRPnGTDVYK	Q7(Deamidated); M11(Oxidation); M12(Oxidation); N33(Deamidated)	4352.04	0	0.001836			High	2.22958	High	3.3011	0
			SHTnTSHVMQYGnK	N4(Deamidated); M9(Oxidation); Q10(Deamidated); N13(Deamidated)	1622.68	0	0.0009459			High	2.48024			0
			nGIPDEQIIVMMYDDIAnSEEnPTPGVVInRPnGTDVYK	M11(Oxidation); M12(Oxidation); N33(Deamidated)	4351.08	0.004	0.05966					High	2.45742	0
174	O89020-2	Isoform 2 of Afamin OS=Mus musculus GN=Afm - [AFAM_MOUSE]	HVEDKFnETTQR	N7(Deamidated)	1504.71	0.001	0.02014	High	1.87244	High	3.02925	High	3.01099	1
175	O89023	Tripeptidyl-peptidase 1 OS=Mus musculus GN=Tpp1 PE=1 SV=2 - [TPP1_MOUSE]	SSSHLPPSSYFnASGR	N12(Deamidated)	1694.78	0	6.369e-05	High	3.28783	High	3.33393	High	3.72064	0
			DVGSGTTnnSQACAQFLEQYFHnSDLTEFMR	N9(Deamidated); C13(Carbamidomethyl); M30(Oxidation)	3584.57	0	0.001071	High	2.54503	High	3.41975	High	3.41516	0
			QRYnLTAK	N4(Deamidated)	994.538	0.001	0.09956	High	3.07173			High	2.73012	1
			YnLTAK	N2(Deamidated)	710.373	0.009	0.1702					High	1.92522	0
176	P01029	Complement C4-B OS=Mus musculus GN=C4b PE=1 SV=3 - [CO4B_MOUSE]	FSDGLESnR(S)	N8(Deamidated)	1025.46	0	0.0001911	High	2.90141	High	2.91039	High	2.46143	0
			ALnVTLSSMGR	N3(Deamidated); M9(Oxidation)	1165.59	0	0.001071	High	3.05021	High	3.2843	High	3.33836	0
			nTTCQDLQIEVK	N1(Deamidated); C4(Carbamidomethyl)	1449.69	0	8.737e-05	High	3.85834	High	3.2503	High	3.38582	0
177	P01831	Thy-1 membrane glycoprotein OS=Mus musculus GN=Thy1 PE=1 SV=1 - [THY1_MOUSE]	VLTLAnFTTK	N6(Deamidated)	1108.63	0	0.001387	High	2.50145	High	2.5312	High	2.23064	0
178	P01863	Ig gamma-2A chain C region, A allele OS=Mus musculus GN=Ighg PE=1 SV=1 - [GCAA_MOUSE]	EDYnSTIR	N4(Deamidated)	998.445	0.001	0.06943	High	2.21359	High	1.8243	High	1.9601	0
179	P01868	Ig gamma-1 chain C region secreted form OS=Mus musculus GN=Ighg1 PE=1 SV=1 - [IGHG1_MOUSE]	EEQFnSTFR	N5(Deamidated)	1158.51	0	0.04571	High	2.39033	High	2.42777	High	2.39493	0
			EEQFnSTFR	Q3(Deamidated); N5(Deamidated)	1159.49	0.001	0.008417			High	2.07548			0
180	P01872	Ig mu chain C region OS=Mus musculus GN=Ighm PE=1 SV=2 - [IGHM_MOUSE]	STGKPTLYnVSLIMSDTGGTCY	N9(Deamidated); M14(Oxidation); C21(Carbamidomethyl)	2382.09	0	0.001071			High	2.82352	High	3.72469	0
			nVSSTCAASPSTDILTFTIPPSFADIFLSK	N1(Deamidated); C6(Carbamidomethyl)	3188.6	0	0.001071	High	2.79472			High	3.10112	0
			IMESHPnGTFSAK	N7(Deamidated)	1419.66	0	0.03575	High	2.33199					0
			IMESHPnGTFSAK	M2(Oxidation); N7(Deamidated)	1435.65	0	0.0002951					High	2.73672	0
181	P01899	H-2 class I histocompatibility antigen, D-B alpha chain OS=Mus musculus GN=H2-D1 PE=1 SV=2 - [HA11_MOUSE]	nLLGYYnQSAGGSHTLQQMSGCDLGSDWR	N7(Deamidated); M19(Oxidation); C22(Carbamidomethyl)	3232.42	0	0.0005331			High	2.86631	High	4.21464	0
182	P02469	Laminin subunit beta-1 OS=Mus musculus GN=Lamb1 PE=1 SV=3 - [LAMB1_MOUSE]	VnASTTDPnSTVEQSALTR	N2(Deamidated)	1991.96	0	3.739e-10	High	3.2694	High	3.68941	High	4.20914	0
			VnASTTDPnSTVEQSALTR	N2(Deamidated); N9(Deamidated)	1992.94	0	0.0007951	High	2.49677					0
183	P03987-2	Isoform 2 of Ig gamma-3 chain C region OS=Mus musculus - [IGHG3_MOUSE]	EAQYnSTFR	N5(Deamidated)	1116.5	0.001	0.005831			High	2.18711	High	1.81863	0
184	P04202	Transforming growth factor beta-1 OS=Mus musculus GN=Tgfb1 PE=1 SV=1 - [TGFB1_MOUSE]	LASPPSQGEVPPGPLPEAVLALYnSTR	N24(Deamidated)	2761.46	0	0.001071			High	2.2331	High	2.93247	0
185	P05555-2	Isoform 2 of Integrin alpha-M OS=Mus musculus GN=Itgam - [ITAM_MOUSE]	AIVASEnnMSR	N8(Deamidated); M9(Oxidation)	1208.56	0	0.001071	High	2.09253	High	2.2907	High	2.84964	0
			LnYTLVGEPLR	N2(Deamidated)	1275.7	0	0.0008525	High	2.78505	High	2.87352	High	3.01678	0
			DKVTFInTTR	N7(Deamidated)	1195.63	0.001	0.003512			High	2.28551			1
			AFFDETKnnTR	N9(Deamidated)	1343.62	0.003	0.03312					High	2.31477	1
186	P06339	H-2 class I histocompatibility antigen, D-37 alpha chain OS=Mus musculus GN=H2-T23 PE=1 SV=1 - [HA15_MOUSE]	LGnETLQR	N3(Deamidated)	931.487	0	0.001019	High	2.39868	High	2.22846	High	2.68232	0
187	P06683	Complement component C9 OS=Mus musculus GN=C9 PE=1 SV=2 - [CO9_MOUSE]	GAGEVSPAEHSSKPTnISAK	N16(Deamidated)	1967.97	0	0.0001078	High	3.42356	High	3.45555	High	3.52311	0
188	P06684	Complement C5 OS=Mus musculus GN=C5 PE=1 SV=2 - [CO5_MOUSE]	SITHDTDGVAVFVLnLPSnVTVLK	N19(Deamidated)	2540.38	0	0.0006793			High	2.75748	High	2.64943	0
189	P06797	Cathepsin L1 OS=Mus musculus GN=Ctsl PE=1 SV=2 - [CATL1_MOUSE]	AEFAVAnDTGFVDIPQQEK	N7(Deamidated)	2080	0	3.938e-09	High	4.88146	High	5.16311	High	5.56623	0
			AEFAVAnDTGFVDIPQQEK	N7(Deamidated); Q16(Deamidated)	2080.99	0	0.001071			High	2.81016	High	4.1408	0
190	P07309	Transthyretin OS=Mus musculus GN=Ttr PE=1 SV=1 - [TTHY_MOUSE]	TLGISPFHEFADVVFTAnDSGHR	N18(Deamidated)	2518.22	0	1.807e-10					High	4.36762	0
191	P07759	Serine protease inhibitor A3K OS=Mus musculus GN=Serpina3k PE=1 SV=2 - [SPA3K_MOUSE]	nLInDYVSnQTQGMIK	N9(Deamidated); M14(Oxidation)	1854.9	0	4.156e-06	High	4.4402	High	5.0551	High	4.79216	0
			YTGnASALLILPDQGR	N4(Deamidated)	1689.89	0	1.592e-07	High	3.92998	High	4.48118	High	3.94098	0
			nLInDYVSnQTQGMIK	N4(Deamidated); N9(Deamidated); M14(Oxidation)	1855.88	0	1.577e-05	High	2.74405	High	2.93078	High	2.15931	0
			FnLTETPEADIHQGFGnLLQSLSQPEDQDQInIGnAMFIEK	N2(Deamidated); M37(Oxidation)	4619.23	0	0.0008353			High	3.72145			0
			nLInDYVSnQTQGMIK	N9(Deamidated)	1838.9	0	0.0002339	High	4.16195					0
192	P08071	Lactotransferrin OS=Mus musculus GN=Ltf PE=2 SV=4 - [TRFL_MOUSE]	nSSnFHLnQLQGLR	N1(Deamidated)	1628.82	0	2.678e-07	High	4.29819	High	4.06102	High	3.95583	0
193	P08101-2	Isoform IIB2 of Low affinity immunoglobulin gamma Fc region receptor II OS=Mus musculus GN=Fcgr2 - [FCGR2_MOUSE]	YHHYSSnFSIPK	N7(Deamidated)	1480.69	0	1.622e-10	High	3.37299	High	3.6988	High	4.23055	0
			ATVnDSGEYR	N4(Deamidated)	1112.49	0	0.0006496	High	3.16187	High	3.09673	High	2.97153	0
			AnHSHSGDYYCK	N2(Deamidated); C11(Carbamidomethyl)	1439.57	0	0.001071	High	2.62552	High	2.81712	High	3.44827	0
			EDTVTLTCEGTHnPGnSSTQWFHnGR	C8(Carbamidomethyl); N16(Deamidated); N24(Deamidated)	2947.26	0	0.001071	High	3.75683	High	3.10159	High	3.38435	0
			EDTVTLTCEGTHnPGnSSTQWFHnGR	C8(Carbamidomethyl); N16(Deamidated)	2946.28	0	8.651e-07	High	3.94676	High	3.39262	High	4.8323	0
194	P08113	Endoplasmin OS=Mus musculus GN=Hsp90b1 PE=1 SV=2 - [ENPL_MOUSE]	LGVIEDHSnR(T)	N9(Deamidated)	1140.57	0	0.00427	High	3.02228	High	2.32016	High	2.38163	0
			HnnDTQHIWESDSnEFSVIADPR	N3(Deamidated)	2712.2	0	0.04215	High	4.05718	High	4.46147	High	4.72426	0
			TDDEVVQREEEAIQLDGLnASQIR	N19(Deamidated)	2729.33	0	1.547e-06	High	4.45781	High	4.61359	High	5.00943	1
			GVVDSDDLPLnVSR	N11(Deamidated)	1486.74	0	4.534e-07	High	3.25551	High	3.35888	High	3.9609	0
			EEEAIQLDGLnASQIR	N11(Deamidated)	1786.88	0	7.583e-17	High	4.4396	High	4.64637	High	4.81113	0
195	P08607	C4b-binding protein OS=Mus musculus GN=C4bpa PE=1 SV=3 - [C4BPA_MOUSE]	LVGSPFIGCTVVnK(T)	C9(Carbamidomethyl); N13(Deamidated)	1491.79	0	1.393e-09	High	3.12476	High	3.65526	High	4.16078	0
			LACLnGTVLR	C3(Carbamidomethyl); N5(Deamidated)	1117.6	0	0.007679	High	3.21055	High	2.94117	High	3.02522	0
			CEQEASEDLKPALTGnK(T)	C1(Carbamidomethyl); N16(Deamidated)	1890.88	0	0.0008353	High	3.07437	High	3.15887	High	3.63544	0
196	P09055	Integrin beta-1 OS=Mus musculus GN=Itgb1 PE=1 SV=1 - [ITB1_MOUSE]	KEnSSEICSnnGECVCGQCVCR	N3(Deamidated); C8(Carbamidomethyl); N10(Deamidated); C14(Carbamidomethyl); C16(Carbamidomethyl); C19(Carbamidomethyl); C21(Carbamidomethyl)	2649.01	0	9.612e-08	High	4.14341	High	4.86296	High	3.85047	1
			KEnSSEICSnnGECVCGQCVCR	N3(Deamidated); C8(Carbamidomethyl); C14(Carbamidomethyl); C16(Carbamidomethyl); C19(Carbamidomethyl); C21(Carbamidomethyl)	2648.04	0	4.663e-08	High	4.09218	High	2.40454	High	4.56951	1
			LRnPCTSEQnCTSPFSYK	C5(Carbamidomethyl); N10(Deamidated); C11(Carbamidomethyl)	2189.96	0	0.0009632	High	3.49695	High	3.92504	High	4.0665	1
			KDTCAQECSHFnLTK	C4(Carbamidomethyl); C8(Carbamidomethyl); N12(Deamidated)	1839.81	0	8.539e-10	High	4.60428	High	5.30203	High	5.34096	1
			nPCTSEQnCTSPFSYK	C3(Carbamidomethyl); N8(Deamidated); C9(Carbamidomethyl)	1920.78	0	5.773e-08	High	5.028	High	5.03698	High	4.87053	0
			DTCAQECSHFnLTK	C3(Carbamidomethyl); C7(Carbamidomethyl); N11(Deamidated)	1711.71	0	9.062e-07	High	4.71473	High	4.34214	High	4.39256	0
			CHEGnGTFECGACR	C1(Carbamidomethyl); N5(Deamidated); C10(Carbamidomethyl); C13(Carbamidomethyl)	1655.61	0	1.012e-06	High	4.17589	High	3.81943	High	3.91391	0
			nPCTSEQnCTSPFSYK	C3(Carbamidomethyl); Q7(Deamidated); N8(Deamidated); C9(Carbamidomethyl)	1921.76	0	5.644e-07	High	2.35077	High	4.22953			0
197	P09242	Alkaline phosphatase, tissue-nonspecific isozyme OS=Mus musculus GN=Alpl PE=1 SV=2 - [PPBT_MOUSE]	VVDGEREnVSMVDYAHnnYQAQSAVPLR	N8(Deamidated); M11(Oxidation)	3178.49	0.001	0.009892			High	1.73255			1
198	P09581	Macrophage colony-stimulating factor 1 receptor OS=Mus musculus GN=Csf1r PE=1 SV=3 - [CSF1R_MOUSE]	THnSVGnSSQYFR	N7(Deamidated)	1497.67	0	0.0001426	High	2.87858	High	3.36862	High	2.91497	0
199	P10605	Cathepsin B OS=Mus musculus GN=Ctsb PE=1 SV=2 - [CATB_MOUSE]	QnTTWQAGR	N2(Deamidated)	1062.5	0.002	0.1202	High	1.93153	High	2.16067			0
200	P10810	Monocyte differentiation antigen CD14 OS=Mus musculus GN=Cd14 PE=1 SV=1 - [CD14_MOUSE]	LDRnPSPDELPQVGnLSLK	N15(Deamidated)	2093.09	0.002	0.02701			High	2.28144			1
201	P11152	Lipoprotein lipase OS=Mus musculus GN=Lpl PE=1 SV=3 - [LIPL_MOUSE]	TPEDTAEDTCHLIPGLADSVSnCHFnHSSK	C10(Carbamidomethyl); C23(Carbamidomethyl); N26(Deamidated)	3340.46	0	0.001759	High	2.5534	High	3.59695	High	2.62079	0
202	P11247	Myeloperoxidase OS=Mus musculus GN=Mpo PE=2 SV=2 - [PERM_MOUSE]	SYnDSVDPR	N3(Deamidated)	1053.45	0	0.002136			High	2.57659			0
203	P11438	Lysosome-associated membrane glycoprotein 1 OS=Mus musculus GN=Lamp1 PE=1 SV=2 - [LAMP1_MOUSE]	AFnISPnDTSSGSCGInLVTLK	N7(Deamidated); C14(Carbamidomethyl)	2296.13	0	9.284e-06	High	5.94401	High	5.65287	High	5.79244	0
			GYLLTLnFTK	N7(Deamidated)	1170.65	0	0.0008969	High	3.15913	High	3.31421	High	3.07177	0
			AFnISPnDTSSGSCGInLVTLK	N3(Deamidated); N7(Deamidated); C14(Carbamidomethyl)	2297.11	0	1.528e-09	High	5.74684	High	4.57533	High	4.93037	0
			LnMTLPDALVPTFSISnHSLK	N2(Deamidated); M3(Oxidation); N17(Deamidated)	2316.19	0	6.299e-07	High	3.65796	High	4.77303	High	4.08244	0
			EnVSDPSLTITFGR	N2(Deamidated)	1536.76	0	1.796e-07	High	4.45262	High	4.8286	High	4.42987	0
			DATIQAYLSSGnFSK	N12(Deamidated)	1602.77	0	2.384e-07	High	4.18869	High	4.13534	High	4.34037	0
			nGSSCGKEnVSDPSLTITFGR	N1(Deamidated); C5(Carbamidomethyl); N9(Deamidated)	2228.02	0	3.177e-07	High	3.98262	High	5.35248	High	4.1206	1
			YSVQHMYFTYnLSDTEHFPnAISK	M6(Oxidation); N11(Deamidated)	2909.32	0	1.503e-08	High	4.32895	High	3.74436	High	4.4811	0
			LnMTLPDALVPTFSISnHSLK	N2(Deamidated); N17(Deamidated)	2300.2	0	0.001302	High	2.96766	High	2.8761			0
			nVTVVLR	N1(Deamidated)	801.483	0.002	0.04629			High	1.8332	High	2.2923	0
			AFnISPnDTSSGSCGInLVTLK	N3(Deamidated); N7(Deamidated); C14(Carbamidomethyl); N17(Deamidated)	2298.1	0.001	0.00591			High	2.59142			0
			nGSSCGKEnVSDPSLTITFGR	N1(Deamidated); C5(Carbamidomethyl)	2227.04	0.008	0.2206	High	2.02574					1
			YnVTGnnGTCLLASMALQLnITYLK	N6(Deamidated); N7(Deamidated); C10(Carbamidomethyl); M15(Oxidation); N20(Deamidated)	2791.36	0	3.724e-08					High	4.4609	0
204	P11499;P08113	Heat shock protein HSP 90-beta OS=Mus musculus GN=Hsp90ab1 PE=1 SV=3 - [HS90B_MOUSE]	ELISnASDALDK	N5(Deamidated)	1276.63	0	0.004988	High	3.04554					0
205	P11609	Antigen-presenting glycoprotein CD1d1 OS=Mus musculus GN=Cd1d1 PE=1 SV=3 - [CD1D1_MOUSE]	VLnADQGTSATVQMLLnDTCPLFVR	N17(Deamidated); C20(Carbamidomethyl)	2764.38	0	6.246e-08	High	4.68797	High	3.67313	High	3.54692	0
			VLnADQGTSATVQMLLnDTCPLFVR	M14(Oxidation); N17(Deamidated); C20(Carbamidomethyl)	2780.38	0	0.0001603	High	5.03723	High	4.70908	High	4.87221	0
206	P11688	Integrin alpha-5 OS=Mus musculus GN=Itga5 PE=1 SV=3 - [ITA5_MOUSE]	HPGnFSSLSCDYFAVnQSR	N4(Deamidated); C10(Carbamidomethyl); N16(Deamidated)	2187.95	0	2.329e-05	High	3.2169	High	3.70783	High	4.57104	0
			nALnLTFHAQnLGEGGAYEAELR	N4(Deamidated)	2489.21	0	3.583e-09	High	4.42273	High	4.57575	High	5.04019	0
			TEKDPQnDPVGTCYLSTEnFTR	C13(Carbamidomethyl); N19(Deamidated)	2573.16	0	4.847e-07	High	3.8142	High	3.67126	High	4.49899	1
			DPQnDPVGTCYLSTEnFTR	C10(Carbamidomethyl); N16(Deamidated)	2214.97	0	0.0009062	High	3.62906					0
207	P11881-8	Isoform 8 of Inositol 1,4,5-trisphosphate receptor type 1 OS=Mus musculus GN=Itpr1 - [ITPR1_MOUSE]	VETGEnCTSPAPK	N6(Deamidated); C7(Carbamidomethyl)	1390.62	0	0.0001692	High	4.48306	High	3.91824	High	3.35145	0
208	P12265	Beta-glucuronidase OS=Mus musculus GN=Gusb PE=2 SV=2 - [BGLR_MOUSE]	ITIAInnTLTPHTLPPGTIVYK	N6(Deamidated)	2378.34	0	0.0008353	High	4.02805	High	4.37319	High	4.75113	0
			IAnETGGHGSGPR	N3(Deamidated)	1253.6	0	0.0005242	High	2.29562	High	2.19685	High	2.55254	0
			YGIVVIDECPGVGIVLPQSFGnESLR	C9(Carbamidomethyl); N22(Deamidated)	2819.45	0	1.37e-06	High	4.0827	High	4.52707	High	3.88505	0
209	P13597	Intercellular adhesion molecule 1 OS=Mus musculus GN=Icam1 PE=1 SV=1 - [ICAM1_MOUSE]	GDHGAnFSCR	N6(Deamidated); C9(Carbamidomethyl)	1121.45	0	0.001071	High	3.14711	High	2.51478	High	3.69563	0
			VVLLSGVEPRPPTPQVQFTLnASSEDHKR	N21(Deamidated)	3202.69	0	1.495e-07	High	2.70693	High	4.0004	High	5.19408	1
			TELDLRPQGLALFSnVSEAR	N15(Deamidated)	2217.16	0	1.516e-08	High	3.138	High	3.57895	High	3.74935	0
			EAFLPQGGSVQVnCSSSCK	N13(Deamidated); C14(Carbamidomethyl); C18(Carbamidomethyl)	2055.92	0	2.352e-08	High	4.43935	High	4.53358	High	4.33673	0
			TLTVYnFSAPVLTLSQLEVSEGSQVTVK	N6(Deamidated)	3011.6	0	9.368e-05			High	3.08178			0
			QEMnGTYVCHAFSSHGnVTR	M3(Oxidation); N4(Deamidated); C9(Carbamidomethyl); N17(Deamidated)	2312.97	0	0.001071					High	2.61422	0
210	P14094	Sodium/potassium-transporting ATPase subunit beta-1 OS=Mus musculus GN=Atp1b1 PE=1 SV=1 - [AT1B1_MOUSE]	LDWLGnCSGLnDDSYGYR	N6(Deamidated); C7(Carbamidomethyl)	2105.9	0	6.074e-12	High	4.84651	High	5.37297	High	5.28156	0
			YLQPLLAVQFTnLTVDTEIR	N12(Deamidated)	2335.27	0	2.95e-08	High	5.27326	High	5.49102	High	5.68588	0
			VLGFKPKPPKnESLETYPLMMK	N11(Deamidated); M20(Oxidation); M21(Oxidation)	2580.36	0	4.411e-06	High	2.63443	High	4.25047	High	2.56436	1
			VLGFKPKPPKnESLETYPLMMK	N11(Deamidated); M21(Oxidation)	2564.36	0.001	0.08395	High	2.12763					1
			FKLDWLGnCSGLnDDSYGYR	N8(Deamidated); C9(Carbamidomethyl)	2381.07	0	1.258e-08					High	5.25085	1
211	P14426	H-2 class I histocompatibility antigen, D-K alpha chain OS=Mus musculus GN=H2-D1 PE=1 SV=1 - [HA13_MOUSE]	EQnYTCHVYHEGLPEPLTLR	N3(Deamidated); C6(Carbamidomethyl)	2457.16	0	8.994e-07	High	3.63953	High	3.92743	High	4.15332	0
212	P14438	H-2 class II histocompatibility antigen, A-U alpha chain (Fragment) OS=Mus musculus GN=H2-Aa PE=1 SV=1 - [HA2U_MOUSE]	RSnSTPATnEAPQATVFPK	N3(Deamidated)	2017	0	0.006696	High	4.00047	High	3.73491	High	3.47289	1
			SnSTPATnEAPQATVFPK	N2(Deamidated)	1860.9	0	7.547e-06	High	3.64236	High	3.60967	High	3.55215	0
213	P15208	Insulin receptor OS=Mus musculus GN=Insr PE=1 SV=2 - [INSR_MOUSE]	GETLEIGnYSFYALDnQnLR	N8(Deamidated)	2318.1	0	9.262e-09	High	3.88378	High	4.37754	High	4.07424	0
			HnLTITQGK	N2(Deamidated)	1012.55	0	0.0003265	High	2.6472	High	2.91884	High	2.42842	0
			ECLGnCSEPDDPTK	C2(Carbamidomethyl); N5(Deamidated); C6(Carbamidomethyl)	1622.64	0	5.525e-07	High	3.44676	High	3.7344	High	3.81924	0
			SLEEVGnVTATTLTLPDFPnVSSTIVPTSQEEHRPFEK	N7(Deamidated); N20(Deamidated)	4172.05	0.001	0.003888			High	3.30761			0
214	P16294	Coagulation factor IX OS=Mus musculus GN=F9 PE=2 SV=3 - [FA9_MOUSE]	TIPHHQYnATInK	N8(Deamidated)	1537.78	0	1.321e-05	High	2.7601	High	3.03921	High	2.63811	0
215	P16301	Phosphatidylcholine-sterol acyltransferase OS=Mus musculus GN=Lcat PE=1 SV=2 - [LCAT_MOUSE]	AELSnHTRPVILVPGCLGnR	N5(Deamidated); C16(Carbamidomethyl)	2204.16	0	8.158e-06	High	1.92797	High	1.73406	High	4.07706	0
			QSQPVHLLPMnETDHLnMVFSnK(T)	M10(Oxidation); N17(Deamidated); M18(Oxidation); N22(Deamidated)	2713.27	0	0.0007604			High	2.85064	High	2.9911	0
			IVYnHSSGR	N4(Deamidated)	1033.51	0.001	0.002713					High	2.22417	0
216	P16406	Glutamyl aminopeptidase OS=Mus musculus GN=Enpep PE=1 SV=1 - [AMPE_MOUSE]	GGITLnAnLSGDAFLK	N8(Deamidated)	1591.84	0	0.0005323	High	4.44595	High	3.79545	High	4.37201	0
			IALnLTMYLK	N4(Deamidated); M7(Oxidation)	1196.66	0	0.008008	High	3.50466	High	2.93411	High	3.22468	0
			EALGnASQLFDSWLK	N5(Deamidated)	1679.83	0	3.444e-08	High	3.51978	High	4.07366	High	3.97799	0
			GWLnGSLVGFYK	N4(Deamidated)	1341.69	0	0.001071					High	3.42542	0
217	P16675	Lysosomal protective protein OS=Mus musculus GN=Ctsa PE=1 SV=1 - [PPGB_MOUSE]	MYVTnDTEVAEnnYEALK	M1(Oxidation); N5(Deamidated)	2120.94	0	3.006e-12	High	5.08912	High	4.50805	High	4.95382	0
			MYVTnDTEVAEnnYEALKDFFR	M1(Oxidation); N5(Deamidated)	2686.21	0	1.632e-08	High	3.40369	High	2.25046	High	4.06569	1
			VRLDPPCTnTTAPSnYLnnPYVR	C7(Carbamidomethyl); N9(Deamidated)	2663.29	0	0.0008353	High	2.57737	High	2.87995	High	3.23061	1
			LDPPCTnTTAPSnYLnnPYVR	C5(Carbamidomethyl); N7(Deamidated)	2408.13	0	4.883e-09	High	4.23047	High	4.70698	High	5.02782	0
			MYVTnDTEVAEnnYEALK	N5(Deamidated)	2104.94	0	0.03593	High	3.15141					0
			MYVTnDTEVAEnnYEALK	M1(Oxidation); N5(Deamidated); N12(Deamidated)	2121.92	0	0.02783	High	2.92494					0
218	P17047	Lysosome-associated membrane glycoprotein 2 OS=Mus musculus GN=Lamp2 PE=2 SV=2 - [LAMP2_MOUSE]	EASHYSIHDIVLSYnTSDSTVFPGAVAK	N15(Deamidated)	3009.47	0	9.074e-17	High	4.96677	High	5.13505	High	5.83577	0
			VPFIFnInPATTnFTGSCQPQSAQLR	N13(Deamidated); C18(Carbamidomethyl)	2909.45	0	2.849e-05	High	7.09244	High	6.56132	High	4.81055	0
			nLSFWDAPLGSSYMCnK	N1(Deamidated); M14(Oxidation); C15(Carbamidomethyl)	2006.87	0	1.613e-09	High	3.83208	High	4.24688	High	4.31224	0
			EVnVYMYLAnGSAFnISnK	M6(Oxidation); N10(Deamidated); N15(Deamidated)	2151.99	0	1.235e-15	High	4.70562	High	5.47631	High	5.76992	0
			CnSVLTYnLTPVVQK	C1(Carbamidomethyl); N8(Deamidated)	1736.89	0	4.196e-10	High	4.238	High	4.29201	High	4.4972	0
			CnSVLTYnLTPVVQK	C1(Carbamidomethyl); N2(Deamidated); N8(Deamidated)	1737.88	0	1.958e-06	High	4.38961	High	4.55231	High	3.5799	0
			VPFIFnInPATTnFTGSCQPQSAQLR	N13(Deamidated); C18(Carbamidomethyl); Q19(Deamidated)	2910.4	0.003	0.02974	High	2.87353			High	3.22649	0
			nGnTTCLLATMGLQLnITEEK	N3(Deamidated); C6(Carbamidomethyl); M11(Oxidation); N16(Deamidated)	2339.12	0	4.032e-10					High	4.72649	0
			nGnTTCLLATMGLQLnITEEK	N1(Deamidated); N3(Deamidated); C6(Carbamidomethyl); M11(Oxidation); N16(Deamidated)	2340.11	0	0.001071					High	2.41435	0
			EVnVYMYLAnGSAFnISnK	M6(Oxidation); N10(Deamidated)	2151.02	0	2.082e-06					High	4.54516	0
219	P17439	Glucosylceramidase OS=Mus musculus GN=Gba PE=1 SV=1 - [GLCM_MOUSE]	DLGPALAnSSHDVK	N8(Deamidated)	1424.7	0	7.551e-07	High	3.5941	High	4.1986	High	3.41259	0
			VYTYADTPnDFQLSnFSLPEEDTK	N15(Deamidated)	2795.27	0	2.99e-08	High	5.17033	High	5.3735	High	4.38416	0
			MELSVGAIQAnR(T)	M1(Oxidation); N11(Deamidated)	1305.65	0	1.714e-07	High	3.21233	High	3.53552	High	3.61658	0
			VYTYADTPnDFQLSnFSLPEEDTKLK	N15(Deamidated)	3036.45	0	1.74e-06	High	3.89196	High	4.1513			1
			RMELSVGAIQAnR(T)	M2(Oxidation); N12(Deamidated)	1461.75	0.002	0.01714			High	2.52744	High	2.72637	1
			MELSVGAIQAnR(T)	N11(Deamidated)	1289.65	0	0.008281	High	3.18826					0
220	P17717	UDP-glucuronosyltransferase 2B17 OS=Mus musculus GN=Ugt2b17 PE=2 SV=1 - [UDB17_MOUSE]	DMEEFVQSSGDHGVVVFSLGSMVSnMTEEK	M2(Oxidation); M22(Oxidation); N25(Deamidated); M26(Oxidation)	3324.43	0	8.002e-05	High	3.46695	High	3.96182	High	3.13223	0
221	P18181	CD48 antigen OS=Mus musculus GN=Cd48 PE=1 SV=1 - [CD48_MOUSE]	ILEYnYnSTK	N7(Deamidated)	1245.6	0	0.03362	High	2.79852	High	2.41003			0
			KSPGYVLDLIVTPQnK(S)	N15(Deamidated)	1772.99	0	0.0007416	High	4.06325	High	4.37466			1
			nDTVYFTLPCDLAR	N1(Deamidated); C10(Carbamidomethyl)	1685.79	0	0.05007	High	2.31552					0
222	P18572-2	Isoform 2 of Basigin OS=Mus musculus GN=Bsg - [BASI_MOUSE]	TSDTGEEEAITnSTEAnGK	N12(Deamidated); N17(Deamidated)	1955.83	0	2.605e-11	High	5.92161	High	6.44058	High	6.39964	0
			TSDTGEEEAITnSTEAnGKYVVVSTPEK	N12(Deamidated); N17(Deamidated)	2958.37	0	6.43567e-13	High	4.40067	High	7.27754	High	6.11952	1
			TSDTGEEEAITnSTEAnGK	N12(Deamidated)	1954.84	0	1.605e-05	High	5.74982	High	5.51574	High	5.18091	0
			TQLTCSLnSSGVDIVGHR	C5(Carbamidomethyl); N8(Deamidated)	1944.95	0	8.389e-05	High	5.52433	High	4.85562	High	5.009	0
			SQLTISnLDVnVDPGTYVCnATnAQGTTR	C19(Carbamidomethyl); N20(Deamidated)	3110.48	0	2.475e-09	High	4.51929	High	4.99299	High	5.77335	0
			TQLTCSLnSSGVDIVGHR	Q2(Deamidated); C5(Carbamidomethyl); N8(Deamidated)	1945.93	0	1.311e-07	High	2.33894	High	3.7081	High	2.47191	0
			SQLTISnLDVnVDPGTYVCnATnAQGTTR	C19(Carbamidomethyl); N20(Deamidated); N23(Deamidated)	3111.47	0.008	0.1335			High	2.02417			0
223	P18581	Cationic amino acid transporter 2 OS=Mus musculus GN=Slc7a2 PE=1 SV=3 - [CTR2_MOUSE]	ISEEFLKnISASAR	N8(Deamidated)	1565.82	0	0.0006812			High	2.55631			1
224	P20060	Beta-hexosaminidase subunit beta OS=Mus musculus GN=Hexb PE=2 SV=2 - [HEXB_MOUSE]	TQVFGPVDPTVnTTYAFFnTFFK	N12(Deamidated)	2642.29	0	4.232e-08					High	4.38113	0
225	P21440	Multidrug resistance protein 3 OS=Mus musculus GN=Abcb4 PE=2 SV=2 - [MDR3_MOUSE]	FVDnTGnFSLPVnFSLSMLnPGR	N7(Deamidated); N13(Deamidated); M18(Oxidation)	2544.23	0	1.973e-05	High	3.81562	High	4.11564	High	4.24451	0
			FVDnTGnFSLPVnFSLSMLnPGR	N7(Deamidated); N13(Deamidated)	2528.23	0	0.01561	High	2.73283					0
226	P22599;Q00896;Q00897	Alpha-1-antitrypsin 1-2 OS=Mus musculus GN=Serpina1b PE=1 SV=2 - [A1AT2_MOUSE]	ELVHQSnTSnIFFSPVSIATAFAMLSLGSK	N7(Deamidated); M24(Oxidation)	3213.64	0	0.0001802			High	3.85424	High	3.95373	0
227	P23953	Carboxylesterase 1C OS=Mus musculus GN=Ces1c PE=1 SV=4 - [EST1C_MOUSE]	EGASEEETnLSK	N9(Deamidated)	1294.56	0	0.001071	High	2.65057	High	2.76996	High	2.9838	0
			FHSELnISESMIPAVIEQYLR	N6(Deamidated); M11(Oxidation)	2493.25	0	3.491e-14	High	3.60501	High	5.2178	High	5.71106	0
			nIQAVnEIIATLSQCnDTSSAAMVQCLR	C15(Carbamidomethyl); N16(Deamidated); M23(Oxidation); C26(Carbamidomethyl)	3124.49	0	8.026e-07	High	4.33423	High	4.95603	High	4.74688	0
			nIQAVnEIIATLSQCnDTSSAAMVQCLR	C15(Carbamidomethyl); N16(Deamidated); C26(Carbamidomethyl)	3108.49	0	1.002e-05	High	4.84206	High	4.03701	High	3.63338	0
			KnIQAVnEIIATLSQCnDTSSAAMVQCLR	C16(Carbamidomethyl); N17(Deamidated); M24(Oxidation); C27(Carbamidomethyl)	3252.58	0.001	0.005628			High	2.97285	High	3.18062	1
228	P24638	Lysosomal acid phosphatase OS=Mus musculus GN=Acp2 PE=2 SV=2 - [PPAL_MOUSE]	YEQLQnETR	N6(Deamidated)	1181.55	0	0.0009125	High	2.65712	High	2.38364	High	2.41865	0
			YHGFLnTSYHR	N6(Deamidated)	1395.65	0	0.001071	High	2.62984	High	2.34085	High	2.81565	0
229	P24668	Cation-dependent mannose-6-phosphate receptor OS=Mus musculus GN=M6pr PE=1 SV=1 - [MPRD_MOUSE]	EASnHSSGAGLVQInK	N4(Deamidated); N15(Deamidated)	1613.78	0	2.513e-06	High	2.85768	High	2.85835	High	3.24803	0
			EASnHSSGAGLVQInK	N4(Deamidated)	1612.8	0	1.972e-10	High	3.80024	High	4.34368	High	4.48595	0
230	P25446	Tumor necrosis factor receptor superfamily member 6 OS=Mus musculus GN=Fas PE=1 SV=2 - [TNR6_MOUSE]	ETDKnCSEGLYQGGPFCCQPCQPGK	N5(Deamidated); C6(Carbamidomethyl); C17(Carbamidomethyl); C18(Carbamidomethyl); C21(Carbamidomethyl)	2918.21	0.001	0.0947	High	3.00524	High	3.98208			1
			CTLCDEEHGLEVETnCTLTQnTK	C1(Carbamidomethyl); C4(Carbamidomethyl); N15(Deamidated); C16(Carbamidomethyl)	2753.18	0	0.003136	High	4.05988	High	3.25242			0
			ETDKnCSEGLYQGGPFCCQPCQPGKK	N5(Deamidated); C6(Carbamidomethyl); C17(Carbamidomethyl); C18(Carbamidomethyl); C21(Carbamidomethyl)	3046.29	0.009	0.1499			High	2.74239			2
231	P26151	High affinity immunoglobulin gamma Fc receptor I OS=Mus musculus GN=Fcgr1 PE=1 SV=1 - [FCGR1_MOUSE]	nTSSEYHIAR	N1(Deamidated)	1178.55	0	0.03912	High	2.38844	High	2.49433			0
232	P26262	Plasma kallikrein OS=Mus musculus GN=Klkb1 PE=1 SV=2 - [KLKB1_MOUSE]	LQTPLnYTEFQKPICLPSK	N6(Deamidated); C15(Carbamidomethyl)	2278.19	0	1.154e-13	High	4.15956	High	4.49368	High	5.10733	0
			GSnFnISK	N5(Deamidated)	867.423	0.001	0.0895	High	2.32885	High	2.1498	High	2.01266	0
233	P26618-2	Isoform 2 of Platelet-derived growth factor receptor alpha OS=Mus musculus GN=Pdgfra - [PGFRA_MOUSE]	IVQLnSSFSLR	N5(Deamidated)	1264.69	0	0.0002474			High	2.8393			0
234	P26952-3	Isoform 2 of Interleukin-3 receptor subunit alpha OS=Mus musculus GN=Il3ra - [IL3RA_MOUSE]	AEVLAPPTLTVECnGSEAHAR	C13(Carbamidomethyl); N14(Deamidated)	2223.07	0.001	0.002867					High	2.23228	0
235	P27046	Alpha-mannosidase 2 OS=Mus musculus GN=Man2a1 PE=1 SV=2 - [MA2A1_MOUSE]	GSPGnASQGSIHLHSPQLALQADPR	N5(Deamidated)	2539.27	0	0.002891	High	4.08141	High	4.22905	High	3.53801	0
			DSVInLSESVEDGPR	N5(Deamidated)	1617.77	0	1.538e-10	High	3.37422	High	3.93804	High	3.98095	0
			FAVESLVPSSLSLMHSPPDAQnMSEVSLSPMEISTFR	M14(Oxidation); N22(Deamidated); M23(Oxidation); M31(Oxidation)	4069.93	0	0.0008353			High	2.17106	High	3.15458	0
236	P27656	Hepatic triacylglycerol lipase OS=Mus musculus GN=Lipc PE=2 SV=2 - [LIPC_MOUSE]	IPITLGEGITSnK(T)	N12(Deamidated)	1343.75	0	0.001836	High	3.64262	High	3.36832	High	3.39732	0
			RIPITLGEGITSnK(T)	N13(Deamidated)	1499.85	0	0.0001699	High	3.38313	High	3.79928			1
237	P28653	Biglycan OS=Mus musculus GN=Bgn PE=2 SV=1 - [PGS1_MOUSE]	LLQVVYLHSnnITK	N10(Deamidated)	1642.92	0	8.207e-06	High	4.11314	High	3.78787	High	3.93465	0
			MIEnGSLSFLPTLR	M1(Oxidation); N4(Deamidated)	1594.82	0	2.399e-07	High	3.75113	High	3.82532	High	3.18611	0
238	P28654	Decorin OS=Mus musculus GN=Dcn PE=2 SV=1 - [PGS2_MOUSE]	ISDTnITAIPQGLPTSLTEVHLDGnK	N5(Deamidated)	2735.42	0	2.004e-08	High	4.72284	High	5.15377	High	4.99635	0
			LGLSFnSITVMEnGSLAnVPHLR	M11(Oxidation); N13(Deamidated)	2486.28	0	0.000985			High	2.78494	High	4.20429	0
239	P28665	Murinoglobulin-1 OS=Mus musculus GN=Mug1 PE=1 SV=3 - [MUG1_MOUSE]	SLGnVnFSVSAEAQQSSEPCGSEVATVPETGRK	N6(Deamidated); C20(Carbamidomethyl)	3423.61	0	4.988e-05	High	3.78066	High	4.46171	High	3.75531	1
			YLnETQQLTQK	N3(Deamidated)	1366.69	0	0.003916	High	4.22166	High	4.00143	High	2.7745	0
			nASFVYTK	N1(Deamidated)	930.458	0	0.001786	High	2.39536	High	2.40432	High	2.15876	0
			EVnSQLDnnGCSTQEVnITELQSK	C11(Carbamidomethyl); N17(Deamidated)	2708.24	0	0.0001023	High	4.66134	High	4.13408	High	3.86024	0
			TIEQERnASFVYTK	N7(Deamidated)	1686.84	0	7.208e-05	High	2.66269	High	3.95099	High	3.3404	1
			YLnETQQLTQK	N3(Deamidated); Q6(Deamidated)	1367.67	0	0.0009329	High	3.0174	High	3.14754			0
			SLGnVnFSVSAEAQQSSEPCGSEVATVPETGRK	N4(Deamidated); N6(Deamidated); C20(Carbamidomethyl)	3424.61	0.002	0.0491			High	2.35565			1
			YLnETQQLTQK	N3(Deamidated); Q6(Deamidated); Q7(Deamidated)	1368.66	0.002	0.0348			High	1.8675			0
240	P28666	Murinoglobulin-2 OS=Mus musculus GN=Mug2 PE=2 SV=2 - [MUG2_MOUSE]	EVnSKLDnnGCSTQEVnITELQSK	N9(Deamidated); C11(Carbamidomethyl); N17(Deamidated)	2709.23	0	0.002176	High	4.8922	High	5.05474	High	5.0311	1
			LDnnGCSTQEVnITELQSK	N4(Deamidated); C6(Carbamidomethyl); N12(Deamidated)	2151.97	0	1.347e-10	High	4.53851	High	4.31748	High	4.54733	0
			LDnnGCSTQEVnITELQSK	C6(Carbamidomethyl); N12(Deamidated)	2151	0	5.991e-12	High	3.57109	High	3.16738	High	5.05267	0
			EVnSKLDnnGCSTQEVnITELQSK	C11(Carbamidomethyl); N17(Deamidated)	2708.25	0	4.585e-05	High	4.21389	High	4.49012	High	3.40532	1
			LDnnGCSTQEVnITELQSK	N3(Deamidated); N4(Deamidated); C6(Carbamidomethyl); N12(Deamidated)	2152.97	0	9.437e-07					High	3.74008	0
245	P28798	Granulins OS=Mus musculus GN=Grn PE=1 SV=2 - [GRN_MOUSE]	VGnVECGEGHFCHDnQTCCK	C6(Carbamidomethyl); C12(Carbamidomethyl); N15(Deamidated); C18(Carbamidomethyl); C19(Carbamidomethyl)	2408.91	0.001	0.006547	High	2.31946	High	2.33567			0
			nYTTDLLTK	N1(Deamidated)	1069.54	0.007	0.1239			High	1.93935			0
246	P28843	Dipeptidyl peptidase 4 OS=Mus musculus GN=Dpp4 PE=1 SV=3 - [DPP4_MOUSE]	KLDFIVLnETR	N8(Deamidated)	1348.75	0	3.47e-05	High	4.61613	High	4.52284	High	4.6456	1
			LDFIVLnETR	N7(Deamidated)	1220.66	0	9.853e-05	High	3.50131	High	3.48674	High	3.64076	0
247	P29416	Beta-hexosaminidase subunit alpha OS=Mus musculus GN=Hexa PE=2 SV=2 - [HEXA_MOUSE]	SAEGTFFInK(T)	N9(Deamidated)	1114.55	0	0.02341	High	2.99805	High	2.9073	High	2.91487	0
248	P29477	Nitric oxide synthase, inducible OS=Mus musculus GN=Nos2 PE=1 SV=1 - [NOS2_MOUSE]	LnLSEEQVEDYFFQLKSQKR	N2(Deamidated)	2502.25	0.001	0.1128	High	3.32074					2
249	P29533-2	Isoform 2 of Vascular cell adhesion protein 1 OS=Mus musculus GN=Vcam1 - [VCAM1_MOUSE]	nTTISVHPSTR	N1(Deamidated)	1213.62	0	0.0008353	High	2.24139	High	2.07559	High	2.34911	0
250	P29699	Alpha-2-HS-glycoprotein OS=Mus musculus GN=Ahsg PE=1 SV=1 - [FETUA_MOUSE]	RPFGVVYEMEVDTLETTCHALDPTPLAnCSVR	M9(Oxidation); C18(Carbamidomethyl); N28(Deamidated); C29(Carbamidomethyl)	3694.74	0	1.247e-08	High	3.90033	High	4.29346	High	3.56553	0
			CPLLTPFnDTnVVHTVnTALAAFnTQnnGTYFK	C1(Carbamidomethyl); N24(Deamidated); N27(Deamidated)	3684.79	0	3.825e-05			High	3.6672	High	4.343	0
			CPLLTPFnDTnVVHTVnTALAAFnTQnnGTYFK	C1(Carbamidomethyl); N11(Deamidated); N17(Deamidated); N24(Deamidated)	3685.77	0	0.0008353			High	2.1532	High	5.33231	0
251	P29754	Type-1A angiotensin II receptor OS=Mus musculus GN=Agtr1a PE=1 SV=1 - [AGTRA_MOUSE]	nSTLPIGLGLTK	N1(Deamidated)	1214.7	0	7.332e-05	High	2.93407	High	2.6732	High	3.37937	0
252	P29788	Vitronectin OS=Mus musculus GN=Vtn PE=1 SV=2 - [VTNC_MOUSE]	nGSLFAFR	N1(Deamidated)	912.458	0	0.001937	High	2.57558	High	2.62603	High	2.48809	0
			nISEGFSGIPDnVDAAFALPAHR	N1(Deamidated)	2399.17	0	8.791e-08	High	3.83304	High	4.93288	High	4.53809	0
253	P30204-2	Isoform II of Macrophage scavenger receptor types I and II OS=Mus musculus GN=Msr1 - [MSRE_MOUSE]	FQnFSMATDQR	N3(Deamidated); M6(Oxidation)	1361.58	0	0.0004457	High	2.88756	High	3.3723	High	3.09723	0
			nCLVCSLnTSDTSQGPMEK	C2(Carbamidomethyl); C5(Carbamidomethyl); N8(Deamidated); M17(Oxidation)	2157.91	0	6.35e-07	High	3.45688	High	4.39024	High	2.98758	0
			VLnnITnDLR	N4(Deamidated)	1172.63	0	0.0003989	High	3.25562	High	3.46805	High	3.54941	0
			VLnnITnDLR	N3(Deamidated); N4(Deamidated)	1173.61	0	0.02194	High	2.65562	High	2.79288			0
			FQnFSMATDQR	N3(Deamidated)	1345.59	0.002	0.1235	High	2.3009					0
			nITFIQGPPGPQGEK	N1(Deamidated)	1583.81	0.007	0.1987	High	2.26163					0
			SLQSLnMTLLDVQLHTETLnVR	N6(Deamidated); M7(Oxidation)	2542.32	0	3.565e-08					High	3.95574	0
254	P31649	Sodium- and chloride-dependent GABA transporter 2 OS=Mus musculus GN=Slc6a13 PE=1 SV=1 - [S6A13_MOUSE]	AnDSMnVTSEnATSPVIEFWER	N2(Deamidated); M5(Oxidation); N6(Deamidated); N11(Deamidated)	2516.09	0	5.129e-07	High	3.05201	High	3.6326	High	2.64212	0
			GVTLPGAAQGIQFYLYPnITR	N18(Deamidated)	2280.22	0	1.128e-15			High	5.49804	High	5.69102	0
255	P31809-2	Isoform Short of Carcinoembryonic antigen-related cell adhesion molecule 1 OS=Mus musculus GN=Ceacam1 - [CEAM1_MOUSE]	TLTLLnVTRnDTGPYVCETR	N6(Deamidated); N10(Deamidated); C17(Carbamidomethyl)	2325.15	0	7.898e-05	High	3.11848	High	3.69364	High	3.71774	1
			TLTLLnVTR	N6(Deamidated)	1031.61	0	0.02457	High	3.04946	High	2.75615	High	2.81818	0
			TTVKnITVLEPVTQPFLQVTnTTVK	N5(Deamidated); N21(Deamidated)	2773.53	0	0.0001427	High	3.51117	High	4.37334	High	3.66946	1
			nITVLEPVTQPFLQVTnTTVK	N1(Deamidated); N17(Deamidated)	2344.27	0	5.669e-09	High	5.21712	High	5.27597	High	4.95607	0
			nDTGPYVCETR	N1(Deamidated); C8(Carbamidomethyl)	1312.55	0	0.004875	High	3.85011	High	3.74698	High	3.47467	0
			nITVLEPVTQPFLQVTnTTVK	N1(Deamidated); Q10(Deamidated); N17(Deamidated)	2345.26	0	5.722e-07	High	3.97748	High	4.19808			0
			FVPnSnMnFTGQAYSGR	N8(Deamidated)	1890.85	0	9.109e-08	High	4.4994	High	4.2571	High	3.20352	0
			FVPnSnMnFTGQAYSGR	N6(Deamidated); M7(Oxidation); N8(Deamidated)	1907.83	0	2.058e-09	High	4.31431	High	4.56728	High	4.02989	0
			EIIYSnGSLLFQMITMK	N6(Deamidated); M13(Oxidation); M16(Oxidation)	2021.01	0	0.000127	High	4.70047	High	4.69896	High	4.67128	0
			MTLSQnnSILR	N6(Deamidated)	1277.65	0	0.0007473	High	3.68962	High	2.44639	High	1.98074	0
			GnTTAIDKEIAR	N2(Deamidated)	1289.67	0	4.883e-05	High	3.44519	High	3.71119	High	3.60698	1
			FVPnSnMnFTGQAYSGR	M7(Oxidation); N8(Deamidated)	1906.84	0	2.046e-05	High	4.61763	High	4.56095	High	4.56587	0
			MTLSQnnSILR	M1(Oxidation); N6(Deamidated)	1293.65	0	0.008783	High	3.65121	High	3.72149	High	3.54821	0
			MTLSQnnSILR	M1(Oxidation); N6(Deamidated); N7(Deamidated)	1294.63	0	0.0001798			High	3.00032			0
			FVPnSnMnFTGQAYSGR	N6(Deamidated); N8(Deamidated)	1891.83	0	0.001223	High	3.95792					0
			MTLSQnnSILR	N6(Deamidated); N7(Deamidated)	1278.64	0	0.007189	High	3.45296					0
256	P31809-3	Isoform 3 of Carcinoembryonic antigen-related cell adhesion molecule 1 OS=Mus musculus GN=Ceacam1 - [CEAM1_MOUSE]	FHVHQPVTQPFLQVTnTTVK	N16(Deamidated)	2322.23	0	1.737e-09	High	5.14957	High	5.68387	High	5.79791	0
257	P31996-2	Isoform Short of Macrosialin OS=Mus musculus GN=Cd68 - [CD68_MOUSE]	ELQAPLGQSFCCGnASIVLSPAVHLDLLSLR	C11(Carbamidomethyl); C12(Carbamidomethyl); N14(Deamidated)	3366.74	0	0.0002426					High	4.46037	0
258	P32507-2	Isoform Alpha of Nectin-2 OS=Mus musculus GN=Pvrl2 - [PVRL2_MOUSE]	VEDEGnYTCEFATFPnGTR	N6(Deamidated); C9(Carbamidomethyl); N16(Deamidated)	2208.91	0	0.0001263	High	4.80058	High	4.80066	High	4.60242	0
			MVnTTFICTATnAVGTGR	M1(Oxidation); N3(Deamidated); C8(Carbamidomethyl)	1930.9	0.001	0.002758					High	2.81458	0
259	P33587	Vitamin K-dependent protein C OS=Mus musculus GN=Proc PE=1 SV=2 - [PROC_MOUSE]	EILVHPnYTR	N7(Deamidated)	1242.65	0	0.0009339	High	2.78241	High	2.58251	High	2.62172	0
260	P34927	Asialoglycoprotein receptor 1 OS=Mus musculus GN=Asgr1 PE=2 SV=4 - [ASGR1_MOUSE]	QnFSnLTVSTEDQVK	N5(Deamidated)	1710.82	0	1.511e-05	High	2.75889	High	2.83656	High	2.86499	0
			QnFSnLTVSTEDQVK	N2(Deamidated); N5(Deamidated)	1711.81	0	0.000249	High	4.05333	High	4.04449	High	3.8396	0
			QnFSnLTVSTEDQVK	Q1(Deamidated); N2(Deamidated); N5(Deamidated)	1712.79	0	6.684e-06	High	2.73776	High	3.09818			0
261	P35330	Intercellular adhesion molecule 2 OS=Mus musculus GN=Icam2 PE=1 SV=1 - [ICAM2_MOUSE]	InCSTnCAAPDMGGLETPTnK	N2(Deamidated); C3(Carbamidomethyl); C7(Carbamidomethyl); M12(Oxidation)	2267.96	0	4.589e-08	High	3.11157	High	3.96478	High	3.44907	0
262	P35441	Thrombospondin-1 OS=Mus musculus GN=Thbs1 PE=1 SV=1 - [TSP1_MOUSE]	GCSSSTnVLLTLDnnVVnGSSPAIR	C2(Carbamidomethyl); N18(Deamidated)	2576.27	0	1.199e-08			High	4.07711	High	2.07334	0
			VVnSTTGPGEHLR	N3(Deamidated)	1367.69	0	0.0004436	High	2.26028	High	2.8332	High	3.03971	0
			KVSCPIMPCSnATVPDGECCPR	C4(Carbamidomethyl); M7(Oxidation); C9(Carbamidomethyl); N11(Deamidated); C19(Carbamidomethyl); C20(Carbamidomethyl)	2552.07	0	0.0002212	High	1.90679	High	2.11606	High	2.92746	1
			VSCPIMPCSnATVPDGECCPR	C3(Carbamidomethyl); M6(Oxidation); C8(Carbamidomethyl); N10(Deamidated); C18(Carbamidomethyl); C19(Carbamidomethyl)	2423.98	0	0.0001896	High	2.28072	High	3.29763			0
263	P35803-5	Isoform 5 of Neuronal membrane glycoprotein M6-b OS=Mus musculus GN=Gpm6b - [GPM6B_MOUSE]	SPQSnGTSGVEQICVDVR	N5(Deamidated); C14(Carbamidomethyl)	1933.9	0	1.452e-07	High	2.7004	High	4.00988			0
264	P35822	Receptor-type tyrosine-protein phosphatase kappa OS=Mus musculus GN=Ptprk PE=1 SV=1 - [PTPRK_MOUSE]	LGDVEVnAGQnATFQCIATGR	N11(Deamidated); C16(Carbamidomethyl)	2222.07	0	0.001465	High	4.15543	High	4.48818	High	3.18536	0
265	P35917	Vascular endothelial growth factor receptor 3 OS=Mus musculus GN=Flt4 PE=1 SV=1 - [VGFR3_MOUSE]	ADnYTYEHLR	N3(Deamidated)	1282.57	0	0.001982	High	2.75003	High	2.78661	High	2.73015	0
			LTQnLTDLLVnVSDSLEMR	Q3(Deamidated); N11(Deamidated); M18(Oxidation)	2179.09	0	0.001071					High	3.40444	0
266	P35918-2	Isoform 2 of Vascular endothelial growth factor receptor 2 OS=Mus musculus GN=Kdr - [VGFR2_MOUSE]	VVGnDTGAYK	N4(Deamidated)	1024.5	0.002	0.03561			High	1.61802			0
267	P35951	Low-density lipoprotein receptor OS=Mus musculus GN=Ldlr PE=1 SV=2 - [LDLR_MOUSE]	DMSDELGCVnVTQCDGPnK	M2(Oxidation); C8(Carbamidomethyl); N10(Deamidated); C14(Carbamidomethyl)	2155.87	0	2.39e-07	High	3.54674	High	2.96434			0
268	P41233	ATP-binding cassette sub-family A member 1 OS=Mus musculus GN=Abca1 PE=1 SV=4 - [ABCA1_MOUSE]	EAFnETnQAIQTISR	N4(Deamidated)	1722.84	0	1.212e-08	High	4.42973	High	4.94432	High	4.55785	0
			GEnPSQYGITAFnHPLnLTK	N17(Deamidated)	2202.09	0	1.4e-07	High	2.41067	High	4.80186	High	4.58744	0
			YPTPGEAPGVVGnFnK	N15(Deamidated)	1647.81	0	8.943e-06	High	3.84704	High	3.42627	High	3.84511	0
			VFLQGYQLHLASLCnGSK	C14(Carbamidomethyl); N15(Deamidated)	2036.03	0	0.0001349	High	2.3973	High	2.65725	High	3.35959	0
			nPEDVQSPnGSVYTWR	N9(Deamidated)	1849.84	0	0.06006	High	2.92563					0
269	P41731	CD63 antigen OS=Mus musculus GN=Cd63 PE=1 SV=2 - [CD63_MOUSE]	DRVPDSCCInITVGCGnDFK	C7(Carbamidomethyl); C8(Carbamidomethyl); N10(Deamidated); C15(Carbamidomethyl)	2328.01	0	0.001713	High	2.74867	High	2.85583			1
270	P42227-2	Isoform Stat3B of Signal transducer and activator of transcription 3 OS=Mus musculus GN=Stat3 - [STAT3_MOUSE]	SQGDMQDLnGnnQSVTR	M5(Oxidation); N12(Deamidated)	1880.81	0.003	0.02509					High	2.08755	0
271	P42703	Leukemia inhibitory factor receptor OS=Mus musculus GN=Lifr PE=1 SV=1 - [LIFR_MOUSE]	IEGLTnETYR	N6(Deamidated)	1196.58	0	0.001071	High	2.48855	High	2.67437	High	2.86103	0
			KVPSnSTETVIESDQFQPGVR	N5(Deamidated)	2319.16	0	1.167e-05	High	2.60413	High	3.44952	High	1.9151	1
			VPSnSTETVIESDQFQPGVR	N4(Deamidated)	2191.06	0	4.67e-07	High	3.28464	High	3.96238			0
			KVPSnSTETVIESDQFQPGVR	N5(Deamidated); Q15(Deamidated)	2320.15	0.001	0.01064			High	3.45221			1
			LKnITDISQK	N3(Deamidated)	1160.65	0.003	0.05168	High	2.44659					1
272	P43006-3	Isoform Glt-1B of Excitatory amino acid transporter 2 OS=Mus musculus GN=Slc1a2 - [EAA2_MOUSE]	KVLVAPPSEEAnTTK	N12(Deamidated)	1584.85	0	7.309e-05	High	2.51616	High	3.38914	High	3.29878	1
			VLVAPPSEEAnTTK	N11(Deamidated)	1456.76	0	3.706e-06	High	2.15726	High	2.92333	High	2.66992	0
			AVISMLnETMnEAPEETK	M5(Oxidation); N7(Deamidated); M10(Oxidation)	2039.92	0	1.002e-09	High	4.64201	High	4.0581	High	5.20695	0
			AVISMLnETMnEAPEETK	N7(Deamidated); M10(Oxidation)	2023.93	0	0.005853	High	2.99467					0
273	P46978	Dolichyl-diphosphooligosaccharide--protein glycosyltransferase subunit STT3A OS=Mus musculus GN=Stt3a PE=1 SV=1 - [STT3A_MOUSE]	TILVDnnTWnnTHISR	N10(Deamidated)	1898.94	0	1.125e-09	High	4.16576	High	4.58278	High	4.73897	0
274	P47801	Epithelial membrane protein 1 OS=Mus musculus GN=Emp1 PE=1 SV=2 - [EMP1_MOUSE]	nCTGGnCDGSLSYGnEDAIK	N1(Deamidated); C2(Carbamidomethyl); C7(Carbamidomethyl)	2132.86	0	2.626e-11	High	3.01815	High	4.66018	High	4.37946	0
275	P49182	Heparin cofactor 2 OS=Mus musculus GN=Serpind1 PE=1 SV=1 - [HEP2_MOUSE]	nGnMSGISDQR	N1(Deamidated); N3(Deamidated); M4(Oxidation)	1196.49	0	2.441e-05			High	2.50427	High	2.17149	0
			nGnMSGISDQR	N3(Deamidated); M4(Oxidation)	1195.51	0.001	0.009561			High	2.15273			0
276	P50247	Adenosylhomocysteinase OS=Mus musculus GN=Ahcy PE=1 SV=3 - [SAHH_MOUSE]	VPAInVnDSVTK	N7(Deamidated)	1257.67	0	0.001071	High	2.57386			High	3.15136	0
277	P50608	Fibromodulin OS=Mus musculus GN=Fmod PE=2 SV=1 - [FMOD_MOUSE]	LYLDHnnLTR	N7(Deamidated)	1259.64	0.001	0.004131	High	1.93353	High	2.05863	High	1.91131	0
278	P51885	Lumican OS=Mus musculus GN=Lum PE=1 SV=2 - [LUM_MOUSE]	KLHInYnnLTESVGPLPK	N8(Deamidated)	2038.1	0	1.334e-06	High	5.44404	High	4.99455	High	5.45003	1
279	P52430	Serum paraoxonase/arylesterase 1 OS=Mus musculus GN=Pon1 PE=1 SV=2 - [PON1_MOUSE]	ITVVYAEnGTVLQGTTVASVYK	N8(Deamidated)	2314.23	0	1.093e-09	High	5.10445	High	4.73771	High	5.72237	0
			HAnWTLTPLK	N3(Deamidated)	1181.63	0	0.01958	High	3.52742	High	3.05261	High	2.73598	0
280	P52795	Ephrin-B1 OS=Mus musculus GN=Efnb1 PE=1 SV=1 - [EFNB1_MOUSE]	YHDYYITSTSnGSLEGLEnR	N11(Deamidated)	2320.04	0	6.1e-13	High	4.60177	High	3.91542	High	4.82806	0
281	P54751	CMP-N-acetylneuraminate-beta-galactosamide-alpha-2,3-sialyltransferase 1 OS=Mus musculus GN=St3gal1 PE=2 SV=1 - [SIA4A_MOUSE]	KPnnLSDTVK	N4(Deamidated)	1116.59	0.001	0.001716	High	2.14395	High	2.16197	High	2.50729	0
			TGVHDGDFEYnITTTLAAInK	N11(Deamidated)	2281.11	0	9.296e-06	High	6.21432	High	6.17426	High	5.98626	0
282	P55065	Phospholipid transfer protein OS=Mus musculus GN=Pltp PE=1 SV=1 - [PLTP_MOUSE]	VSnVSCEASVSK	N3(Deamidated); C6(Carbamidomethyl)	1267.59	0	0.000158	High	3.02591	High	2.80073	High	3.32017	0
			GHFYYnISDVR	N6(Deamidated)	1371.64	0	0.001071	High	3.00866	High	3.11627	High	3.37449	0
283	P55284	Cadherin-5 OS=Mus musculus GN=Cdh5 PE=1 SV=2 - [CADH5_MOUSE]	nEDSnFTLInnHDnTAnITVK	N11(Deamidated); N14(Deamidated)	2376.1	0	0.002057	High	3.01772	High	3.0884	High	3.58908	0
284	P55292-2	Isoform 2B of Desmocollin-2 OS=Mus musculus GN=Dsc2 - [DSC2_MOUSE]	nGIYnITVLALDADGR	N1(Deamidated); N5(Deamidated)	1706.87	0	0.0004775	High	4.2691	High	3.73602	High	3.63873	0
			nGIYnITVLALDADGR	N5(Deamidated)	1705.87	0	3.413e-05			High	3.35436			0
285	P55772	Ectonucleoside triphosphate diphosphohydrolase 1 OS=Mus musculus GN=Entpd1 PE=2 SV=1 - [ENTP1_MOUSE]	VVnVSELYGTPCTK	N3(Deamidated); C12(Carbamidomethyl)	1567.77	0	6.792e-06	High	3.18355	High	3.95028	High	2.88585	0
			WPAEKEnDTGVVQQLEECQVK	N7(Deamidated); C18(Carbamidomethyl)	2488.17	0	0.01887	High	3.33725					1
286	P56528	ADP-ribosyl cyclase/cyclic ADP-ribose hydrolase 1 OS=Mus musculus GN=Cd38 PE=1 SV=2 - [CD38_MOUSE]	EPFYKnSTFGSVEVFSLDPnK	N6(Deamidated)	2406.17	0	0.0002756	High	2.24392	High	3.49903	High	3.04799	1
			nSTFGSVEVFSLDPnK	N1(Deamidated)	1741.83	0	9.911e-12	High	3.63645	High	3.83338	High	4.12217	0
			LVTQTIPCnK(T)	C8(Carbamidomethyl); N9(Deamidated)	1174.62	0	0.0001577	High	2.51183	High	3.37946	High	2.90658	0
			nPCnITR	C3(Carbamidomethyl); N4(Deamidated)	875.41	0.001	0.0712	High	2.66184			High	2.54031	0
287	P57716	Nicastrin OS=Mus musculus GN=Ncstn PE=1 SV=3 - [NICA_MOUSE]	LLnATHQIGCQSSISGDTGVIHVVEKEEDLK	N3(Deamidated); C10(Carbamidomethyl)	3378.69	0	4.098e-07	High	3.47134	High	5.00974	High	5.0613	1
			KIYIPLnK(T)	N7(Deamidated)	989.605	0.001	0.01139			High	2.76902	High	2.46254	1
			nISGVVLADHSGSFHnR	N1(Deamidated)	1810.88	0	1.164e-08			High	2.02004	High	2.21186	0
			SYLDDRPLQHYIAVSSPTnTTYVVQYALAnLTGK	N19(Deamidated); N30(Deamidated)	3800.93	0	2.258e-12					High	5.68371	0
288	P57757	Cystinosin OS=Mus musculus GN=Ctns PE=1 SV=1 - [CTNS_MOUSE]	SKnLTIVELPDEVIVPR	N3(Deamidated)	1923.09	0	1.77e-08	High	3.34576	High	4.40528	High	3.29672	1
289	P59383	Leucine-rich repeat neuronal protein 4 OS=Mus musculus GN=Lrrn4 PE=1 SV=2 - [LRRN4_MOUSE]	SGnQSVVDIYATAR	N3(Deamidated)	1481.73	0	3.085e-05	High	3.57947	High	3.65764	High	3.45047	0
290	P63038	60 kDa heat shock protein, mitochondrial OS=Mus musculus GN=Hspd1 PE=1 SV=1 - [CH60_MOUSE]	LVQDVAnnTnEEAGDGTTTATVLAR	N8(Deamidated)	2561.25	0	4.848e-07					High	4.76581	0
291	P63044	Vesicle-associated membrane protein 2 OS=Mus musculus GN=Vamp2 PE=1 SV=2 - [VAMP2_MOUSE]	MSATAATVPPAAPAGEGGPPAPPPnLTSnR	N25(Deamidated); N29(Deamidated)	2799.38	0.007	0.1173					High	1.76954	0
292	P70158	Acid sphingomyelinase-like phosphodiesterase 3a OS=Mus musculus GN=Smpdl3a PE=2 SV=2 - [ASM3A_MOUSE]	IISLnTnLYYGPnIMTLnK(T)	M15(Oxidation); N18(Deamidated)	2199.15	0.001	0.002609					High	3.53344	0
293	P70194	C-type lectin domain family 4 member F OS=Mus musculus GN=Clec4f PE=2 SV=1 - [CLC4F_MOUSE]	LRDYEEnSSSCHK	N7(Deamidated); C11(Carbamidomethyl)	1625.7	0	7.154e-05	High	2.64591	High	3.59919	High	3.14986	1
			SSTEnTSAELHVLGR	N5(Deamidated)	1601.78	0	7.193e-11	High	3.62327	High	4.06459	High	4.71491	0
			GSnnSGHDnHSQFVR	N4(Deamidated); N9(Deamidated)	1657.7	0	9.527e-06	High	3.40381	High	3.82445	High	3.65226	0
			GSnnSGHDnHSQFVR	N4(Deamidated)	1656.72	0	0.0008353	High	2.51228	High	2.97938	High	3.32479	0
			YQMDnVSSLVQLLGSHLEDVnADILQTK	M3(Oxidation); N21(Deamidated)	3147.57	0	5.256e-06			High	4.88938	High	4.71559	0
			GSLQSAnDLSSQTQGFLQHSMDnISAQIQTVR	M21(Oxidation); N23(Deamidated)	3478.66	0	1.846e-08			High	4.6021	High	5.17434	0
			GSnnSGHDnHSQFVR	N3(Deamidated); N4(Deamidated); N9(Deamidated)	1658.69	0	0.06795	High	1.78491			High	2.5497	0
			GSLQSAnDLSSQTQGFLQHSMDnISAQIQTVR	N23(Deamidated)	3462.69	0	0.01166	High	2.86903					0
294	P70206	Plexin-A1 OS=Mus musculus GN=Plxna1 PE=1 SV=1 - [PLXA1_MOUSE]	LSGnLTLLR	N4(Deamidated)	987.585	0	0.000272			High	2.96169			0
295	P70302	Stromal interaction molecule 1 OS=Mus musculus GN=Stim1 PE=1 SV=2 - [STIM1_MOUSE]	LAVTnTTMTGTVLK	N5(Deamidated); M8(Oxidation)	1466.78	0	1.783e-11	High	3.75137	High	4.59065	High	4.62202	0
			LAVTnTTMTGTVLK	N5(Deamidated)	1450.79	0	0.0005673	High	3.99914					0
296	P70389	Insulin-like growth factor-binding protein complex acid labile subunit OS=Mus musculus GN=Igfals PE=2 SV=1 - [ALS_MOUSE]	nnSLQTFVPQPGLER	N1(Deamidated)	1700.87	0	0.001718	High	2.78438	High	2.68753	High	2.97584	0
			FVQTVCEGDDCQPVYTYnnITCAGPAnVSGLDLR	C6(Carbamidomethyl); C11(Carbamidomethyl); N18(Deamidated); C22(Carbamidomethyl)	3834.73	0	0.001172			High	3.02494			0
297	P70665-2	Isoform 2 of Sialate O-acetylesterase OS=Mus musculus GN=Siae - [SIAE_MOUSE]	nSSDYGFPEIR	N1(Deamidated)	1285.57	0	0.001071	High	2.75881	High	3.23929	High	3.26971	0
			nLTFQGPLPK	N1(Deamidated)	1115.61	0	0.06298	High	2.74569			High	2.3488	0
			AVAYGEKnLTFQGPLPK	N8(Deamidated)	1833.98	0	5.524e-06					High	4.55361	1
298	P70699	Lysosomal alpha-glucosidase OS=Mus musculus GN=Gaa PE=1 SV=2 - [LYAG_MOUSE]	GVFITnETGQPLIGK	N6(Deamidated)	1574.85	0	0.0007572	High	4.1682	High	3.62519	High	3.61288	0
			LEnLSSTESGYTATLTR	N3(Deamidated)	1843.9	0	6.453e-08	High	3.48688	High	3.66573	High	3.66124	0
			EVTVLGVATAPTQVLSnGIPVSnFTYSPDnK	N23(Deamidated)	3219.66	0	1.052e-07			High	3.42005	High	3.88856	0
			QVVEnMTR	N5(Deamidated)	977.474	0.001	0.1111	High	1.78511					0
			RGVFITnETGQPLIGK	N7(Deamidated)	1730.95	0.008	0.1539					High	2.80066	1
299	P82349	Beta-sarcoglycan OS=Mus musculus GN=Sgcb PE=1 SV=1 - [SGCB_MOUSE]	ITSnATSDLnIK	N4(Deamidated)	1277.66	0	1.676e-05	High	3.30339	High	3.44382	High	2.92299	0
300	P97333	Neuropilin-1 OS=Mus musculus GN=Nrp1 PE=1 SV=2 - [NRP1_MOUSE]	RGPECSQnYTAPTGVIK	C5(Carbamidomethyl); N8(Deamidated)	1878.91	0	0.002011	High	3.12798	High	2.89285	High	3.92748	1
			EGFSAnYSVLQSSISEDFK	N6(Deamidated)	2108.98	0	2.65e-07	High	3.21882			High	3.13696	0
301	P97370	Sodium/potassium-transporting ATPase subunit beta-3 OS=Mus musculus GN=Atp1b3 PE=1 SV=1 - [AT1B3_MOUSE]	EEnATIATYPEFGVLDLK	N3(Deamidated)	2011	0	4.629e-08	High	4.53341	High	4.72031	High	4.28144	0
			nLTSCPDGAPFIQHGPDYR	N1(Deamidated); C5(Carbamidomethyl)	2145.98	0	7.15e-08	High	3.13333	High	3.98062	High	3.89153	0
			LVEDLESFLKPYSVEEQKnLTSCPDGAPFIQHGPDYR	N19(Deamidated); C23(Carbamidomethyl)	4280.06	0	0.0004101			High	4.02823	High	3.73952	1
302	P97449	Aminopeptidase N OS=Mus musculus GN=Anpep PE=1 SV=4 - [AMPN_MOUSE]	nPnnnTIHPnLR	N4(Deamidated); N5(Deamidated)	1405.68	0	0.0004374	High	2.2585	High	3.09902	High	1.86135	0
			nPnnnTIHPnLR	N4(Deamidated)	1404.7	0	0.0004048	High	3.13418	High	2.58348	High	3.09553	0
			SGQEDHYWLDVEKnQSAK	N14(Deamidated)	2134.98	0	2.687e-06	High	3.04476	High	3.60964	High	3.12347	1
			nATLVnEADK	N1(Deamidated)	1075.53	0	0.002569	High	2.65721	High	2.2513	High	2.5094	0
			nATLVnEADKLR	N1(Deamidated)	1344.72	0	0.0003619	High	2.94212	High	3.38298	High	3.11366	1
			KLnYTLK	N3(Deamidated)	880.516	0.006	0.1012			High	2.07642	High	2.23919	1
303	P97751	Vasoactive intestinal polypeptide receptor 1 OS=Mus musculus GN=Vipr1 PE=1 SV=3 - [VIPR1_MOUSE]	QQCLEEAQLEnETTGCSK	C3(Carbamidomethyl); N11(Deamidated); C16(Carbamidomethyl)	2125.91	0	8.497e-10	High	4.17456	High	4.73576	High	2.74843	0
304	P97785-2	Isoform 2 of GDNF family receptor alpha-1 OS=Mus musculus GN=Gfra1 - [GFRA1_MOUSE]	SnVSGSTHLCLSDnDYGK	N2(Deamidated); C10(Carbamidomethyl)	1954.85	0	0.0003661	High	4.4486	High	4.15834	High	3.87048	0
			ETnFSLTSGLEAK	N3(Deamidated)	1397.68	0	0.003005	High	3.55929					0
305	P97792-2	Isoform 2 of Coxsackievirus and adenovirus receptor homolog OS=Mus musculus GN=Cxadr - [CXAR_MOUSE]	SGDASInVTnLQLSDIGTYQCK	N7(Deamidated); C21(Carbamidomethyl)	2385.14	0	1.55e-08	High	4.88647	High	4.18948	High	4.48253	0
			nASSEYSGTYSCTVQnR	N1(Deamidated); C12(Carbamidomethyl)	1924.8	0	4.513e-09	High	4.2736	High	4.1514	High	4.74063	0
306	P97798-5	Isoform 5 of Neogenin OS=Mus musculus GN=Neo1 - [NEO1_MOUSE]	TPASDPHGDnLTYSVFYTK	N10(Deamidated)	2113.99	0	3.915e-11	High	3.40475	High	2.91029	High	3.63182	0
307	P97821	Dipeptidyl peptidase 1 OS=Mus musculus GN=Ctsc PE=2 SV=1 - [CATC_MOUSE]	SDInCSVMEATEEK	N4(Deamidated); C5(Carbamidomethyl); M8(Oxidation)	1629.67	0	1.262e-07	High	4.3075	High	4.49091	High	4.34492	0
			SDInCSVMEATEEK	N4(Deamidated); C5(Carbamidomethyl)	1613.67	0	0.001659	High	3.85211					0
308	P98064	Mannan-binding lectin serine protease 1 OS=Mus musculus GN=Masp1 PE=1 SV=2 - [MASP1_MOUSE]	FGYILHTDnR(T)	N9(Deamidated)	1236.6	0	0.0003866			High	2.87775			0
309	P98086	Complement C1q subcomponent subunit A OS=Mus musculus GN=C1qa PE=1 SV=2 - [C1QA_MOUSE]	VLTnQESPYQnHTGR	N11(Deamidated)	1744.83	0	0.0008353	High	3.40216	High	3.27245	High	3.29666	0
310	Q00896;P22599;Q00897	Alpha-1-antitrypsin 1-3 OS=Mus musculus GN=Serpina1c PE=1 SV=2 - [A1AT3_MOUSE]	GDTHTQILEGLQFnLTQTSEADIHK	N14(Deamidated)	2797.38	0	4.713e-09	High	5.31134	High	5.85692	High	5.93166	0
			GDTHTQILEGLQFnLTQTSEADIHK	Q6(Deamidated); Q12(Deamidated); N14(Deamidated)	2799.32	0.001	0.001072					High	2.4107	0
311	Q01339	Beta-2-glycoprotein 1 OS=Mus musculus GN=Apoh PE=1 SV=1 - [APOH_MOUSE]	DYRPSAGnnSLYQDTVVFK	N8(Deamidated)	2175.04	0	3.2e-05	High	4.52477	High	4.69622	High	4.82696	0
			nISFACnPGFFLnGTSSSK	C6(Carbamidomethyl); N7(Deamidated); N13(Deamidated)	2049.93	0	6.228e-08	High	4.59563	High	5.36436	High	4.83684	0
			YTSFEYPKnISFACnPGFFLnGTSSSK	C14(Carbamidomethyl); N15(Deamidated); N21(Deamidated)	3065.39	0	0.007127	High	3.3056	High	2.81208	High	2.91287	1
			YTSFEYPKnISFACnPGFFLnGTSSSK	C14(Carbamidomethyl); N21(Deamidated)	3064.42	0.002	0.01173					High	2.49134	1
312	Q02013	Aquaporin-1 OS=Mus musculus GN=Aqp1 PE=1 SV=3 - [AQP1_MOUSE]	nQTLVQDnVK	N1(Deamidated)	1159.6	0	0.06651	High	2.50217	High	2.5968	High	2.71222	0
313	Q02788	Collagen alpha-2(VI) chain OS=Mus musculus GN=Col6a2 PE=2 SV=3 - [CO6A2_MOUSE]	nMTLFSDLVAEK	N1(Deamidated); M2(Oxidation)	1384.67	0	2.509e-05	High	3.32143	High	3.87552	High	3.60076	0
			MALLQYGSQnQQQVAFPLTYnVTTIHEALER	M1(Oxidation); N21(Deamidated)	3580.8	0	2.56e-09			High	5.46311			0
314	Q03142-2	Isoform 2 of Fibroblast growth factor receptor 4 OS=Mus musculus GN=Fgfr4 - [FGFR4_MOUSE]	TTDInSSEVEVLYLR	N5(Deamidated)	1739.87	0	0.001549	High	3.79471					0
315	Q03311	Cholinesterase OS=Mus musculus GN=Bche PE=2 SV=2 - [CHLE_MOUSE]	YGHPnGTQGnSTMWPVFTSTEQK	N5(Deamidated); N10(Deamidated); M13(Oxidation)	2585.14	0	0.02414	High	2.70971	High	2.71471	High	2.72297	0
			DnDSLITR	N2(Deamidated)	934.45	0	0.02276	High	3.35031	High	3.09907	High	2.97873	0
316	Q03734	Serine protease inhibitor A3M OS=Mus musculus GN=Serpina3m PE=1 SV=2 - [SPA3M_MOUSE]	LInDYVSnQTQGMIK	N8(Deamidated); M13(Oxidation)	1740.85	0	2.628e-07	High	3.94694	High	4.20897	High	4.27771	0
			YTGnASALFILPDQGR	N4(Deamidated)	1723.87	0	1.104e-07	High	3.50376	High	3.91475	High	3.19281	0
317	Q04592	Proprotein convertase subtilisin/kexin type 5 OS=Mus musculus GN=Pcsk5 PE=1 SV=3 - [PCSK5_MOUSE]	ETFLLnTTCVK	N6(Deamidated); C9(Carbamidomethyl)	1326.66	0.001	0.004921	High	2.01993	High	2.64926	High	1.66799	0
318	Q05186	Reticulocalbin-1 OS=Mus musculus GN=Rcn1 PE=1 SV=1 - [RCN1_MOUSE]	VVRPDSELGERPPEDnQSFQYDHEAFLGK	N16(Deamidated)	3360.58	0	0.0008353	High	2.41631	High	2.76697	High	3.27271	0
319	Q05685	Folate receptor beta OS=Mus musculus GN=Folr2 PE=2 SV=1 - [FOLR2_MOUSE]	nACCSVnTSQELHK	C3(Carbamidomethyl); C4(Carbamidomethyl); N7(Deamidated)	1648.71	0	6.373e-06	High	3.00002	High	3.91769	High	3.93344	0
320	Q05793	Basement membrane-specific heparan sulfate proteoglycan core protein OS=Mus musculus GN=Hspg2 PE=1 SV=1 - [PGBM_MOUSE]	SLTQGSLIVGnLAPVnGTSQGK	N16(Deamidated)	2142.15	0	1.277e-06	High	3.46646	High	5.02553	High	3.77936	0
321	Q06770	Corticosteroid-binding globulin OS=Mus musculus GN=Serpina6 PE=1 SV=1 - [CBG_MOUSE]	DLFTnQSDFADTTK	N5(Deamidated)	1603.72	0	4.333e-05	High	4.45298	High	4.34727	High	4.16274	0
			LPFSPEnTREEDFYVnETSTVK	N16(Deamidated)	2603.22	0	0.001071	High	3.31187	High	2.5991	High	3.45352	1
			VPMMVQSGnISYFR	M3(Oxidation); M4(Oxidation); N9(Deamidated)	1661.77	0	1.323e-05			High	2.49868	High	3.43012	0
			EEDFYVnETSTVK	N7(Deamidated)	1561.7	0.006	0.1082			High	2.50662			0
			GSTQYLEnLGFnMSK	N12(Deamidated); M13(Oxidation)	1705.78	0.002	0.01793					High	1.98877	0
322	Q06890	Clusterin OS=Mus musculus GN=Clu PE=1 SV=1 - [CLUS_MOUSE]	QELnDSLQVAER	N4(Deamidated)	1402.68	0	0.001071	High	3.20045	High	2.98655	High	3.2012	0
323	Q07113	Cation-independent mannose-6-phosphate receptor OS=Mus musculus GN=Igf2r PE=1 SV=1 - [MPRI_MOUSE]	SLLEFnTTMGCQPSDSQHR	N6(Deamidated); M9(Oxidation); C11(Carbamidomethyl)	2224.97	0	3.241e-08	High	2.99254	High	2.78739	High	4.13174	0
			ISTnITLVCKPGDLESAPVLR	N4(Deamidated); C9(Carbamidomethyl)	2284.23	0	1.479e-09	High	2.7639	High	3.54489	High	4.41857	0
			AGInASYSEK	N4(Deamidated)	1040.49	0	0.001498	High	2.11689	High	2.38616	High	2.76443	0
			DAGVGFPEYQEEDnSTYnFR	N14(Deamidated)	2338.97	0	1.719e-08	High	3.35971	High	4.53102	High	3.51192	0
			DPSSGFVFnLSPLnDSAQGHVVLGIGK	N14(Deamidated)	2756.41	0	0.03771	High	3.82167	High	4.54701	High	2.96575	0
			SLSPHAGTEPCPPEAAVCLLnGSKPVnLGK	C11(Carbamidomethyl); C18(Carbamidomethyl); N21(Deamidated)	3101.55	0	0.01778	High	2.98116	High	3.26218	High	4.26805	0
			MSVInFECnK(T)	M1(Oxidation); C8(Carbamidomethyl); N9(Deamidated)	1258.54	0	0.0001354	High	2.45861	High	2.76109			0
			nGSSIIDLSPLIHR	N1(Deamidated)	1522.83	0	1.163e-05			High	3.70074	High	3.4452	0
			AACAVRPQEVTMVnGTLTnPVTGK	C3(Carbamidomethyl); M12(Oxidation); N14(Deamidated)	2531.27	0	0.001071					High	3.11604	0
324	Q07456	Protein AMBP OS=Mus musculus GN=Ambp PE=2 SV=2 - [AMBP_MOUSE]	KEDSCQLnYSEGPCLGMQER	C5(Carbamidomethyl); N8(Deamidated); C14(Carbamidomethyl); M17(Oxidation)	2418.01	0	0.001341	High	4.47586	High	3.55276	High	3.96465	1
			EDSCQLnYSEGPCLGMQER	C4(Carbamidomethyl); N7(Deamidated); C13(Carbamidomethyl); M16(Oxidation)	2289.92	0	4.985e-10	High	2.7031	High	4.04525	High	4.05913	0
			KEDSCQLnYSEGPCLGMQER	C5(Carbamidomethyl); Q6(Deamidated); N8(Deamidated); C14(Carbamidomethyl); M17(Oxidation)	2419.01	0	0.04666	High	2.62908					1
			KEDSCQLnYSEGPCLGMQER	C5(Carbamidomethyl); N8(Deamidated); C14(Carbamidomethyl)	2402.02	0	0.05088	High	2.5867					1
			EDSCQLnYSEGPCLGMQER	C4(Carbamidomethyl); N7(Deamidated); C13(Carbamidomethyl)	2273.92	0	0.0004525	High	2.89557					0
325	Q07797	Galectin-3-binding protein OS=Mus musculus GN=Lgals3bp PE=1 SV=1 - [LG3BP_MOUSE]	ALGYEnATQALGR	N6(Deamidated)	1364.68	0	1.016e-08	High	3.90853	High	3.89183	High	3.92594	0
			GLnLTEDTYKPR	N3(Deamidated)	1407.71	0	0.0002196	High	3.45231	High	3.51606	High	3.09888	0
			APIPTALDTnSSK	N10(Deamidated)	1315.68	0	0.001772	High	3.16942	High	3.06521	High	2.8687	0
			VVIRPFYLTnSTDMV	N10(Deamidated); M14(Oxidation)	1771.9	0	0.0001063	High	3.85662	High	3.91087			0
326	Q07968	Coagulation factor XIII B chain OS=Mus musculus GN=F13b PE=1 SV=2 - [F13B_MOUSE]	KEQETCLAPELEHGnYSTTQR	C6(Carbamidomethyl); N15(Deamidated)	2492.15	0	0.0006877	High	2.59419	High	3.27648	High	3.47488	1
			TYEnGSSVEYR	N4(Deamidated)	1305.56	0	0.05084	High	2.35737	High	2.21166			0
327	Q08481-2	Isoform 2 of Platelet endothelial cell adhesion molecule OS=Mus musculus GN=Pecam1 - [PECA1_MOUSE]	EETVLSQYQnFSK	N10(Deamidated)	1573.74	0	0.0008353	High	2.7335	High	2.79222	High	2.65926	0
			LDQGELLDLSCSVSGTPVAnFTIQK	C11(Carbamidomethyl); N20(Deamidated)	2693.35	0	3.333e-07	High	4.03796	High	5.16342	High	4.64859	0
			DDAMVYnVTSR	M4(Oxidation); N7(Deamidated)	1287.56	0	0.0004218	High	2.64571	High	2.63653			0
328	Q08857	Platelet glycoprotein 4 OS=Mus musculus GN=Cd36 PE=1 SV=2 - [CD36_MOUSE]	VISnnCTSYGVLDIGK	N5(Deamidated); C6(Carbamidomethyl)	1740.85	0	0.001071	High	4.47455	High	4.7249	High	4.0089	0
			VISnnCTSYGVLDIGK	N4(Deamidated); N5(Deamidated); C6(Carbamidomethyl)	1741.83	0	0.002349	High	4.49219	High	4.43047	High	4.23675	0
			RPYIVPILWLnETGTIGDEK	N11(Deamidated)	2315.24	0	5.275e-06					High	2.88408	0
329	Q09200	Beta-1,4 N-acetylgalactosaminyltransferase 1 OS=Mus musculus GN=B4galnt1 PE=2 SV=1 - [B4GN1_MOUSE]	IKEQVVGLLAQnnCSCESK	N13(Deamidated); C14(Carbamidomethyl); C16(Carbamidomethyl)	2178.06	0	0.000123	High	4.137	High	4.40192	High	5.27097	1
			EQVVGLLAQnnCSCESK	N11(Deamidated); C12(Carbamidomethyl); C14(Carbamidomethyl)	1936.88	0	0.004094	High	3.51099	High	3.30597			0
			LYPPSSLPQGAEYnISALVTIATK	N14(Deamidated)	2534.35	0	7.056e-05			High	3.12754	High	3.19183	0
330	Q19LI2	Alpha-1B-glycoprotein OS=Mus musculus GN=A1bg PE=1 SV=1 - [A1BG_MOUSE]	GTAGFLIYKPGnYSCSYLTHAAGEPSEPSDIVTIK	N12(Deamidated); C15(Carbamidomethyl)	3744.83	0	1.416e-07	High	3.08759	High	4.5783	High	4.6354	0
			LLFVGPQHAGnYSCR	N11(Deamidated); C14(Carbamidomethyl)	1719.83	0.001	0.009605					High	2.84149	0
331	Q2VLH6	Scavenger receptor cysteine-rich type 1 protein M130 OS=Mus musculus GN=Cd163 PE=2 SV=2 - [C163A_MOUSE]	QLGCADnGTVKPIPSDK	C4(Carbamidomethyl); N7(Deamidated)	1800.89	0	0.0001135	High	2.65831	High	3.64656	High	3.64538	0
332	Q3TCN2	Putative phospholipase B-like 2 OS=Mus musculus GN=Plbd2 PE=1 SV=2 - [PLBL2_MOUSE]	SDLnPAnGSYPFQALHQR	N7(Deamidated)	2015.96	0	8.969e-07	High	3.93253	High	4.02847	High	3.76331	0
333	Q3TDQ1	Dolichyl-diphosphooligosaccharide--protein glycosyltransferase subunit STT3B OS=Mus musculus GN=Stt3b PE=1 SV=2 - [STT3B_MOUSE]	TTLVDnnTWnnSHIALVGK	N10(Deamidated)	2098.06	0	0.04063	High	4.77104	High	5.33218	High	4.356	0
			AMSSnETAAYK	M2(Oxidation); N5(Deamidated)	1189.51	0	0.0008353			High	3.01478	High	2.02638	0
			AMSSnETAAYK	N5(Deamidated)	1173.52	0.001	0.1134	High	2.00698					0
334	Q3TJI8	Corticosteroid 11-beta-dehydrogenase isozyme 1 OS=Mus musculus GN=Hsd11b1 PE=2 SV=1 - [Q3TJI8_MOUSE]	QSnGSIAVISSLAGK	N3(Deamidated)	1432.77	0	3.348e-08	High	4.39358	High	4.47599	High	4.46455	0
			QSnGSIAVISSLAGK	Q1(Deamidated); N3(Deamidated)	1433.75	0	1.471e-09	High	3.99908			High	4.08577	0
335	Q3TKX1	ATPase, H+ transporting, lysosomal accessory protein OS=Mus musculus GN=Atp6ap1 PE=2 SV=1 - [Q3TKX1_MOUSE]	QLLQTQVASPAIHPPVSYnDTAPR	N19(Deamidated)	2604.35	0	1.491e-05	High	2.79476	High	2.48278	High	3.46315	0
			LnASLPALLLIR	N2(Deamidated)	1294.81	0	1.719e-05			High	3.57268	High	3.29885	0
336	Q3TWZ5	Thioredoxin domain-containing protein 11 OS=Mus musculus GN=Txndc11 PE=2 SV=1 - [Q3TWZ5_MOUSE]	EVMnFTAEnIYK	M3(Oxidation); N4(Deamidated)	1475.68	0.008	0.132			High	1.68292			0
337	Q3TYD4	Arylsulfatase G OS=Mus musculus GN=Arsg PE=2 SV=1 - [ARSG_MOUSE]	nGVTHnFAVTSVGGLPVnETTLAEVLR	N6(Deamidated); N18(Deamidated)	2797.46	0	0.04085	High	3.03456			High	2.50589	0
			ALADVLQDIADDnSSR	N13(Deamidated)	1703.82	0	0.0008994	High	4.19066			High	4.01886	0
338	Q3U3W2	Protein Tmem181a OS=Mus musculus GN=Tmem181a PE=2 SV=1 - [Q3U3W2_MOUSE]	VIETLPAnYSLnSSK	N8(Deamidated)	1636.85	0	0.000237	High	2.4439	High	2.79329	High	2.18185	0
339	Q3UDW8-2	Isoform 2 of Heparan-alpha-glucosaminide N-acetyltransferase OS=Mus musculus GN=Hgsnat - [HGNAT_MOUSE]	FGEFGnYSLLVQHASSGAnK	N6(Deamidated)	2127.02	0	8.366e-09	High	4.45683	High	4.54385	High	4.56396	0
340	Q3UEP4	MCG1788 OS=Mus musculus GN=Ugt2b36 PE=2 SV=1 - [Q3UEP4_MOUSE]	EMEDFVQSSGEHGVVVFSLGSMVSnMTEEK	M2(Oxidation); M22(Oxidation); N25(Deamidated); M26(Oxidation)	3338.47	0	0.0008353			High	2.33414	High	2.88171	0
341	Q3UHH8	Glucoside xylosyltransferase 1 OS=Mus musculus GN=Gxylt1 PE=2 SV=2 - [GXLT1_MOUSE]	nCSLEDDSVR	N1(Deamidated); C2(Carbamidomethyl)	1195.49	0	0.001232	High	2.24498	High	2.27162			0
342	Q3UMW8	Ceroid-lipofuscinosis neuronal protein 5 homolog OS=Mus musculus GN=Cln5 PE=2 SV=1 - [CLN5_MOUSE]	IFLYSGEPIYLGnETSIFGPK	N13(Deamidated)	2346.21	0	3.223e-06					High	3.58208	0
343	Q3UN00	P2X purinoceptor OS=Mus musculus GN=P2rx7 PE=2 SV=1 - [Q3UN00_MOUSE]	SAEnFTVLIK	N4(Deamidated)	1122.61	0.001	0.002671	High	2.19604	High	2.35854	High	2.31747	0
			GIAEVTEnVTEGGVTK	N8(Deamidated)	1604.81	0	0.0002566	High	4.08494	High	3.54866	High	2.78131	0
344	Q3UQ28	Peroxidasin homolog OS=Mus musculus GN=Pxdn PE=2 SV=2 - [PXDN_MOUSE]	ILCDnSDnITR	C3(Carbamidomethyl); N8(Deamidated)	1321.61	0	0.0006532	High	2.52655	High	2.67251	High	2.58625	0
345	Q3UUQ7	GPI inositol-deacylase OS=Mus musculus GN=Pgap1 PE=1 SV=3 - [PGAP1_MOUSE]	LHVAQPEnDSHVALLK	N8(Deamidated)	1771.94	0	0.001071	High	3.49714	High	3.22368	High	3.56823	0
			HInLTTLSVAGGFR	N3(Deamidated)	1486.81	0.001	0.005587					High	3.00397	0
346	Q3V3R4	Integrin alpha-1 OS=Mus musculus GN=Itga1 PE=1 SV=2 - [ITA1_MOUSE]	AnQIVIPHnTTFQTEPTK	N9(Deamidated)	2040.05	0	6.69e-08	High	4.21539	High	4.45561	High	3.7033	0
			VYVYAVnQTR	N7(Deamidated)	1213.63	0	0.0002723	High	3.17564	High	3.10799	High	2.92259	0
			GELQSEnSSLTLSSSnR	N7(Deamidated)	1809.85	0	5.389e-10	High	4.09673	High	4.21104	High	4.08678	0
			SQnDKFnVSLTVK	N7(Deamidated)	1480.77	0	2.283e-06	High	3.69196	High	4.51501	High	2.20358	1
			LDLPVnTSIPnVTEIK	N6(Deamidated)	1753.97	0	0.001762	High	4.21702	High	3.75474	High	3.64669	0
			YnHTGQVVIYK	N2(Deamidated)	1322.68	0	0.0002777	High	2.5277	High	3.15843	High	3.68299	0
			QTQVGIVQYGAnVTHEFnLnK	N12(Deamidated)	2361.19	0	0.001289	High	3.74747	High	3.26979	High	3.09576	0
			DSCESnQnITCR	C3(Carbamidomethyl); N8(Deamidated); C11(Carbamidomethyl)	1484.58	0	0.0007892	High	3.07259	High	3.00402	High	2.87537	0
			LDLPVnTSIPnVTEIK	N6(Deamidated); N11(Deamidated)	1754.95	0	2.757e-10			High	4.2395	High	4.64605	0
			VTLDFnLTDPEnGPVLDDALPnSVHGHIPFAK	N6(Deamidated)	3443.71	0	3.219e-06			High	4.34105	High	4.03083	0
			LDLPVnTSIPnVTEIKEnMTFGSTLVTnPK	N18(Deamidated); M19(Oxidation); N28(Deamidated)	3290.69	0	0.0004849			High	3.65414	High	3.70594	1
			ETVCInATMCFHVK	C4(Carbamidomethyl); N6(Deamidated); M9(Oxidation); C10(Carbamidomethyl)	1726.77	0.001	0.02216			High	2.18666			0
			DSCESnQnITCR	C3(Carbamidomethyl); Q7(Deamidated); N8(Deamidated); C11(Carbamidomethyl)	1485.57	0.001	0.002904			High	2.65761			0
			EnMTFGSTLVTnPK	N2(Deamidated); M3(Oxidation)	1555.73	0	0.0003418	High	3.15267					0
347	Q4PZA2-3	Isoform C of Endothelin-converting enzyme 1 OS=Mus musculus GN=Ece1 - [ECE1_MOUSE]	QVSTLInnTDK	N7(Deamidated)	1233.63	0	0.0008441	High	2.43798	High	2.17461	High	2.55359	0
			DYYLnKTEnEK	N5(Deamidated)	1417.65	0	0.001764	High	2.55402	High	2.91212	High	2.67718	1
			HLLEnATASVSEAER	N5(Deamidated)	1627.8	0	1.359e-14	High	4.59207	High	4.41404	High	4.87568	0
			LLGGGDEDAIRPQMQQILDFETALAnITIPQEK	M14(Oxidation); N26(Deamidated)	3641.86	0	3.465e-07	High	3.49181	High	4.67496	High	4.06796	0
			nSSVEAFK	N1(Deamidated)	882.421	0.001	0.005908			High	1.83054	High	1.7533	0
			HLLEnATASVSEAERK	N5(Deamidated)	1755.89	0	3.256e-07			High	4.80554			1
348	Q542I8	Integrin beta OS=Mus musculus GN=Itgb2 PE=2 SV=1 - [Q542I8_MOUSE]	LnFTGPGEPDSLR	N2(Deamidated)	1403.69	0	0.0008353	High	2.7919	High	2.76717	High	2.66491	0
			DnHTSCAECLK	N2(Deamidated); C6(Carbamidomethyl); C9(Carbamidomethyl)	1335.54	0	0.001265	High	2.95577	High	3.21106			0
			KDnSSIVCSGLGDCICGQCVCHTSDVPnK	N3(Deamidated); C8(Carbamidomethyl); C14(Carbamidomethyl); C16(Carbamidomethyl); C19(Carbamidomethyl); C21(Carbamidomethyl)	3268.39	0	1.949e-05			High	4.24943			1
349	Q571E4	N-acetylgalactosamine-6-sulfatase OS=Mus musculus GN=Galns PE=2 SV=2 - [GALNS_MOUSE]	TGEAnLTQLYTQEALDFIQTQHAR	N5(Deamidated)	2749.35	0	3.761e-08	High	4.91385	High	5.33029	High	4.987	0
			TGEAnLTQLYTQEALDFIQTQHAR	N5(Deamidated); Q8(Deamidated)	2750.35	0	1.674e-06			High	4.37209			0
350	Q5FWI3	Transmembrane protein 2 OS=Mus musculus GN=Tmem2 PE=1 SV=1 - [TMEM2_MOUSE]	FDTHEYHnESR	N8(Deamidated)	1435.59	0	0.0006899	High	2.29657	High	2.06061	High	2.07977	0
			GDPSIISVnGTDFTFR	N9(Deamidated)	1726.84	0	0.0001747	High	4.2225	High	4.15886	High	4.1608	0
			VLEnEKFDTHEYHnESR	N14(Deamidated)	2147.97	0	1.082e-07	High	2.23032			High	2.13924	1
351	Q5PT54	Sodium/bile acid cotransporter 5 OS=Mus musculus GN=Slc10a5 PE=2 SV=1 - [NTCP5_MOUSE]	VLQVVnVTK	N6(Deamidated)	1000.61	0	0.0001661	High	2.35373	High	2.91319	High	2.36642	0
352	Q5SVW9	Transmembrane emp24 domain-containing protein 4 (Fragment) OS=Mus musculus GN=Tmed4 PE=3 SV=1 - [Q5SVW9_MOUSE]	FTFTSHTPGDHQICLHSnSTR	C14(Carbamidomethyl); N18(Deamidated)	2444.11	0	8.497e-11	High	3.99771	High	3.38208	High	4.95736	0
353	Q5U462	CUB domain-containing protein 1 OS=Mus musculus GN=Cdcp1 PE=2 SV=1 - [CDCP1_MOUSE]	IGTFCSnGTVSR	C5(Carbamidomethyl); N7(Deamidated)	1299.6	0	0.002014	High	2.21666	High	2.29091	High	2.09417	0
354	Q5XF89	Probable cation-transporting ATPase 13A3 OS=Mus musculus GN=Atp13a3 PE=1 SV=1 - [AT133_MOUSE]	VCDPnSDVCnTTR	C2(Carbamidomethyl); C9(Carbamidomethyl); N10(Deamidated)	1538.63	0	0.003161	High	3.27978	High	2.99555	High	2.20516	0
			VCDPnSDVCnTTR	C2(Carbamidomethyl); N5(Deamidated); C9(Carbamidomethyl); N10(Deamidated)	1539.6	0.001	0.001881					High	2.96553	0
355	Q60590	Alpha-1-acid glycoprotein 1 OS=Mus musculus GN=Orm1 PE=1 SV=1 - [A1AG1_MOUSE]	ESQTIGDQCVYnSTHLGFQR	C9(Carbamidomethyl); N12(Deamidated)	2341.06	0	0.0001422	High	4.92105	High	3.80097	High	4.15486	0
356	Q60738	Zinc transporter 1 OS=Mus musculus GN=Slc30a1 PE=1 SV=1 - [ZNT1_MOUSE]	SSVEIInSTQAPMR	N7(Deamidated); M13(Oxidation)	1549.76	0	0.001071	High	2.05037	High	2.34688	High	2.79186	0
357	Q60805	Tyrosine-protein kinase Mer OS=Mus musculus GN=Mertk PE=1 SV=1 - [MERTK_MOUSE]	SDnGSYFCK	N3(Deamidated); C8(Carbamidomethyl)	1078.41	0	0.004021	High	2.4145	High	1.77309	High	2.38261	0
			QPESVnVTR	N6(Deamidated)	1030.52	0.003	0.1461	High	1.44544					0
358	Q61029-3	Isoform Epsilon of Lamina-associated polypeptide 2, isoforms beta/delta/epsilon/gamma OS=Mus musculus GN=Tmpo - [LAP2B_MOUSE]	ASSnESLVAnR	N4(Deamidated)	1148.55	0.006	0.1103			High	1.88145			0
359	Q61129	Complement factor I OS=Mus musculus GN=Cfi PE=1 SV=3 - [CFAI_MOUSE]	FSHnGTCAAEGK	N4(Deamidated); C7(Carbamidomethyl)	1279.55	0	0.00138	High	3.15565	High	3.26115	High	2.88789	0
			FnVSLIYGR	N2(Deamidated)	1069.57	0	0.0006559	High	3.09602	High	3.21873	High	3.08683	0
360	Q61176	Arginase-1 OS=Mus musculus GN=Arg1 PE=1 SV=1 - [ARGI1_MOUSE]	DHGDLAFVDVPnDSSFQIVK	N12(Deamidated)	2204.06	0	5.409e-10					High	4.46684	0
361	Q61391	Neprilysin OS=Mus musculus GN=Mme PE=1 SV=3 - [NEP_MOUSE]	EIAnATTKPEDR	N4(Deamidated)	1345.66	0	2.304e-05	High	2.47509	High	2.59365	High	3.32548	0
			SCInESAIDSR	C2(Carbamidomethyl); N4(Deamidated)	1252.55	0	9.516e-06	High	3.03321	High	3.35702	High	3.12225	0
			LQnnFSLEVnGK	N4(Deamidated); N10(Deamidated)	1364.67	0	0.03569	High	2.499	High	2.35038			0
362	Q61469	Lipid phosphate phosphohydrolase 1 OS=Mus musculus GN=Ppap2a PE=1 SV=1 - [LPP1_MOUSE]	InCSDGYIEDYICQGnEEK	N2(Deamidated); C3(Carbamidomethyl); C13(Carbamidomethyl)	2307.95	0	6.432e-05	High	5.60825	High	5.25518	High	5.40871	0
363	Q61495	Desmoglein-1-alpha OS=Mus musculus GN=Dsg1a PE=2 SV=2 - [DSG1A_MOUSE]	TGEInITSIVDR	N5(Deamidated)	1318.69	0	4.285e-06	High	3.46953	High	3.56318			0
364	Q61503	5'-nucleotidase OS=Mus musculus GN=Nt5e PE=1 SV=2 - [5NTD_MOUSE]	IKLDnYSTQELGR	N5(Deamidated)	1537.79	0	3.356e-06	High	2.48598	High	3.97124	High	3.94191	1
			LDnYSTQELGR	N3(Deamidated)	1296.61	0	0.000746			High	2.70021	High	3.31914	0
			VEFDDKGnVITSYGnPILLnSSIPEDATIK	N20(Deamidated)	3250.65	0	0.002525	High	4.19626			High	2.76948	1
			CLnASLCVGGVAR	C1(Carbamidomethyl); N3(Deamidated); C7(Carbamidomethyl)	1377.66	0	0.0002735	High	4.52144			High	3.64333	0
365	Q61508-2	Isoform Short of Extracellular matrix protein 1 OS=Mus musculus GN=Ecm1 - [ECM1_MOUSE]	nVALVAGDTGnATGLGEQGPTR	N11(Deamidated)	2099.04	0	2.72738e-23	High	4.9266	High	5.88701	High	6.1143	0
366	Q61526	Receptor tyrosine-protein kinase erbB-3 OS=Mus musculus GN=Erbb3 PE=1 SV=2 - [ERBB3_MOUSE]	nLnVTSLGFR	N3(Deamidated)	1121.6	0	0.01647	High	2.98915	High	2.99374	High	2.9445	0
			YQTVDSSnIDGFVnCTK	N14(Deamidated); C15(Carbamidomethyl)	1948.87	0	6.444e-12	High	3.39864	High	4.65829	High	4.89789	0
			HFnDSGACVPR	N3(Deamidated); C8(Carbamidomethyl)	1260.54	0	0.001071	High	2.57563	High	2.57397	High	2.9586	0
367	Q61549	EGF-like module-containing mucin-like hormone receptor-like 1 OS=Mus musculus GN=Emr1 PE=2 SV=1 - [EMR1_MOUSE]	VInEECKEnESInLAAR	C6(Carbamidomethyl); N9(Deamidated)	1989.96	0	0.004966	High	3.66863	High	3.11991	High	3.64424	1
368	Q61606	Glucagon receptor OS=Mus musculus GN=Gcgr PE=2 SV=2 - [GLR_MOUSE]	nASQCQLDDEEIEVQK	N1(Deamidated); C5(Carbamidomethyl)	1906.84	0	3.043e-10	High	4.31216	High	5.56822	High	4.86155	0
			LYSDQCHHnLSLLPPPTELVCnR	C6(Carbamidomethyl); N9(Deamidated); C21(Carbamidomethyl); N22(Deamidated)	2765.31	0	4.601e-05	High	2.47619	High	3.3429	High	2.71695	0
369	Q61646	Haptoglobin OS=Mus musculus GN=Hp PE=1 SV=1 - [HPT_MOUSE]	VVLHPnHSVVDIGLIK	N6(Deamidated)	1741.01	0	3.031e-10	High	4.09562	High	4.55985	High	4.94384	0
			nLFLnHSETASAK	N5(Deamidated)	1432.71	0	0.002091	High	3.62327	High	3.40546	High	3.54253	0
			KnLTSPVGVQPILnEHTFCAGLTK	N2(Deamidated); C19(Carbamidomethyl)	2625.38	0	2.444e-10	High	4.19689	High	5.44025	High	5.15319	1
			nLFLnHSETASAK	N1(Deamidated); N5(Deamidated)	1433.69	0	0.002054	High	3.26169	High	2.58982	High	2.56748	0
			nLTSPVGVQPILnEHTFCAGLTK	N1(Deamidated); N13(Deamidated); C18(Carbamidomethyl)	2498.27	0	0.000635	High	2.87203	High	3.03649	High	3.04713	0
			nLTSPVGVQPILnEHTFCAGLTK	N1(Deamidated); C18(Carbamidomethyl)	2497.28	0	3.328e-08	High	3.79448	High	3.74592	High	4.10997	0
			CVVHYEnSTVPEKK	C1(Carbamidomethyl); N7(Deamidated)	1690.81	0	8.893e-05	High	3.69517	High	3.76563	High	3.89665	1
			CVVHYEnSTVPEK	C1(Carbamidomethyl); N7(Deamidated)	1562.72	0	0.0002146	High	3.37543	High	3.54361	High	4.03116	0
370	Q61702	Inter-alpha-trypsin inhibitor heavy chain H1 OS=Mus musculus GN=Itih1 PE=1 SV=2 - [ITIH1_MOUSE]	AnLSSQVLK	N2(Deamidated)	960.538	0	0.004224	High	2.44836	High	2.41421	High	2.48502	0
			TEGEERAnLSSQVLK	N8(Deamidated)	1661.84	0.005	0.09186			High	2.763			1
371	Q61735	Leukocyte surface antigen CD47 OS=Mus musculus GN=Cd47 PE=1 SV=2 - [CD47_MOUSE]	SYIFIYDGnKnSTTTDQnFTSAK	N11(Deamidated); N18(Deamidated)	2617.2	0	8.723e-09	High	4.19489	High	4.84512	High	3.95201	1
			nSTTTDQnFTSAK	N1(Deamidated); N8(Deamidated)	1416.61	0	4.405e-07	High	3.30709	High	3.12085	High	3.43437	0
			DAMVGnYTCEVTELSR	M3(Oxidation); N6(Deamidated); C9(Carbamidomethyl)	1861.8	0	1.043e-08	High	4.94605	High	5.06397	High	4.88642	0
372	Q61739-2	Isoform Alpha-6X1A of Integrin alpha-6 OS=Mus musculus GN=Itga6 - [ITA6_MOUSE]	YQTLnCSVnVR	N5(Deamidated); C6(Carbamidomethyl)	1354.65	0.001	0.02036			High	2.33042	High	1.88115	0
373	Q61830	Macrophage mannose receptor 1 OS=Mus musculus GN=Mrc1 PE=1 SV=2 - [MRC1_MOUSE]	TSYCnESFYFLCK	C4(Carbamidomethyl); N5(Deamidated); C12(Carbamidomethyl)	1719.71	0	1.39e-05	High	3.8614	High	3.95398	High	4.21829	0
			WECKnDTLFGIK	C3(Carbamidomethyl); N5(Deamidated)	1511.73	0	0.0008353	High	3.43655	High	3.20563	High	3.0271	1
			HGFYCYLIGSTLSTFTDAnHTCTnEK	C5(Carbamidomethyl); N19(Deamidated); C22(Carbamidomethyl)	3038.34	0	1.167e-14					High	5.62761	0
374	Q61838	Alpha-2-macroglobulin OS=Mus musculus GN=A2m PE=1 SV=3 - [A2M_MOUSE]	SLGEVnFTATAEALQSPELCGnK	N6(Deamidated); C20(Carbamidomethyl)	2437.17	0	5.993e-08	High	5.39402	High	5.92742	High	5.76176	0
			InVSYTGERPSSnMVIVDVK	N2(Deamidated); M14(Oxidation)	2225.11	0	0.001465	High	4.3666	High	3.53545	High	3.56301	0
			VnLSFPSAQSLPASDTHLK	N2(Deamidated)	2013.03	0	2.945e-09	High	3.88697	High	4.92328	High	4.49381	0
			InVSYTGERPSSnMVIVDVK	N2(Deamidated)	2209.12	0	2.358e-07	High	3.83016	High	4.42301			0
			VVSVDISFRPLnETFPVVYIETPK	N12(Deamidated)	2750.49	0	0.0008353					High	3.08578	0
375	Q62028	Secretory phospholipase A2 receptor OS=Mus musculus GN=Pla2r1 PE=1 SV=1 - [PLA2R_MOUSE]	DLnHTAQGILEK	N3(Deamidated)	1339.69	0	0.0094	High	3.60158	High	3.59944	High	2.88274	0
			MQDTLEHHVnVSDTSAIPSTLEYGnR	M1(Oxidation); N10(Deamidated); N25(Deamidated)	2932.34	0	0.003513	High	3.27887	High	2.56685	High	2.88793	0
376	Q62086	Serum paraoxonase/arylesterase 2 OS=Mus musculus GN=Pon2 PE=1 SV=2 - [PON2_MOUSE]	IQnILSEKPSVTTVYInnGSVLQGSSVATIYDRK	N17(Deamidated)	3695.97	0	8.478e-05	High	2.85657	High	4.84377	High	6.01421	1
			IQnILSEKPSVTTVYInnGSVLQGSSVATIYDR	N17(Deamidated); N18(Deamidated)	3568.87	0	0.007121	High	3.62251					0
			QPnMnLTQLK	M4(Oxidation); N5(Deamidated)	1203.61	0.008	0.2208	High	1.95745					0
377	Q62087	Serum paraoxonase/lactonase 3 OS=Mus musculus GN=Pon3 PE=1 SV=2 - [PON3_MOUSE]	VSTLYAnnGSVLQGSTVASVYHK	N8(Deamidated); Q13(Deamidated)	2397.2	0	2.556e-07	High	3.65909	High	4.62404	High	4.85137	0
			VSTLYAnnGSVLQGSTVASVYHK	N8(Deamidated)	2396.21	0	0.001261	High	4.70302	High	4.70703	High	5.16048	0
378	Q62165	Dystroglycan OS=Mus musculus GN=Dag1 PE=1 SV=4 - [DAG1_MOUSE]	nCSSITLQnITR	N1(Deamidated); C2(Carbamidomethyl); N9(Deamidated)	1408.68	0	0.01852	High	2.85923					0
379	Q62178	Semaphorin-4A OS=Mus musculus GN=Sema4a PE=1 SV=2 - [SEM4A_MOUSE]	SnETQCFnFIR	N2(Deamidated); C6(Carbamidomethyl)	1416.62	0	0.0008353	High	2.92519	High	3.0101	High	3.39722	0
			AnCSVYESCVDCVLAR	N2(Deamidated); C3(Carbamidomethyl); C9(Carbamidomethyl); C12(Carbamidomethyl)	1903.81	0	0.007387	High	3.6333					0
380	Q62192	CD180 antigen OS=Mus musculus GN=Cd180 PE=1 SV=2 - [CD180_MOUSE]	nLSHLQSLnLSYnEPLSLK	N1(Deamidated); N9(Deamidated)	2172.13	0	0.06379	High	3.22756	High	3.76775			0
381	Q62230-3	Isoform 3 of Sialoadhesin OS=Mus musculus GN=Siglec1 - [SN_MOUSE]	nFnCSTPYLCLQEK	N3(Deamidated); C4(Carbamidomethyl); C10(Carbamidomethyl)	1774.78	0	4.669e-09	High	2.78392	High	3.60995	High	4.04497	0
			AnTSLELLLEGVR	N2(Deamidated)	1415.78	0	2.396e-06	High	3.39428	High	3.62834	High	3.76867	0
			MnPAGPVLEnETVTLLCSTPK	M1(Oxidation); N10(Deamidated); C17(Carbamidomethyl)	2288.13	0.004	0.08627			High	2.7569			0
382	Q62313	Trans-Golgi network integral membrane protein 1 OS=Mus musculus GN=Tgoln1 PE=1 SV=1 - [TGON1_MOUSE]	TDAELnETARPLSPVnPK	N6(Deamidated)	1953	0	4.624e-06	High	3.35004	High	4.22955	High	4.3359	0
383	Q62351	Transferrin receptor protein 1 OS=Mus musculus GN=Tfrc PE=1 SV=1 - [TFR1_MOUSE]	nITAFnETLFR	N6(Deamidated)	1326.67	0.004	0.162	High	2.64385					0
384	Q63880	Carboxylesterase 3A OS=Mus musculus GN=Ces3a PE=1 SV=2 - [EST3A_MOUSE]	nVnISYTVnDSFFPQRPQK	N3(Deamidated); N9(Deamidated)	2256.1	0	3.158e-08	High	4.13562	High	5.30969	High	4.42024	0
			KnVnISYTVnDSFFPQRPQK	N4(Deamidated); N10(Deamidated)	2384.2	0	3.067e-08	High	3.73398	High	4.85879	High	4.26557	1
			nVnISYTVnDSFFPQRPQK	N1(Deamidated); N3(Deamidated); N9(Deamidated)	2257.09	0	0.005077	High	4.05392					0
385	Q63886	UDP-glucuronosyltransferase 1-1 OS=Mus musculus GN=Ugt1a1 PE=2 SV=2 - [UD11_MOUSE]	EnVTATLVELGR	N2(Deamidated)	1302.69	0	1.237e-05	High	4.07828	High	4.06672	High	4.1689	0
			KFPVPFQKEnVTATLVELGR	N10(Deamidated)	2274.25	0	6.077e-10			High	3.12488	High	4.92376	2
386	Q64487-3	Isoform B of Receptor-type tyrosine-protein phosphatase delta OS=Mus musculus GN=Ptprd - [PTPRD_MOUSE]	KVEVEAVnATAVK	N8(Deamidated)	1358.76	0	3.879e-10	High	4.33474	High	4.36727	High	4.6199	1
387	Q64726	Zinc-alpha-2-glycoprotein OS=Mus musculus GN=Azgp1 PE=1 SV=2 - [ZA2G_MOUSE]	DTTGSHTFQGMFGCEITnnR(S)	M11(Oxidation); C14(Carbamidomethyl); N18(Deamidated)	2289.96	0	1.69e-07	High	3.76059	High	3.36814	High	3.58247	0
			DTTGSHTFQGMFGCEITnnR(S)	C14(Carbamidomethyl); N18(Deamidated)	2273.97	0	0.01534	High	2.5226					0
388	Q69ZN6-2	Isoform 2 of N-acetylglucosamine-1-phosphotransferase subunits alpha/beta OS=Mus musculus GN=Gnptab - [GNPTA_MOUSE]	TnVSHVVGQLDDIRK	N2(Deamidated)	1681.89	0.001	0.003922			High	3.06121			1
389	Q6AXE3	ATP-binding cassette sub-family A member 3 OS=Mus musculus GN=Abca3 PE=2 SV=1 - [Q6AXE3_MOUSE]	YHAnTSAQQLFQK	N4(Deamidated)	1536.75	0	0.001071	High	2.74081	High	3.15439	High	3.66011	0
390	Q6DYE8	Ectonucleotide pyrophosphatase/phosphodiesterase family member 3 OS=Mus musculus GN=Enpp3 PE=1 SV=2 - [ENPP3_MOUSE]	LnLSEGEVAATVK	N2(Deamidated)	1331.71	0	1.653e-08	High	3.15741	High	3.84049	High	4.05237	0
			nYSnSVPYER	N1(Deamidated)	1229.55	0	0.06324	High	2.67519	High	2.46895	High	2.23328	0
			nFSLSSVEK	N1(Deamidated)	1011.5	0.002	0.02996	High	1.77328	High	2.19953			0
391	Q6GQT6	Sterol regulatory element-binding protein cleavage-activating protein OS=Mus musculus GN=Scap PE=1 SV=1 - [SCAP_MOUSE]	LPEnQTLPGELPEHAGPAEGVHDSR	N4(Deamidated)	2651.28	0	0.005012	High	3.59034	High	3.44364	High	2.80633	0
392	Q6GQT9	Nodal modulator 1 OS=Mus musculus GN=Nomo1 PE=1 SV=1 - [NOMO1_MOUSE]	VTnSnAnAAGPLIVAGYnVSGSVR	N7(Deamidated); N18(Deamidated)	2333.19	0	0.0001455	High	5.27846	High	3.50626	High	4.02633	0
			VTnSnAnAAGPLIVAGYnVSGSVR	N18(Deamidated)	2332.2	0	2.674e-11	High	5.50262	High	5.52803	High	5.53295	0
393	Q6IFZ6	Keratin, type II cytoskeletal 1b OS=Mus musculus GN=Krt77 PE=1 SV=1 - [K2C1B_MOUSE]	WELLQQVnTSTR	N8(Deamidated)	1475.76	0	7.226e-05	High	3.13853	High	3.05832	High	3.04542	0
394	Q6P5E4	UDP-glucose:glycoprotein glucosyltransferase 1 OS=Mus musculus GN=Uggt1 PE=1 SV=4 - [UGGG1_MOUSE]	GTEVnATVIGESDPIDEVQGFLFGK	N5(Deamidated)	2623.29	0	2.125e-14	High	5.28077	High	5.09227	High	5.30903	0
395	Q6P6I8	Signal-regulatory protein alpha OS=Mus musculus GN=Sirpa PE=2 SV=1 - [Q6P6I8_MOUSE]	GIAnLSnFIR	N4(Deamidated)	1105.6	0	0.0008353	High	2.67151	High	2.86417	High	3.04444	0
			ISnVTPADAGIYYCVK	N3(Deamidated); C14(Carbamidomethyl)	1771.86	0	0.003211	High	3.7087	High	3.29076	High	3.03617	0
			VTQQSPTSMnQVnLTCR	M9(Oxidation); N13(Deamidated); C16(Carbamidomethyl)	1980.92	0	3.482e-09	High	3.91721	High	3.46639	High	4.27787	0
			nVSYnISSTVR	N1(Deamidated); N5(Deamidated)	1241.6	0	0.04495	High	2.55317	High	2.08879			0
			DGQELHPLETTVnPSGKnVSYnISSTVR	N18(Deamidated); N22(Deamidated)	3044.5	0	0.01139	High	3.51671	High	3.01876	High	2.32896	1
			VTQQSPTSMnQVnLTCR	N13(Deamidated); C16(Carbamidomethyl)	1964.92	0	0.002158	High	3.57317					0
396	Q6P6J9	Thioredoxin domain-containing protein 15 OS=Mus musculus GN=Txndc15 PE=1 SV=1 - [TXD15_MOUSE]	IFIFnQTGIEAK	N5(Deamidated)	1381.74	0	4.072e-06	High	3.69511	High	4.17463	High	3.92228	0
			nVTGLEnFTLK	N1(Deamidated); N7(Deamidated)	1237.64	0	0.0217	High	2.94192	High	2.83851	High	2.64349	0
			VnCEERnVTGLEnFTLK	C3(Carbamidomethyl); N7(Deamidated); N13(Deamidated)	2024.97	0	7.733e-05	High	3.54962	High	3.95806	High	3.62992	1
			EEEYYAEPGVTEAEPVATEDAnSTDSLK	N22(Deamidated)	3045.33	0	0.00372	High	3.54644	High	2.72953			0
			EnLFGLQGAGGFQDREEEYYAEPGVTEAEPVATEDAnSTDSLK	N37(Deamidated)	4635.11	0	0.000641			High	3.27693			1
			EnLFGLQGAGGFQDREEEYYAEPGVTEAEPVATEDAnSTDSLK	N2(Deamidated); N37(Deamidated)	4636.1	0	0.0003495			High	3.58339			1
397	Q6P9J9-2	Isoform 2 of Anoctamin-6 OS=Mus musculus GN=Ano6 - [ANO6_MOUSE]	nTDKEnPYIGLGnYTLCR	N13(Deamidated); C17(Carbamidomethyl)	2129	0.001	0.004407	High	2.37492			High	3.04319	1
398	Q6PAR0-3	Isoform 3 of Kelch domain-containing protein 10 OS=Mus musculus GN=Klhdc10 - [KLD10_MOUSE]	LDLnTMVWTQLKPnnLSCDLPEER	M6(Oxidation); Q10(Deamidated); N15(Deamidated); C18(Carbamidomethyl)	2904.39	0.007	0.2088	High	2.31383					0
399	Q6PD26	GPI transamidase component PIG-S OS=Mus musculus GN=Pigs PE=1 SV=3 - [PIGS_MOUSE]	IYnASELPVR	N3(Deamidated)	1162.61	0	0.0003456	High	2.73979	High	3.18793	High	3.13555	0
400	Q6PE70	Integrin beta OS=Mus musculus GN=Itgb5 PE=2 SV=1 - [Q6PE70_MOUSE]	CSGnGTYTCGLCECDPGYLGTR	C1(Carbamidomethyl); N4(Deamidated); C9(Carbamidomethyl); C12(Carbamidomethyl); C14(Carbamidomethyl)	2498.98	0	2.72e-07	High	3.35705	High	4.0351	High	2.68195	0
			CHAGYIGDnCnCSTDVSTCR	C1(Carbamidomethyl); C10(Carbamidomethyl); N11(Deamidated); C12(Carbamidomethyl); C19(Carbamidomethyl)	2347.89	0	0.008372	High	2.86237	High	2.45851			0
401	Q6PHU5	Sortilin OS=Mus musculus GN=Sort1 PE=1 SV=1 - [SORT_MOUSE]	DITnLInnTFIR	N7(Deamidated)	1434.77	0	0.0001131			High	3.46905			0
402	Q71KU9	Fibrinogen-like protein 1 OS=Mus musculus GN=Fgl1 PE=2 SV=2 - [FGL1_MOUSE]	IDLTDFEKnSSFAQYQSFK	N9(Deamidated)	2269.08	0	2.381e-08	High	4.94504	High	5.07222	High	5.03353	1
			nSSFAQYQSFK	N1(Deamidated)	1307.59	0	3.435e-05	High	2.81673	High	3.46845	High	3.09718	0
403	Q7TMR0	Lysosomal Pro-X carboxypeptidase OS=Mus musculus GN=Prcp PE=2 SV=2 - [PCP_MOUSE]	nISSHSnIIFSnGELDPWSGGGVTR	N1(Deamidated)	2645.27	0	8.869e-08	High	3.92175			High	3.89977	0
404	Q80V26	Inositol monophosphatase 3 OS=Mus musculus GN=Impad1 PE=1 SV=1 - [IMPA3_MOUSE]	QVALQTFGnQTSIIPAGGAGYK	N9(Deamidated)	2222.16	0	8.088e-05	High	4.26331	High	5.65927	High	4.58025	0
405	Q80X19-2	Isoform 2 of Collagen alpha-1(XIV) chain OS=Mus musculus GN=Col14a1 - [COEA1_MOUSE]	VVDKGnGSKPTSPEEVK	N6(Deamidated)	1771.91	0	7.722e-05	High	2.6131	High	2.63292	High	2.70609	1
			AInASAnITSDGVEVLGR	N3(Deamidated); N7(Deamidated)	1788.91	0	6.435e-10	High	3.78384	High	4.09905	High	4.39121	0
			GnGSKPTSPEEVK	N2(Deamidated)	1330.65	0.004	0.06452					High	2.41657	0
406	Q80X71	Transmembrane protein 106B OS=Mus musculus GN=Tmem106b PE=1 SV=1 - [T106B_MOUSE]	LnnITnIGPLDMK	N3(Deamidated); M12(Oxidation)	1459.75	0	1.022e-08	High	4.24791	High	4.22371	High	4.54399	0
			LnnITnIGPLDMK	N3(Deamidated)	1443.76	0	0.01501	High	3.13449					0
407	Q80YQ1	Thrombospondin 1 OS=Mus musculus GN=Thbs1 PE=2 SV=1 - [Q80YQ1_MOUSE]	GCSSSATnVLLTLDnnVVnGSSPAIR	C2(Carbamidomethyl); N19(Deamidated)	2647.31	0	2.448e-06	High	3.49376	High	3.85384	High	4.22101	0
408	Q80YS4	Receptor protein-tyrosine kinase OS=Mus musculus GN=Tek PE=2 SV=1 - [Q80YS4_MOUSE]	VPGnLTSVLLSnLVPR	N4(Deamidated)	1679.98	0	2.541e-08			High	4.7576			0
409	Q80YX0	Tenascin OS=Mus musculus GN=Tnc PE=4 SV=1 - [Q80YX0_MOUSE]	GPnCSEPDCPGnCnLR	N3(Deamidated); C4(Carbamidomethyl); C9(Carbamidomethyl); C13(Carbamidomethyl)	1847.71	0.001	0.02526	High	1.0072	High	2.39743			0
410	Q80YX8	Major urinary protein 26 OS=Mus musculus GN=Mup21 PE=2 SV=1 - [Q80YX8_MOUSE]	AFVEnITVLEnSLVFK	N5(Deamidated)	1823.99	0	3.308e-09			High	5.50183	High	5.03409	0
411	Q8BFR4	N-acetylglucosamine-6-sulfatase OS=Mus musculus GN=Gns PE=2 SV=1 - [GNS_MOUSE]	YYnYTLSInGK	N3(Deamidated); N9(Deamidated)	1337.63	0	3.115e-05	High	3.49991	High	3.38622	High	3.58793	0
			YPHnHHVVnnTLEGnCSSK	N10(Deamidated); N15(Deamidated); C16(Carbamidomethyl)	2208.98	0	6.381e-07	High	3.02049	High	3.97604	High	4.62872	0
			TPMTnSSIR	M3(Oxidation); N5(Deamidated)	1023.48	0	0.002418			High	2.30265	High	1.63585	0
			MLVSnIDLGPTILDLAGYDLnK(T)	M1(Oxidation); N21(Deamidated)	2392.25	0	4.84e-18			High	5.39245	High	6.06486	0
			TPMTnSSIR	N5(Deamidated)	1007.48	0.006	0.1736	High	1.75307					0
412	Q8BG07-2	Isoform 2 of Phospholipase D4 OS=Mus musculus GN=Pld4 - [PLD4_MOUSE]	ELGAIIYnCSnLAQDLEK	N8(Deamidated); C9(Carbamidomethyl)	2052	0	4.833e-13	High	4.82842	High	4.84487	High	5.36295	0
			VFIVPVGnHSnIPFSR	N8(Deamidated)	1783.96	0	2.877e-06	High	2.78116	High	3.26392	High	3.43006	0
			nISVVVATHSPTLAK	N1(Deamidated)	1537.86	0	2.214e-06	High	3.59953	High	4.02918	High	3.80859	0
			nFSSHInR	N1(Deamidated)	975.465	0.002	0.01228	High	2.1702			High	2.67109	0
413	Q8BGQ4-2	Isoform 2 of Protein O-mannosyl-transferase 2 OS=Mus musculus GN=Pomt2 - [POMT2_MOUSE]	FSGAnDTDFR	N5(Deamidated)	1130.48	0	0.0004578	High	2.38601	High	2.34686	High	1.89693	0
			MGSYYInR(T)	M1(Oxidation); N7(Deamidated)	1020.45	0.001	0.02472			High	1.81054	High	2.00528	0
			LSGnSLHnASIPEHLAYGSVITVK	N8(Deamidated)	2508.32	0	4.93e-06					High	3.96444	0
414	Q8BGT0	Osteopetrosis-associated transmembrane protein 1 OS=Mus musculus GN=Ostm1 PE=1 SV=1 - [OSTM1_MOUSE]	nIGnTSEGPR	N4(Deamidated)	1045.49	0	0.0008353	High	2.16948	High	1.95291	High	1.81645	0
415	Q8BH24	Transmembrane 9 superfamily member 4 OS=Mus musculus GN=Tm9sf4 PE=2 SV=1 - [TM9S4_MOUSE]	KCEVLCnQSnKPITLTVEQSR	C2(Carbamidomethyl); C6(Carbamidomethyl); N7(Deamidated)	2505.25	0	0.001071	High	3.49808	High	3.36316	High	3.55592	1
416	Q8BHC0	Lymphatic vessel endothelial hyaluronic acid receptor 1 OS=Mus musculus GN=Lyve1 PE=1 SV=1 - [LYVE1_MOUSE]	nKnPQMnFTEAnEACK	M6(Oxidation); N7(Deamidated); C15(Carbamidomethyl)	1912.82	0	0.0001103	High	1.77521	High	3.11387	High	3.76564	1
			nPQMnFTEAnEACK	M4(Oxidation); N5(Deamidated); C13(Carbamidomethyl)	1670.68	0	0.0007832	High	2.06783	High	2.66137			0
			nKnPQMnFTEAnEACK	N7(Deamidated); C15(Carbamidomethyl)	1896.83	0	0.008095	High	3.13984					1
417	Q8BHG3	Cell cycle control protein 50B OS=Mus musculus GN=Tmem30b PE=2 SV=1 - [CC50B_MOUSE]	QGnYSAGLPR	N3(Deamidated)	1063.52	0.001	0.02271	High	1.82549	High	1.79371	High	1.775	0
			VnITYnYPVR	N2(Deamidated)	1239.64	0	0.007761	High	3.3667	High	3.33733	High	3.04082	0
418	Q8BHN0	Protein phosphatase 1L OS=Mus musculus GN=Ppm1l PE=1 SV=1 - [PPM1L_MOUSE]	DHMEDRFEVLTDLAnK(T)	M3(Oxidation); N15(Deamidated)	1949.9	0.001	0.003242					High	2.82458	1
419	Q8BI84-2	Isoform 2 of Melanoma inhibitory activity protein 3 OS=Mus musculus GN=Mia3 - [MIA3_MOUSE]	TGnSSPASVER	N3(Deamidated)	1105.52	0	3.686e-06	High	2.18245	High	4.1163	High	3.63949	0
			nLSWQQEQDVAAVVGK	N1(Deamidated)	1772.89	0	0.0005458	High	3.91121	High	3.62133			0
420	Q8BJ83-2	Isoform 2 of TM2 domain-containing protein 3 OS=Mus musculus GN=Tm2d3 - [TM2D3_MOUSE]	YFAnCTVR	N4(Deamidated); C5(Carbamidomethyl)	1031.46	0	0.001061	High	2.07153	High	2.60164	High	1.98833	0
			DHIHCLGnR(T)	C5(Carbamidomethyl); N8(Deamidated)	1122.51	0.001	0.00371			High	2.42355	High	2.44784	0
421	Q8BJS4-3	Isoform 3 of SUN domain-containing protein 2 OS=Mus musculus GN=Sun2 - [SUN2_MOUSE]	ALSPnSTISSAPK	N5(Deamidated)	1273.67	0	9.35e-05	High	3.28024	High	3.3543	High	2.97712	0
422	Q8BK48	Pyrethroid hydrolase Ces2e OS=Mus musculus GN=Ces2e PE=1 SV=1 - [EST2E_MOUSE]	IVAnLSGCAAVnSETLMCCLR	N4(Deamidated); C8(Carbamidomethyl); M17(Oxidation); C18(Carbamidomethyl); C19(Carbamidomethyl)	2356.09	0	1.372e-08	High	3.55177	High	4.18713	High	4.27388	0
			IVAnLSGCAAVnSETLMCCLR	N4(Deamidated); C8(Carbamidomethyl); N12(Deamidated); M17(Oxidation); C18(Carbamidomethyl); C19(Carbamidomethyl)	2357.05	0	0.001071					High	4.55726	0
423	Q8BKU8-2	Isoform 2 of Transmembrane protein 87B OS=Mus musculus GN=Tmem87b - [TM87B_MOUSE]	nISSQEGSTDVVAR	N1(Deamidated)	1463.7	0	5.724e-08	High	3.27257	High	4.39025	High	4.22459	0
424	Q8BLF1	Neutral cholesterol ester hydrolase 1 OS=Mus musculus GN=Nceh1 PE=1 SV=1 - [NCEH1_MOUSE]	GnYDFVEAMIVnnHTSLDVER	M9(Oxidation); N13(Deamidated)	2440.11	0	0.0008353			High	2.40095	High	4.02768	0
425	Q8BM88	Cathepsin O OS=Mus musculus GN=Ctso PE=2 SV=1 - [CATO_MOUSE]	WLnETQLK	N3(Deamidated)	1032.54	0.002	0.1342	High	1.92259	High	2.08162			0
			YPAEGQRPIPnVSLPLR	N11(Deamidated)	1908.04	0.001	0.001071			High	2.64804	High	2.58456	0
426	Q8BMW7	Magnesium transporter NIPA3 OS=Mus musculus GN=Nipal1 PE=1 SV=2 - [NIPA3_MOUSE]	LPPGEPCHEGYVLSLVCSnSSR	C7(Carbamidomethyl); C17(Carbamidomethyl); N19(Deamidated)	2459.14	0	2.162e-05	High	2.86134	High	3.19617	High	3.36726	0
			ASCEITnVSESLPYPVVYTnLnSSK	C3(Carbamidomethyl); N7(Deamidated); N20(Deamidated)	2774.32	0	0.0011	High	3.23392	High	3.81759	High	3.33408	0
427	Q8BND5-3	Isoform 3 of Sulfhydryl oxidase 1 OS=Mus musculus GN=Qsox1 - [QSOX1_MOUSE]	nGSGATLPGAGAnVQTLR	N1(Deamidated)	1684.86	0	1.815e-05	High	2.35098	High	2.67486	High	3.04833	0
428	Q8BTJ4-2	Isoform 2 of Bis(5'-adenosyl)-triphosphatase enpp4 OS=Mus musculus GN=Enpp4 - [ENPP4_MOUSE]	InVTEVYDK	N2(Deamidated)	1081.54	0	0.0008126	High	2.7044	High	2.95748	High	2.55845	0
			SnYSVIDLTPVAAILPK	N2(Deamidated)	1802	0	0.0003833	High	3.07758	High	3.48381	High	3.75285	0
429	Q8BWP8-2	Isoform 2 of Beta-1,4-glucuronyltransferase 1 OS=Mus musculus GN=B4gat1 - [B4GA1_MOUSE]	VAQPGInYALGTnTSYPnnLLR	N13(Deamidated)	2377.23	0	7.737e-08	High	3.67038	High	3.89479	High	3.13512	0
430	Q8BWQ1	UDP-glucuronosyltransferase 2A3 OS=Mus musculus GN=Ugt2a3 PE=1 SV=1 - [UD2A3_MOUSE]	nLTEEKAnLIASVLAQIPQK	N1(Deamidated)	2181.23	0	9.513e-06	High	3.53073	High	5.40336	High	5.61598	1
			HCGQLPIPLSYVPVVMSELTDnMTFTER	C2(Carbamidomethyl); M16(Oxidation); N22(Deamidated); M23(Oxidation)	3267.55	0	3.136e-06	High	4.54445	High	4.62945	High	4.13341	0
			HCGQLPIPLSYVPVVMSELTDnMTFTER	C2(Carbamidomethyl); Q4(Deamidated); M16(Oxidation); N22(Deamidated); M23(Oxidation)	3268.54	0	3.794e-05			High	2.99017			0
431	Q8BWT1	3-ketoacyl-CoA thiolase, mitochondrial OS=Mus musculus GN=Acaa2 PE=1 SV=3 - [THIM_MOUSE]	DGTVTAGnASGVSDGAGAVIIASEDAVK	N8(Deamidated)	2533.25	0.001	0.001072					High	3.00251	0
432	Q8BXA5	Cleft lip and palate transmembrane protein 1-like protein OS=Mus musculus GN=Clptm1l PE=2 SV=1 - [CLP1L_MOUSE]	TVnVSVPK	N3(Deamidated)	844.48	0.003	0.04805					High	1.60929	0
433	Q8BXB6	Solute carrier organic anion transporter family member 2B1 OS=Mus musculus GN=Slco2b1 PE=1 SV=1 - [SO2B1_MOUSE]	SLDFEASLCLPTTMAPASALSnGSCSSHTETK	C9(Carbamidomethyl); M14(Oxidation); N22(Deamidated); C25(Carbamidomethyl)	3387.52	0	1.203e-05	High	2.4567	High	2.9709	High	4.57416	0
			SQVFYTnCSCVAGnGTVPAGSCESACSR	N7(Deamidated); C8(Carbamidomethyl); C10(Carbamidomethyl); N14(Deamidated); C22(Carbamidomethyl); C26(Carbamidomethyl)	3028.23	0	4.309e-05	High	2.56713	High	3.28601			0
434	Q8BXN9-3	Isoform 3 of Transmembrane protein 87A OS=Mus musculus GN=Tmem87a - [TM87A_MOUSE]	EnATnVTFTGDK	N2(Deamidated); N5(Deamidated)	1298.58	0	0.0009705	High	3.00915	High	2.11729	High	3.42287	0
			LFQnCSELYK	N4(Deamidated); C5(Carbamidomethyl)	1302.61	0	0.0009324			High	2.42388	High	2.39136	0
			QEAKEnATnVTFTGDK	N6(Deamidated); N9(Deamidated)	1754.81	0	0.02144	High	2.92201			High	3.5614	1
435	Q8BXZ1	Protein disulfide-isomerase TMX3 OS=Mus musculus GN=Tmx3 PE=1 SV=2 - [TMX3_MOUSE]	LVAIAVIDEKnTSLEHTR	N11(Deamidated)	2010.09	0	5.11e-08	High	2.87542	High	3.44244	High	3.94227	1
436	Q8BY89-2	Isoform 2 of Choline transporter-like protein 2 OS=Mus musculus GN=Slc44a2 - [CTL2_MOUSE]	KnITDLVEGAK	N2(Deamidated)	1188.65	0	0.0001181	High	3.42338	High	3.55684	High	3.25963	1
			GVLMVGnETTYEDGHGAR	M4(Oxidation); N7(Deamidated)	1922.86	0	1.265e-05	High	3.58353	High	3.20715	High	4.07948	0
			TCnPETFPLRnESLQCPTAR	C2(Carbamidomethyl); N11(Deamidated); C16(Carbamidomethyl)	2392.11	0	0.0003825	High	2.41327	High	3.24439	High	2.62697	1
			nITDLVEGAK	N1(Deamidated)	1060.56	0.002	0.01413	High	2.04676			High	1.9697	0
437	Q8BYB9	Protein O-glucosyltransferase 1 OS=Mus musculus GN=Poglut1 PE=1 SV=2 - [PGLT1_MOUSE]	KnSTAYFR	N2(Deamidated)	987.492	0.003	0.02757	High	2.25962	High	2.30355	High	2.21918	1
			FLSYnVTR	N5(Deamidated)	1000.51	0.002	0.03244			High	2.0393			0
438	Q8BYI8	Uncharacterized protein KIAA1467 OS=Mus musculus GN=Kiaa1467 PE=2 SV=1 - [K1467_MOUSE]	APDSnSSSLLITTR	N5(Deamidated)	1462.74	0	4.752e-05	High	3.02399	High	3.31274	High	3.82285	0
439	Q8BYU6	Torsin-1A-interacting protein 2 OS=Mus musculus GN=Tor1aip2 PE=1 SV=1 - [TOIP2_MOUSE]	HLnASnPSEPATIIFTAAR	N3(Deamidated)	2011.03	0	7.516e-11	High	4.10847	High	4.00056	High	5.11746	0
440	Q8BYW9	EGF domain-specific O-linked N-acetylglucosamine transferase OS=Mus musculus GN=Eogt PE=1 SV=1 - [EOGT_MOUSE]	LnITQEGPK	N2(Deamidated)	1000.53	0	0.03332	High	2.48095	High	1.60774	High	2.19379	0
441	Q8C0Z1	Protein ITFG3 OS=Mus musculus GN=Itfg3 PE=1 SV=1 - [ITFG3_MOUSE]	nTnSSnnLTR	N1(Deamidated); N3(Deamidated); N6(Deamidated)	1123.49	0.001	0.01737	High	1.8695	High	2.54817			0
			KPILGHYKPDTLAVVIEnGTSIDR	N18(Deamidated)	2637.44	0	3.578e-07					High	4.25359	0
442	Q8C129	Leucyl-cystinyl aminopeptidase OS=Mus musculus GN=Lnpep PE=1 SV=1 - [LCAP_MOUSE]	EETLLYDnATSSVADR	N8(Deamidated)	1784.83	0	9.254e-05	High	4.3705	High	3.74744	High	3.85193	0
			DIILHSTGHnISR	N10(Deamidated)	1463.76	0	5.432e-06	High	3.64053	High	3.68607	High	2.64168	0
			nLSQDVnGTLVSVYAVPEK	N1(Deamidated); N7(Deamidated)	2035.03	0	2.356e-09			High	2.18276			0
			EETLLYDnATSSVADRK	N8(Deamidated)	1912.92	0	0.03773	High	2.54112					1
			QVEILEYPYHEQIAVVAPEPLLTGHnYTLK	Q1(Deamidated); N26(Deamidated)	3466.81	0.001	0.001366					High	2.72178	0
443	Q8C165	Probable carboxypeptidase PM20D1 OS=Mus musculus GN=Pm20d1 PE=2 SV=1 - [P20D1_MOUSE]	HYAnITnGMYR	N4(Deamidated); N7(Deamidated); M9(Oxidation)	1357.59	0	0.0006228	High	3.3205	High	3.46135	High	3.29387	0
			HYAnITnGMYR	N4(Deamidated); M9(Oxidation)	1356.6	0	0.0008051	High	2.90589	High	2.86642	High	3.33379	0
			GAIQIPTVSFSHEESnTTALAEFGEYIR	N16(Deamidated)	3068.49	0	8.112e-07	High	4.01741	High	4.32905	High	4.65121	0
			GALDLMLQVnMTPGHSSAPPK	M6(Oxidation); N10(Deamidated); M11(Oxidation)	2197.07	0	1.89e-05	High	2.24785					0
			HYAnITnGMYR	N4(Deamidated); N7(Deamidated)	1341.59	0	0.03202	High	2.94428					0
			HYAnITnGMYR	N4(Deamidated)	1340.61	0.001	0.1102	High	1.99644					0
444	Q8C196	Carbamoyl-phosphate synthase [ammonia], mitochondrial OS=Mus musculus GN=Cps1 PE=1 SV=2 - [CPSM_MOUSE]	DGSIDLVInLPnnnTK	N13(Deamidated)	1727.88	0.001	0.001433					High	2.64534	0
445	Q8C2R4	DiGeorge syndrome critical region gene 2, isoform CRA_d OS=Mus musculus GN=Dgcr2 PE=2 SV=1 - [Q8C2R4_MOUSE]	VnGSLATFSTDQELR	N2(Deamidated)	1638.8	0	4.485e-06			High	4.0462			0
446	Q8C341	SUN domain-containing ossification factor OS=Mus musculus GN=Suco PE=1 SV=3 - [SUCO_MOUSE]	SISEnATATTEPK	N5(Deamidated)	1349.64	0	1.145e-05	High	2.99049	High	3.27136	High	2.68994	0
447	Q8C7X2-3	Isoform 3 of ER membrane protein complex subunit 1 OS=Mus musculus GN=Emc1 - [EMC1_MOUSE]	FInYnQTVSR	N5(Deamidated)	1242.61	0	0.0137	High	2.72391	High	2.79145	High	2.67964	0
			FInYnQTVSR	N3(Deamidated); N5(Deamidated)	1243.6	0	0.0014			High	2.57791			0
448	Q8CBM2	Aspartyl/asparaginyl beta-hydroxylase OS=Mus musculus GN=Asph PE=2 SV=1 - [Q8CBM2_MOUSE]	VYEEVLnVTPnDGFAK	N7(Deamidated)	1795.88	0	0.0008353	High	2.75978			High	2.99927	0
449	Q8CFX3	Protein Pcdh1 OS=Mus musculus GN=Pcdh1 PE=2 SV=1 - [Q8CFX3_MOUSE]	AnDSDQGAnAEIDYTFHQAPEVVR	N2(Deamidated)	2648.19	0	2.483e-05	High	5.54885	High	5.44308	High	4.62237	0
			YGTALVHLYVnETLAnR	N11(Deamidated); N16(Deamidated)	1935.99	0	2.772e-09	High	3.69677	High	4.2949	High	3.67325	0
450	Q8CG14	Complement C1s-A subcomponent OS=Mus musculus GN=C1sa PE=2 SV=2 - [CS1A_MOUSE]	GVDSCHGDSGGAFAFQVPnVTVPK	C5(Carbamidomethyl); N19(Deamidated)	2447.14	0	5.364e-07	High	2.80303	High	4.54266	High	3.71724	0
451	Q8CID3	Protein FAM20A OS=Mus musculus GN=Fam20a PE=1 SV=1 - [FA20A_MOUSE]	DLGTASHnFSGALPR	N8(Deamidated)	1543.76	0	0.00757	High	3.23842	High	2.63796			0
452	Q8CIF4	Biotinidase OS=Mus musculus GN=Btd PE=1 SV=2 - [BTD_MOUSE]	GHLIIAQVATnPQGLTGTGnTTSEMDPSHR	N20(Deamidated); M25(Oxidation)	3120.52	0	3.556e-09	High	5.00564	High	6.08531	High	5.58988	0
			FnDTEVLQR	N2(Deamidated)	1122.55	0	0.0009546	High	3.57828	High	3.58496	High	3.71167	0
			YQFnTnVVFSDnGTLVDR	N12(Deamidated)	2089.99	0	1.48e-17	High	4.74491	High	4.47878	High	5.40294	0
			GVQIIVFPEDGIHGFnFTR	N16(Deamidated)	2147.11	0	6.107e-13			High	2.43833	High	4.77759	0
			GHLIIAQVATnPQGLTGTGnTTSEMDPSHRK	N20(Deamidated); M25(Oxidation)	3248.61	0	1.124e-05	High	2.86559			High	3.26402	1
			GHLIIAQVATnPQGLTGTGnTTSEMDPSHR	N20(Deamidated)	3104.51	0	0.000777	High	4.33327					0
453	Q8CJ85	CD209 antigen-like protein B OS=Mus musculus GN=Cd209b PE=2 SV=1 - [Q8CJ85_MOUSE]	IPIFQGQnESIQEK	N8(Deamidated)	1631.83	0	6.164e-07			High	4.10412	High	3.71755	0
454	Q8CJH3	Plexin-B1 OS=Mus musculus GN=Plxnb1 PE=1 SV=2 - [PLXB1_MOUSE]	VVAVSPAnISR	N8(Deamidated)	1113.63	0.001	0.007431	High	2.27348	High	2.44464	High	2.2438	0
			YTSDPnVTSVGPSK	N6(Deamidated)	1452.69	0	0.05839	High	2.81912	High	2.3971			0
455	Q8JZZ0	UDP-glucuronosyltransferase 3A2 OS=Mus musculus GN=Ugt3a2 PE=2 SV=2 - [UD3A2_MOUSE]	VSQVLHEGGHnVTK	Q3(Deamidated); N11(Deamidated)	1506.76	0	3.103e-05	High	3.0753	High	3.5834	High	3.01013	0
			VSQVLHEGGHnVTK	N11(Deamidated)	1505.78	0	4.897e-07	High	4.05195	High	4.82663	High	4.58491	0
456	Q8JZZ7	Latrophilin-2 (Fragment) OS=Mus musculus GN=Lphn2 PE=1 SV=2 - [LPHN2_MOUSE]	SLGQFLSTEnATIK	N10(Deamidated)	1509.79	0	4.422e-05	High	2.65755	High	3.24152			0
457	Q8K0E8	Fibrinogen beta chain OS=Mus musculus GN=Fgb PE=2 SV=1 - [FIBB_MOUSE]	GTAGnALMDGASQLVGEnR(T)	M8(Oxidation); N18(Deamidated)	1877.88	0	1.777e-10	High	4.54323	High	4.54522	High	4.05716	0
			YKGTAGnALMDGASQLVGEnR(T)	M10(Oxidation); N20(Deamidated)	2169.03	0	0.002142	High	4.06983	High	3.42131	High	4.04919	1
			GTAGnALMDGASQLVGEnR(T)	N18(Deamidated)	1861.88	0	4.057e-05	High	4.63422					0
458	Q8K0L2-2	Isoform 2 of Ectonucleoside triphosphate diphosphohydrolase 8 OS=Mus musculus GN=Entpd8 - [ENTP8_MOUSE]	SLFnFSSCK	N4(Deamidated); C8(Carbamidomethyl)	1090.49	0.007	0.1955	High	1.99065					0
459	Q8K1B3	Gltpd2 protein OS=Mus musculus GN=Gltpd2 PE=2 SV=1 - [Q8K1B3_MOUSE]	AAGVLEDVYnR(T)	N10(Deamidated)	1207.6	0	0.004338	High	3.55109	High	3.0794	High	3.06834	0
460	Q8K297	Procollagen galactosyltransferase 1 OS=Mus musculus GN=Colgalt1 PE=1 SV=2 - [GT251_MOUSE]	AMnTSQVEAMGIQMLPGYR	M2(Oxidation); N3(Deamidated); M10(Oxidation); M14(Oxidation)	2145.97	0	1.786e-07			High	3.42518	High	2.89921	0
461	Q8K2I4	Beta-mannosidase OS=Mus musculus GN=Manba PE=2 SV=1 - [MANBA_MOUSE]	GHGnQTGYnMTILFALDGGLK	N4(Deamidated); N9(Deamidated); M10(Oxidation)	2225.07	0	3.164e-13					High	4.79322	0
462	Q8K385	Ferric-chelate reductase 1 OS=Mus musculus GN=FRRS1 PE=1 SV=1 - [FRRS1_MOUSE]	YnVTDTPK	N2(Deamidated)	938.447	0.001	0.003235			High	2.30537	High	2.54968	0
463	Q8K440-2	Isoform 2 of ATP-binding cassette sub-family A member 8-B OS=Mus musculus GN=Abca8b - [ABC8B_MOUSE]	nHSFSFACnTK	N1(Deamidated); C8(Carbamidomethyl)	1313.56	0	0.001036					High	2.07644	0
464	Q8K441	ATP-binding cassette sub-family A member 6 OS=Mus musculus GN=Abca6 PE=2 SV=2 - [ABCA6_MOUSE]	TSLLVInnTESnIEDFLQSLK	N7(Deamidated)	2379.25	0	5.014e-16			High	5.91421	High	5.94065	0
			nATnSLSYnGAIIVSGR	N1(Deamidated)	1737.88	0	1.555e-06					High	3.01054	0
465	Q8K4Q8	Collectin-12 OS=Mus musculus GN=Colec12 PE=1 SV=1 - [COL12_MOUSE]	VQSLQTLAAnnSALAK	N10(Deamidated)	1629.89	0	4.927e-06	High	4.01609	High	4.10321	High	3.56396	0
			HTDDLTSLnnTLVnIR	N9(Deamidated)	1826.93	0	0.02907	High	4.02501	High	3.89515	High	4.95585	0
			ETLQnnSFLITTVnK	N6(Deamidated); N14(Deamidated)	1723.88	0	5.73e-06	High	3.82999	High	3.91461	High	3.28175	0
			DLQDLHKDTEnR(T)	N11(Deamidated)	1484.7	0.001	0.006444			High	2.69987	High	2.38635	1
466	Q8QZR3	Pyrethroid hydrolase Ces2a OS=Mus musculus GN=Ces2a PE=1 SV=1 - [EST2A_MOUSE]	TVAnLSGCEATDSEALIHCLR	N4(Deamidated); C8(Carbamidomethyl); C19(Carbamidomethyl)	2318.08	0	8.401e-09	High	4.65973	High	5.06448	High	4.97874	0
467	Q8R084	Protein Ugt2b1 OS=Mus musculus GN=Ugt2b1 PE=2 SV=1 - [Q8R084_MOUSE]	WVGnWTYELK	N4(Deamidated)	1296.63	0	0.001574	High	1.89212			High	2.55854	0
468	Q8R0F3	Sulfatase-modifying factor 1 OS=Mus musculus GN=Sumf1 PE=1 SV=2 - [SUMF1_MOUSE]	FVnSTGYLTEAEK	N3(Deamidated)	1459.7	0	8.174e-07	High	3.34975	High	3.49739	High	2.6613	0
469	Q8R0T6	Probable G-protein coupled receptor 97 OS=Mus musculus GN=Gpr97 PE=2 SV=3 - [GPR97_MOUSE]	SLFGALPGnR(S)	N9(Deamidated)	1032.55	0	0.001179	High	2.32814	High	2.50128	High	2.44604	0
			LQEGHEYDTFDLnDTAQCFTK	N13(Deamidated); C18(Carbamidomethyl)	2533.09	0	0.004334	High	3.23639					0
470	Q8R0Z6	Angiopoietin-related protein 6 OS=Mus musculus GN=Angptl6 PE=2 SV=1 - [ANGL6_MOUSE]	GQQQVLPLPLAPLVPLSLVGSASnTSR	N24(Deamidated)	2743.55	0	1.417e-07			High	3.63485	High	4.90138	0
471	Q8R121	Protein Z-dependent protease inhibitor OS=Mus musculus GN=Serpina10 PE=1 SV=1 - [ZPI_MOUSE]	ASQQLSnETSSFGFnLLR	N7(Deamidated)	1999.98	0	3.084e-09	High	4.36814	High	4.74502	High	4.73518	0
			EGnFTSTFDKK	N3(Deamidated)	1274.59	0	0.05735	High	2.6995					1
472	Q8R143	Pituitary tumor-transforming gene 1 protein-interacting protein OS=Mus musculus GN=Pttg1ip PE=1 SV=1 - [PTTG_MOUSE]	VGCSEYTnR(S)	C3(Carbamidomethyl); N8(Deamidated)	1086.46	0	0.0002417	High	3.45988	High	3.51005			0
473	Q8R180	ERO1-like protein alpha OS=Mus musculus GN=Ero1l PE=1 SV=2 - [ERO1A_MOUSE]	WGHnVTEFQQR	N4(Deamidated)	1402.65	0	0.00428	High	1.40975					0
474	Q8R2E9	ERO1-like protein beta OS=Mus musculus GN=Ero1lb PE=1 SV=1 - [ERO1B_MOUSE]	LGAInSTLSnESK	N5(Deamidated); N10(Deamidated)	1335.67	0	3.765e-05	High	2.41826	High	2.86251	High	2.47187	0
			LGAInSTLSnESK	N5(Deamidated)	1334.68	0	2.026e-06	High	3.36052	High	3.65071	High	3.40047	0
475	Q8R2Q8	Bone marrow stromal antigen 2 OS=Mus musculus GN=Bst2 PE=1 SV=1 - [BST2_MOUSE]	TQDSLLQAETQAnSCnLTVVTLQESLEK	C15(Carbamidomethyl); N16(Deamidated)	3121.53	0	8.396e-07	High	3.35354	High	4.38497	High	5.02371	0
			nTTHLLQR	N1(Deamidated)	983.528	0	0.002289	High	2.65216	High	2.70091	High	2.22285	0
476	Q8R2R1	Protein O-mannosyl-transferase 1 OS=Mus musculus GN=Pomt1 PE=2 SV=1 - [POMT1_MOUSE]	FVHVnTSAILK	N5(Deamidated)	1229.69	0	0.001267	High	2.23124	High	2.73529	High	2.63436	0
477	Q8R2S8	CD177 antigen OS=Mus musculus GN=Cd177 PE=2 SV=1 - [CD177_MOUSE]	HGDLCnDVnSTK	C5(Carbamidomethyl); N9(Deamidated)	1360.58	0	0.0008364			High	2.02981	High	2.64127	0
478	Q8R3G9	Tetraspanin-8 OS=Mus musculus GN=Tspan8 PE=2 SV=1 - [TSN8_MOUSE]	ILnETLYEnAK	N3(Deamidated)	1308.67	0	0.0002502	High	3.35888	High	3.06026	High	3.67435	0
479	Q8R3H7	Heparan sulfate 2-O-sulfotransferase 1 OS=Mus musculus GN=Hs2st1 PE=1 SV=2 - [HS2ST_MOUSE]	YHVLHInTTK	N7(Deamidated)	1226.65	0	0.0007841	High	2.32998	High	2.78752	High	2.92431	0
480	Q8R4U0	Stabilin-2 OS=Mus musculus GN=Stab2 PE=1 SV=1 - [STAB2_MOUSE]	VLLnLTTVAAnHGYTK	N4(Deamidated)	1715.94	0	3.576e-11	High	3.24016	High	3.92288	High	4.27892	0
			nAnCSTVSPGQTQCTCQK	N3(Deamidated); C4(Carbamidomethyl); C14(Carbamidomethyl); C16(Carbamidomethyl)	2041.84	0	2.301e-06	High	1.58815	High	2.65722	High	2.69798	0
			ITnGTVGVR	N3(Deamidated)	917.506	0	0.001071	High	2.53209	High	2.38035	High	2.94472	0
			DIEHHLTnVnVSFYDDLVnGTVLK	N10(Deamidated); N19(Deamidated)	2744.35	0	7.763e-14	High	3.81025	High	4.58782	High	4.81115	0
			SMAnQIITFnISSK	M2(Oxidation); N10(Deamidated)	1570.78	0	5.774e-08	High	3.21532	High	3.81199	High	3.97551	0
			CDnnDTIIVR	C1(Carbamidomethyl); N4(Deamidated)	1220.56	0	0.006192	High	3.35413	High	2.20559	High	2.60675	0
			ADGnITIEGASFVDGDnAATnGVVHIInK	N4(Deamidated)	2913.44	0.001	0.009158			High	2.05283	High	2.57793	0
			GMCYDQYKPTGQCQCHTGFnGTACELCLPGR	M2(Oxidation); C3(Carbamidomethyl); Q6(Deamidated); C13(Carbamidomethyl); C15(Carbamidomethyl); N20(Deamidated); C24(Carbamidomethyl); C27(Carbamidomethyl)	3684.5	0	0.001134			High	2.2837			0
			GMCYDQYKPTGQCQCHTGFnGTACELCLPGR	M2(Oxidation); C3(Carbamidomethyl); C13(Carbamidomethyl); C15(Carbamidomethyl); N20(Deamidated); C24(Carbamidomethyl); C27(Carbamidomethyl)	3683.51	0	0.000122			High	3.08016	High	2.91127	0
			nRCDnnDTIIVR	C3(Carbamidomethyl); N6(Deamidated)	1490.7	0	9.425e-05			High	3.92202	High	3.91182	1
			DCVEInSCLLPSSGGCHDnATCLYVGPGQnECECK	C2(Carbamidomethyl); C8(Carbamidomethyl); C16(Carbamidomethyl); C22(Carbamidomethyl); Q29(Deamidated); C32(Carbamidomethyl); C34(Carbamidomethyl)	4001.65	0	0.001869			High	2.26791			0
481	Q8R4Y4-2	Isoform 2 of Stabilin-1 OS=Mus musculus GN=Stab1 - [STAB1_MOUSE]	AYTIFVPTnHSLETQGnnSVLGIDTVR	N9(Deamidated); N17(Deamidated)	2948.47	0	1.284e-05	High	4.7645	High	3.89524	High	4.72897	0
			nVTAAAESFGYK	N1(Deamidated)	1258.6	0	0.001984	High	3.9751	High	3.27604	High	3.39621	0
			GCADYCnQTITK	C2(Carbamidomethyl); C6(Carbamidomethyl); Q8(Deamidated)	1431.59	0	0.013	High	2.86877	High	3.98061	High	3.79984	0
			nSSITLPADSR	N1(Deamidated)	1161.58	0	0.05914	High	2.90971	High	2.81697	High	2.39564	0
			KGCADYCnQTITK	C3(Carbamidomethyl); C7(Carbamidomethyl); N8(Deamidated)	1559.69	0	0.00911	High	3.27045	High	3.05193			1
			DPCLTnFGGCPSnSTFCLYR	C3(Carbamidomethyl); C10(Carbamidomethyl); N13(Deamidated); C17(Carbamidomethyl)	2366.99	0	2.656e-08			High	4.03981			0
			FCnESMGnCGSTGLAQPCHSDAHCVIQEGVAR	C2(Carbamidomethyl); N3(Deamidated); M6(Oxidation); C9(Carbamidomethyl); C18(Carbamidomethyl); C24(Carbamidomethyl)	3566.47	0	0.002283			High	2.95556			0
			HCDEEQHQTVLGSCVDCQALnTSVCPPnSVK	C2(Carbamidomethyl); C14(Carbamidomethyl); C17(Carbamidomethyl); N21(Deamidated); C25(Carbamidomethyl)	3570.55	0	3.347e-07			High	4.15913			0
482	Q8R5M8-5	Isoform 5 of Cell adhesion molecule 1 OS=Mus musculus GN=Cadm1 - [CADM1_MOUSE]	VSLTnVSISDEGR	N5(Deamidated)	1377.69	0	6.143e-07	High	3.1661	High	3.73042	High	3.46497	0
			FQLLnFSSSELK	N5(Deamidated)	1413.73	0	0.001071	High	3.28321	High	2.90124	High	3.34114	0
			DTAVEGEEIEVnCTAMASKPATTIR	N12(Deamidated); C13(Carbamidomethyl); M16(Oxidation)	2710.26	0	2.075e-06			High	3.97691	High	3.85164	0
			VDDEMPQHAVLSGPnLFInnLnKTDnGTYR	M5(Oxidation); N22(Deamidated); N26(Deamidated)	3390.61	0	1.484e-06			High	3.54884	High	3.85896	1
			VDDEMPQHAVLSGPnLFInnLnK(T)	N22(Deamidated)	2566.27	0	0.0002428	High	4.60236					0
483	Q8VBZ3	Cleft lip and palate transmembrane protein 1 homolog OS=Mus musculus GN=Clptm1 PE=2 SV=1 - [CLPT1_MOUSE]	DYYPInESLASLPLR	N6(Deamidated)	1751.9	0	4.474e-07	High	3.83348	High	4.20021	High	4.05029	0
484	Q8VCC2	Liver carboxylesterase 1 OS=Mus musculus GN=Ces1 PE=2 SV=1 - [EST1_MOUSE]	TAASILWQAYPILnISEK	N14(Deamidated)	2019.09	0	5.708e-08	High	4.81665	High	4.20934	High	5.14221	0
485	Q8VCF1-2	Isoform 2 of Soluble calcium-activated nucleotidase 1 OS=Mus musculus GN=Cant1 - [CANT1_MOUSE]	ISHYnDTYPLSPPQR	N5(Deamidated)	1788.87	0	0.005598	High	3.46816					0
486	Q8VCI0	Phospholipase B-like 1 OS=Mus musculus GN=Plbd1 PE=1 SV=1 - [PLBL1_MOUSE]	DQGnVTDMASMK	N4(Deamidated); M8(Oxidation); M11(Oxidation)	1329.54	0	0.0004559	High	1.68177	High	3.0767	High	2.35627	0
			nGDAYGYYnDSIK	N1(Deamidated); N9(Deamidated)	1481.61	0	0.0003637	High	3.20715	High	3.05224	High	2.62463	0
			DQGnVTDMASMK	N4(Deamidated); M11(Oxidation)	1313.54	0	0.04563	High	2.80047					0
			nGDAYGYYnDSIK	N9(Deamidated)	1480.63	0	1.133e-06					High	3.61898	0
487	Q8VCS0	N-acetylmuramoyl-L-alanine amidase OS=Mus musculus GN=Pglyrp2 PE=1 SV=1 - [PGRP2_MOUSE]	LEPEHLQLQnISQEQLAQVATLATK	N10(Deamidated)	2803.49	0	3.509e-09	High	5.46444			High	4.73638	0
			GFGVAFVGnYTGSLPnEAALnTVR	N9(Deamidated)	2455.24	0	1.749e-12	High	3.83881			High	4.76011	0
488	Q8VCT4	Carboxylesterase 1D OS=Mus musculus GN=Ces1d PE=1 SV=1 - [CES1D_MOUSE]	nTTSYPPMCSQDAVGGQVLSELFTnR	N1(Deamidated); M8(Oxidation); C9(Carbamidomethyl)	2889.32	0	1.483e-07	High	4.29287	High	4.75538	High	4.16596	0
			nTTSYPPMCSQDAVGGQVLSELFTnR	N1(Deamidated); C9(Carbamidomethyl)	2873.32	0	8.339e-05	High	4.99276	High	4.56956	High	3.82041	0
			DGASEEETnLSK	N9(Deamidated)	1280.55	0	0.0004517	High	2.34426					0
			nTTSYPPMCSQDAVGGQVLSELFTnR	N1(Deamidated); C9(Carbamidomethyl); N25(Deamidated)	2874.3	0	0.0217	High	3.12541					0
			nTTSYPPMCSQDAVGGQVLSELFTnRK	N1(Deamidated); M8(Oxidation); C9(Carbamidomethyl); N25(Deamidated)	3018.39	0.002	0.01579					High	2.60712	1
489	Q8VCU1	Carboxylesterase 3B OS=Mus musculus GN=Ces3b PE=2 SV=2 - [EST3B_MOUSE]	nVnISYIVnDSFFPQRPEK	N3(Deamidated); N9(Deamidated)	2269.12	0	0.006605	High	3.84717	High	3.05255	High	2.37933	0
			nVnISYIVnDSFFPQRPEK	N3(Deamidated)	2268.14	0	1.211e-07	High	4.17904	High	4.55549	High	4.64658	0
490	Q8VD31	Tapasin-related protein OS=Mus musculus GN=Tapbpl PE=2 SV=2 - [TPSNR_MOUSE]	AGnASLTLPnLTLK	N3(Deamidated)	1413.8	0	8.454e-07	High	3.70307	High	3.90187	High	3.34529	0
491	Q8VEB4	Group XV phospholipase A2 OS=Mus musculus GN=Pla2g15 PE=1 SV=1 - [PAG15_MOUSE]	VSLQELPGSEHIEMLAnATTLAYLK	M14(Oxidation); N17(Deamidated)	2745.42	0	0.0007605	High	4.26501	High	3.06445	High	3.52068	0
492	Q8VEK0	Cell cycle control protein 50A OS=Mus musculus GN=Tmem30a PE=1 SV=1 - [CC50A_MOUSE]	CLSPnVTSCACTInFTLK	C1(Carbamidomethyl); N5(Deamidated); C9(Carbamidomethyl); C11(Carbamidomethyl); N14(Deamidated)	2087.95	0	4.529e-05	High	4.787	High	4.52702	High	4.34306	0
			CLSPnVTSCACTInFTLK	C1(Carbamidomethyl); N5(Deamidated); C9(Carbamidomethyl); C11(Carbamidomethyl)	2086.97	0	2.159e-09	High	3.7274	High	4.39467	High	4.20847	0
493	Q8VHF2-2	Isoform 2 of Cadherin-related family member 5 OS=Mus musculus GN=Cdhr5 - [CDHR5_MOUSE]	ATDADInDILVYTLQEVTPnASK	N20(Deamidated)	2492.26	0	2.349e-10			High	4.16741	High	5.11571	0
494	Q8VI56-2	Isoform 2 of Low-density lipoprotein receptor-related protein 4 OS=Mus musculus GN=Lrp4 - [LRP4_MOUSE]	VLInnSLDEPR	N4(Deamidated)	1270.66	0	0.0003002	High	1.74423	High	2.42503	High	2.30598	0
495	Q8VI78	Phospholipase A1 member A OS=Mus musculus GN=Pla1a PE=2 SV=3 - [PLA1A_MOUSE]	SSEFnASLGTK	N5(Deamidated)	1141.54	0.001	0.006349			High	2.34188			0
496	Q8VIB3	Type 2 lactosamine alpha-2,3-sialyltransferase OS=Mus musculus GN=St3gal6 PE=2 SV=3 - [SIA10_MOUSE]	QnAYHnLTAEQLFLnDIIK	N6(Deamidated)	2246.16	0	0.0001887	High	2.63378			High	3.71707	0
497	Q91WP0	Mannan-binding lectin serine protease 2 OS=Mus musculus GN=Masp2 PE=1 SV=1 - [MASP2_MOUSE]	GDSGGALVFLDnETQR	N12(Deamidated)	1679.79	0	0.04969	High	2.56769	High	2.22375			0
498	Q91WU0	Expressed sequence AU018778 OS=Mus musculus GN=Ces1f PE=2 SV=1 - [Q91WU0_MOUSE]	nATTYPPMCSQDAAR	N1(Deamidated); M8(Oxidation); C9(Carbamidomethyl)	1699.71	0	0.004456	High	3.72726	High	3.42981	High	3.5363	0
			nATTYPPMCSQDAAR	N1(Deamidated); C9(Carbamidomethyl)	1683.72	0	0.0004817	High	3.07585	High	3.17144			0
			nATTYPPMCSQDAAR	N1(Deamidated); M8(Oxidation); C9(Carbamidomethyl); Q11(Deamidated)	1700.68	0.005	0.08853			High	1.7227			0
499	Q91X72	Hemopexin OS=Mus musculus GN=Hpx PE=1 SV=2 - [HEMO_MOUSE]	SWSTVGnCTAALR	N7(Deamidated); C8(Carbamidomethyl)	1423.67	0	2.529e-05	High	2.85708	High	3.02703	High	2.69088	0
500	Q91XA2	Golgi membrane protein 1 OS=Mus musculus GN=Golm1 PE=1 SV=2 - [GOLM1_MOUSE]	AVLVnnITTGEK	N6(Deamidated)	1259.69	0	0.0003223	High	2.56624	High	3.00605	High	2.83565	0
501	Q91XD7	Cysteine-rich with EGF-like domain protein 1 OS=Mus musculus GN=Creld1 PE=2 SV=1 - [CREL1_MOUSE]	nSSHLVCSACFGPCAR	N1(Deamidated); C7(Carbamidomethyl); C10(Carbamidomethyl); C14(Carbamidomethyl)	1823.77	0	2.247e-05	High	3.56589	High	3.66852	High	3.43051	0
502	Q91XL1	Leucine-rich HEV glycoprotein OS=Mus musculus GN=Lrg1 PE=2 SV=1 - [Q91XL1_MOUSE]	SLPPGLFSTSAnLSTLVLR	N12(Deamidated)	1974.11	0	9.477e-05	High	5.46115	High	4.71901	High	4.97985	0
			MFSQnDTR	M1(Oxidation); N5(Deamidated)	1015.42	0.008	0.1639					High	1.78744	0
503	Q91XX1	Protein Pcdhgc3 OS=Mus musculus GN=Pcdhgc3 PE=2 SV=1 - [Q91XX1_MOUSE]	ITVLDAnDnAPAFnQSLYR	N14(Deamidated)	2123.05	0	8.84e-05	High	2.95796	High	3.35881	High	3.55697	0
504	Q91Y47	Coagulation factor XI OS=Mus musculus GN=F11 PE=2 SV=2 - [FA11_MOUSE]	GMnYnSSVVK	M2(Oxidation); N5(Deamidated)	1115.5	0.001	0.004585			High	2.3556			0
505	Q91Y57	Sialic acid-binding Ig-like lectin 12 OS=Mus musculus GN=Siglec12 PE=1 SV=3 - [SIG12_MOUSE]	nGSSLPISEGQSLR	N1(Deamidated)	1445.73	0.001	0.01981			High	2.09557			0
506	Q91Y74	CMP-N-acetylneuraminate-beta-galactosamide-alpha-2,3-sialyltransferase 4 OS=Mus musculus GN=St3gal4 PE=2 SV=1 - [SIA4C_MOUSE]	nSSLGGVInK	N1(Deamidated)	989.529	0	0.0002383	High	2.86319	High	2.88628	High	2.50369	0
			SMAGSGHnVSQEAIAIK	M2(Oxidation); N8(Deamidated)	1716.83	0	0.05208	High	2.63906	High	1.94951	High	2.35382	0
			LRnSSLGGVInK	N3(Deamidated)	1258.71	0	0.001758			High	2.65247	High	2.73802	1
507	Q91YH5-2	Isoform 2 of Atlastin-3 OS=Mus musculus GN=Atl3 - [ATLA3_MOUSE]	ELGGAIDSGAAYVLEQASSHIGnSTQAAVR	N23(Deamidated)	2973.47	0	5.606e-06	High	3.41811	High	4.40703	High	3.60379	0
508	Q91YQ5	Dolichyl-diphosphooligosaccharide--protein glycosyltransferase subunit 1 OS=Mus musculus GN=Rpn1 PE=1 SV=1 - [RPN1_MOUSE]	DEIGnVSTSHLLILDDSVEMEIRPR	N5(Deamidated); M20(Oxidation)	2855.42	0	0.001071	High	1.95195	High	2.17523	High	2.93589	0
509	Q91Z92	Beta-1,3-galactosyltransferase 6 OS=Mus musculus GN=B3galt6 PE=2 SV=1 - [B3GT6_MOUSE]	DAYEnLTAK	N5(Deamidated)	1025.48	0.004	0.1635	High	1.86083					0
510	Q91ZX7	Prolow-density lipoprotein receptor-related protein 1 OS=Mus musculus GN=Lrp1 PE=1 SV=1 - [LRP1_MOUSE]	KLnLDGSnYTLLK	N8(Deamidated)	1479.81	0	1.708e-05	High	2.25818	High	2.40392	High	2.92331	1
			IETILLnGTDRK	N7(Deamidated)	1373.77	0	0.0008628	High	3.0382	High	3.31341	High	3.51873	1
			IETILLnGTDR	N7(Deamidated)	1245.67	0	2.609e-05	High	3.50224	High	3.41823	High	3.76921	0
			LnLDGSnYTLLK	N7(Deamidated)	1351.72	0	7.867e-06	High	3.13882	High	3.4616	High	3.44094	0
			GVTHLnISGLK	N6(Deamidated)	1139.65	0	0.0005494	High	2.98116	High	3.34093	High	2.84605	0
			WTGHnVTVVQR	N5(Deamidated)	1297.67	0	0.004313	High	3.36198	High	2.76586	High	2.99087	0
			DnTTCYEFKK	N2(Deamidated); C5(Carbamidomethyl)	1306.56	0	0.001428	High	2.52938	High	2.81197	High	3.14255	1
			DnATDSVPLR	N2(Deamidated)	1088.52	0	1.171e-05	High	2.99052	High	3.40492	High	2.70814	0
			LnGTDPIVAADSKR	N2(Deamidated)	1457.76	0	0.001071	High	3.19995	High	2.8694	High	3.70597	1
			LnGTDPIVAADSK	N2(Deamidated)	1301.66	0	2.937e-07	High	4.0585	High	4.33403	High	3.66424	0
			FnSTEYQVVTR	N2(Deamidated)	1344.64	0	3.763e-06	High	3.69309	High	3.73397	High	3.75593	0
			VDIPQQPMGIIAVAnDTnSCELSPCR	M8(Oxidation); N15(Deamidated); C20(Carbamidomethyl); C25(Carbamidomethyl)	2902.35	0	3.926e-08	High	4.15401	High	3.67243	High	4.05051	0
			MHLnGSnVQVLHR	M1(Oxidation); N4(Deamidated)	1521.76	0	8.673e-09	High	3.59037	High	3.18681	High	3.83176	0
			MGCQHHCVPTPSGPTCYCnSSFQLQADGK	M1(Oxidation); C3(Carbamidomethyl); C7(Carbamidomethyl); C16(Carbamidomethyl); C18(Carbamidomethyl); N19(Deamidated)	3341.36	0	0.002051	High	2.1614	High	2.68996	High	3.63083	0
			QTGDVTCnCTDGR	C7(Carbamidomethyl); N8(Deamidated); C9(Carbamidomethyl)	1484.58	0	4.77e-05	High	2.9379	High	2.73027	High	2.5326	0
			InnGGCQDLCLLTHQGHVnCSCR	C6(Carbamidomethyl); Q7(Deamidated); C10(Carbamidomethyl); N19(Deamidated); C20(Carbamidomethyl); C22(Carbamidomethyl)	2715.16	0	0.0008094	High	2.85672	High	4.36425	High	3.21361	0
			InnGGCQDLCLLTHQGHVnCSCR	C6(Carbamidomethyl); C10(Carbamidomethyl); N19(Deamidated); C20(Carbamidomethyl); C22(Carbamidomethyl)	2714.17	0	6.349e-06	High	3.28991	High	3.64821	High	3.00967	0
			LTSCATnASMCGDEAR	C4(Carbamidomethyl); N7(Deamidated); M10(Oxidation); C11(Carbamidomethyl)	1760.7	0	6.232e-08	High	4.25861	High	4.31457	High	4.12381	0
			FGTCSQLCnnTK	C4(Carbamidomethyl); C8(Carbamidomethyl); N9(Deamidated)	1430.61	0	5.35e-05	High	2.64331	High	3.25206	High	3.08539	0
			GPCSHLCLInYnR(T)	C3(Carbamidomethyl); C7(Carbamidomethyl); N12(Deamidated)	1604.73	0	4.766e-06	High	2.79618	High	3.53353	High	3.31738	0
			TCVSnCTASQFVCK	C2(Carbamidomethyl); N5(Deamidated); C6(Carbamidomethyl); C13(Carbamidomethyl)	1662.69	0	2.441e-09	High	4.30416	High	3.66282	High	4.52904	0
			GCKDnATDSVPLR	C2(Carbamidomethyl); N5(Deamidated)	1433.67	0	0.0002627	High	2.24109	High	3.19456	High	2.94343	1
			CnASSQFLCSSGR	C1(Carbamidomethyl); N2(Deamidated); C9(Carbamidomethyl)	1474.61	0	7.719e-11	High	4.20043	High	4.29076	High	4.56582	0
			LTSCATnASMCGDEAR	C4(Carbamidomethyl); N7(Deamidated); C11(Carbamidomethyl)	1744.7	0	0.0007445	High	3.73746	High	2.52622			0
			DnDCVDGSDEPAnCTQMTCGVDEFR	C4(Carbamidomethyl); N13(Deamidated); C14(Carbamidomethyl); M17(Oxidation); C19(Carbamidomethyl)	2909.07	0	0.0004089	High	1.60609	High	3.34946			0
			RGCKDnATDSVPLR	C3(Carbamidomethyl); N6(Deamidated)	1589.77	0.001	0.01839	High	2.67449	High	2.77299			2
			WLCDGDnDCGnSEDESnATCSAR	C3(Carbamidomethyl); C9(Carbamidomethyl); N17(Deamidated); C20(Carbamidomethyl)	2633.95	0	1.14e-07	High	3.89542	High	4.10385			0
			RMHLnGSnVQVLHR	M2(Oxidation); N5(Deamidated)	1677.86	0.004	0.0742			High	2.21879	High	2.06541	1
			LHKDnTTCYEFKK	N5(Deamidated); C8(Carbamidomethyl)	1684.8	0.001	0.008617			High	1.76297	High	2.61284	2
			QTGDVTCnCTDGR	Q1(Deamidated); C7(Carbamidomethyl); N8(Deamidated); C9(Carbamidomethyl)	1485.57	0.001	0.009808			High	2.08121			0
			FnSTEYQVVTR	N2(Deamidated); Q7(Deamidated)	1345.63	0	7.993e-05			High	3.22934			0
			CnASSQFLCSSGR	C1(Carbamidomethyl); N2(Deamidated); Q6(Deamidated); C9(Carbamidomethyl)	1475.6	0	0.001229			High	2.60654			0
			TCPLDEFQCnnTLCKPLAWK	C2(Carbamidomethyl); C9(Carbamidomethyl); N10(Deamidated); C14(Carbamidomethyl)	2496.15	0.002	0.1222	High	1.98882			High	2.45264	0
			MHLnGSnVQVLHR	N4(Deamidated)	1505.77	0	0.03083	High	2.85742					0
			VDIPQQPMGIIAVAnDTnSCELSPCR	N15(Deamidated); C20(Carbamidomethyl); C25(Carbamidomethyl)	2886.34	0	0.03424	High	3.51535					0
			AFInGTGVETVVSADLPnAHGLAVDWVSR	N4(Deamidated)	2996.54	0	5.145e-09					High	3.24812	0
			LYWISSGnHTInR	N8(Deamidated)	1561.78	0.001	0.001071					High	3.18714	0
			nSTTLVMHMK	N1(Deamidated); M7(Oxidation); M9(Oxidation)	1194.55	0.002	0.01796					High	1.67277	0
			MGCQHHCVPTPSGPTCYCnSSFQLQADGK	M1(Oxidation); C3(Carbamidomethyl); Q4(Deamidated); C7(Carbamidomethyl); C16(Carbamidomethyl); C18(Carbamidomethyl); N19(Deamidated)	3342.36	0	0.000169					High	3.51698	0
511	Q921I1	Serotransferrin OS=Mus musculus GN=Tf PE=1 SV=1 - [TRFE_MOUSE]	nSTLCDLCIGPLK	N1(Deamidated); C5(Carbamidomethyl); C8(Carbamidomethyl)	1491.73	0	4.977e-06	High	3.96257	High	4.19827	High	3.72576	0
			FDEFFSQGCAPGYEKnSTLCDLCIGPLK	C9(Carbamidomethyl); N16(Deamidated); C20(Carbamidomethyl); C23(Carbamidomethyl)	3254.46	0	3.019e-08	High	4.98861	High	5.87566	High	5.74466	1
			FDEFFSQGCAPGYEKnSTLCDLCIGPLK	Q7(Deamidated); C9(Carbamidomethyl); N16(Deamidated); C20(Carbamidomethyl); C23(Carbamidomethyl)	3255.46	0	0.0006392	High	3.94994					1
512	Q923B6	Metalloreductase STEAP4 OS=Mus musculus GN=Steap4 PE=2 SV=1 - [STEA4_MOUSE]	LRnATITQALTnK	N3(Deamidated)	1444.82	0	0.0001286	High	4.20282	High	4.42381	High	3.75211	1
513	Q99J21	Mucolipin-1 OS=Mus musculus GN=Mcoln1 PE=1 SV=1 - [MCLN1_MOUSE]	GHVDPAnDTFDIDPR	N7(Deamidated)	1669.75	0	0.0001035	High	3.2118	High	3.47893	High	3.14956	0
514	Q99JY8	Lipid phosphate phosphohydrolase 3 OS=Mus musculus GN=Ppap2b PE=1 SV=1 - [LPP3_MOUSE]	LRPHFLSVCDPDFSQInCSEGYIQnYR	C9(Carbamidomethyl); N17(Deamidated); C18(Carbamidomethyl)	3316.54	0	8.374e-09					High	4.04803	0
515	Q99K41	EMILIN-1 OS=Mus musculus GN=Emilin1 PE=1 SV=1 - [EMIL1_MOUSE]	LEDRFnSTLGPSEEQEK	N6(Deamidated)	1979.93	0	7.076e-06	High	3.39862	High	3.91307	High	3.39982	1
			ESnSTSLTQAALLEK	N3(Deamidated)	1592.81	0	2.004e-05	High	3.18427	High	3.3473	High	3.30627	0
			LGALnnSLLLLEDR	N5(Deamidated)	1541.86	0	1.44e-06			High	3.7913			0
516	Q99KF1	Transmembrane emp24 domain-containing protein 9 OS=Mus musculus GN=Tmed9 PE=1 SV=2 - [TMED9_MOUSE]	FTFTSHTPGEHQICLHSnSTK	C14(Carbamidomethyl); N18(Deamidated)	2430.13	0	7.341e-14	High	4.09436	High	4.21975	High	5.19006	0
517	Q99KW9	T-cell immunomodulatory protein OS=Mus musculus GN=Itfg1 PE=2 SV=2 - [TIP_MOUSE]	nTSGSnQQAFLLEnVPCnnASCEEVHR	Q7(Deamidated); C17(Carbamidomethyl); N19(Deamidated); C22(Carbamidomethyl)	3077.34	0	0.0006119	High	3.61586	High	3.38404	High	4.46444	0
518	Q99MB1	Toll-like receptor 3 OS=Mus musculus GN=Tlr3 PE=1 SV=2 - [TLR3_MOUSE]	SEELEFLGnSSLR	N9(Deamidated)	1481.72	0	1.921e-05	High	3.11316	High	3.78396	High	2.70368	0
			LTHIPDDLPSnITVLnLTHnQLR	N11(Deamidated); N16(Deamidated)	2626.39	0	0.0007266			High	2.71505	High	2.41562	0
519	Q99MQ4	Asporin OS=Mus musculus GN=Aspn PE=1 SV=1 - [ASPN_MOUSE]	ITDIEnGTFAnIPR	N6(Deamidated)	1561.79	0	8.996e-08	High	3.64012	High	3.60905	High	3.70657	0
520	Q99MR3	Solute carrier family 12 member 9 OS=Mus musculus GN=Slc12a9 PE=1 SV=2 - [S12A9_MOUSE]	HGHFTGFnGSTLR	N8(Deamidated)	1431.68	0.001	0.009282			High	2.03192			0
521	Q99N28	Cell adhesion molecule 3 OS=Mus musculus GN=Cadm3 PE=1 SV=1 - [CADM3_MOUSE]	MTQESALIFPFLnK(S)	M1(Oxidation); N13(Deamidated)	1655.84	0	2.541e-06	High	3.64163	High	4.14285	High	3.58369	0
522	Q99N32	Beta-klotho OS=Mus musculus GN=Klb PE=1 SV=1 - [KLOTB_MOUSE]	MGQnVSLnLR	M1(Oxidation); N4(Deamidated)	1148.57	0	8.348e-05	High	3.075	High	3.15438			0
523	Q9CPW5	Translocon-associated protein subunit beta OS=Mus musculus GN=Ssr2 PE=1 SV=1 - [SSRB_MOUSE]	IAPASnVSHTVVLRPLK	N6(Deamidated)	1803.05	0	3.729e-08	High	4.16232	High	5.09979	High	4.71037	0
			AGYFnFTSATITYLAQEDGPVVIGSTSAPGQGGILAQR	N5(Deamidated)	3858.95	0	0.0008353			High	1.81263	High	1.83563	0
524	Q9CQ01	Ribonuclease T2 OS=Mus musculus GN=Rnaset2 PE=2 SV=1 - [RNT2_MOUSE]	nCTEPGEQLSSR	N1(Deamidated); C2(Carbamidomethyl)	1378.59	0	0.0008353	High	1.5692	High	2.38413	High	2.69563	0
525	Q9CQ88	Tetraspanin-31 OS=Mus musculus GN=Tspan31 PE=1 SV=1 - [TSN31_MOUSE]	SFDCCGLFnLTTLR	C4(Carbamidomethyl); C5(Carbamidomethyl); N9(Deamidated)	1704.78	0	4.73e-06	High	4.12026	High	4.37847	High	4.35637	0
526	Q9CQW3	Vitamin K-dependent protein Z OS=Mus musculus GN=Proz PE=1 SV=1 - [PROZ_MOUSE]	CSLLHSnISVK	C1(Carbamidomethyl); N7(Deamidated)	1258.65	0	0.03741	High	2.98663	High	2.93018	High	3.01727	0
527	Q9CR23	Transmembrane protein 9 OS=Mus musculus GN=Tmem9 PE=2 SV=1 - [TMEM9_MOUSE]	nISGHIYnQnVSQK	N1(Deamidated)	1602.79	0	0.0002077	High	2.69774	High	3.48492	High	3.38226	0
528	Q9CR89-2	Isoform 2 of Endoplasmic reticulum-Golgi intermediate compartment protein 2 OS=Mus musculus GN=Ergic2 - [ERGI2_MOUSE]	GHAHLAALVnHDSYnFSHR	N15(Deamidated)	2147.02	0	4.014e-09					High	3.22664	0
529	Q9CRA0	Ecto-ADP-ribosyltransferase 4 OS=Mus musculus GN=Art4 PE=2 SV=1 - [NAR4_MOUSE]	SAGnMSTYnCQLLK	N4(Deamidated); M5(Oxidation); C10(Carbamidomethyl)	1603.71	0	1.262e-05	High	2.90554					0
530	Q9CY50	Translocon-associated protein subunit alpha OS=Mus musculus GN=Ssr1 PE=1 SV=1 - [SSRA_MOUSE]	DLnGnVFQDAVFnQTVTVIER	N5(Deamidated); N13(Deamidated)	2381.18	0	1.68e-16	High	5.53089	High	5.18296	High	5.6004	0
			YPQDYQFYIQnFTALPLnTVVPPQR	N11(Deamidated); N18(Deamidated)	3014.52	0	1.147e-13			High	4.45865	High	5.56005	0
531	Q9CYA0	Cysteine-rich with EGF-like domain protein 2 OS=Mus musculus GN=Creld2 PE=2 SV=1 - [CREL2_MOUSE]	nETHSICSACDESCK	N1(Deamidated); C7(Carbamidomethyl); C10(Carbamidomethyl); C14(Carbamidomethyl)	1798.68	0	6.872e-08	High	4.11671	High	4.87588	High	4.77825	0
532	Q9CYD3	Cartilage-associated protein OS=Mus musculus GN=Crtap PE=2 SV=3 - [CRTAP_MOUSE]	nCSAATPAPAPAGPASHAELR	N1(Deamidated); C2(Carbamidomethyl)	2046.97	0.001	0.01128	High	1.69676	High	2.7622			0
533	Q9CZR2	N-acetylated-alpha-linked acidic dipeptidase 2 OS=Mus musculus GN=Naalad2 PE=1 SV=2 - [NALD2_MOUSE]	nYAASIFnISK	N8(Deamidated)	1228.63	0	0.0008397	High	2.74909	High	2.52175	High	2.81703	0
			GSLnVSYnIGPGFTGSEYSR	N4(Deamidated)	2105.99	0	1.037e-07	High	2.78822	High	4.0447	High	3.9904	0
			SIAYInSDSAIEGnYTLR	N14(Deamidated)	1987.97	0	0.007191	High	3.2776					0
534	Q9CZT5	Vasorin OS=Mus musculus GN=Vasn PE=2 SV=2 - [VASN_MOUSE]	TPEGEEACGEAnTSQAVR	C8(Carbamidomethyl); N12(Deamidated)	1906.81	0	1.478e-05	High	2.2795	High	3.90262			0
			LHEISnETFR	N6(Deamidated)	1246.61	0	0.00178			High	2.54715	High	2.66341	0
535	Q9D136	2-oxoglutarate and iron-dependent oxygenase domain-containing protein 3 OS=Mus musculus GN=Ogfod3 PE=2 SV=1 - [OGFD3_MOUSE]	FVFMEEGSnK(T)	M4(Oxidation); N9(Deamidated)	1204.52	0.001	0.007444	High	1.28457	High	1.89456	High	1.89136	0
536	Q9D1H9	Microfibril-associated glycoprotein 4 OS=Mus musculus GN=Mfap4 PE=1 SV=1 - [MFAP4_MOUSE]	VDLEDFEnnTAYAK	N8(Deamidated)	1629.73	0	0.001147	High	3.69836	High	3.70074	High	4.20843	0
			FnGSVSFFR	N2(Deamidated)	1061.51	0	0.0183	High	2.97431	High	2.60975	High	2.92164	0
537	Q9D3L0	Membrane protein FAM174A OS=Mus musculus GN=Fam174a PE=2 SV=2 - [F174A_MOUSE]	GQAQSDAAGLPGAESRnDSIPGAGSEADGLEGK	N17(Deamidated)	3113.44	0	0.001992	High	2.36601	High	2.95708			1
538	Q9D586	Ciliary neurotrophic factor receptor subunit alpha OS=Mus musculus GN=Cntfr PE=2 SV=1 - [Q9D586_MOUSE]	VnGTDLAPDLLnGSQLILR	N2(Deamidated); N12(Deamidated)	2011.09	0	0.0003097	High	4.93896	High	4.6232	High	4.54841	0
539	Q9D7N9	Adipocyte plasma membrane-associated protein OS=Mus musculus GN=Apmap PE=1 SV=1 - [APMAP_MOUSE]	AGPnGTLFVVDAYK	N4(Deamidated)	1452.74	0	1.012e-06	High	4.21815	High	3.48716	High	4.15788	0
540	Q9D8C2	Tetraspanin-13 OS=Mus musculus GN=Tspan13 PE=2 SV=1 - [TSN13_MOUSE]	SYnPnDTCPASCAK	N5(Deamidated); C8(Carbamidomethyl); C12(Carbamidomethyl)	1585.63	0	0.001913			High	2.2109			0
541	Q9DA75	Sodium-dependent lysophosphatidylcholine symporter 1 OS=Mus musculus GN=Mfsd2a PE=1 SV=1 - [NLS1_MOUSE]	APCLQDQnGSVVVSEVAnR	C3(Carbamidomethyl); N8(Deamidated); N18(Deamidated)	2044.97	0	0.0003468	High	5.4391	High	4.50001			0
542	Q9DAC2	Complement component 8, gamma subunit, isoform CRA_b OS=Mus musculus GN=C8g PE=2 SV=1 - [Q9DAC2_MOUSE]	EAnLTEDQILFFPK	N3(Deamidated)	1665.84	0	4.096e-06	High	3.72089	High	4.06666	High	3.65292	0
			SLPVnDSVLDVFER	N5(Deamidated)	1590.8	0	1.017e-05			High	2.66819			0
543	Q9DAW9	Calponin-3 OS=Mus musculus GN=Cnn3 PE=1 SV=1 - [CNN3_MOUSE]	LTLQPVDnSTISLQMGTnK	N8(Deamidated); M15(Oxidation)	2077.06	0	2.246e-06	High	3.96754	High	3.42362	High	3.61049	0
544	Q9DBB9	Carboxypeptidase N subunit 2 OS=Mus musculus GN=Cpn2 PE=1 SV=2 - [CPN2_MOUSE]	LSLDSnnLTALHPALFHnLSR	N7(Deamidated); N18(Deamidated)	2335.21	0	1.53e-08	High	3.79374	High	3.76249	High	4.47756	0
			LQDLEITGSPVSnLSAHIFSnLSSLEK	N13(Deamidated)	2900.51	0	1.149e-07			High	4.66768	High	4.58186	0
			LSLDSnnLTALHPALFHnLSR	N6(Deamidated)	2334.23	0	1.685e-10					High	3.95459	0
			LQDLEITGSPVSnLSAHIFSnLSSLEK	N13(Deamidated); N21(Deamidated)	2901.48	0	6.479e-05					High	4.06987	0
			LQDLEITGSPVSnLSAHIFSnLSSLEK	Q2(Deamidated); N13(Deamidated); N21(Deamidated)	2902.48	0.001	0.001071					High	3.59657	0
			AFSGSPnLTK	N7(Deamidated)	1022.52	0.003	0.03467					High	1.68655	0
545	Q9DBG6	Dolichyl-diphosphooligosaccharide--protein glycosyltransferase subunit 2 OS=Mus musculus GN=Rpn2 PE=2 SV=1 - [RPN2_MOUSE]	SnLDPSnVDSLFYAAQSSQVLSGCEISVSnETK	C24(Carbamidomethyl); N30(Deamidated)	3547.65	0	0.004238	High	2.01329	High	2.94961	High	2.78684	0
546	Q9DBH5	Vesicular integral-membrane protein VIP36 OS=Mus musculus GN=Lman2 PE=2 SV=2 - [LMAN2_MOUSE]	VFPYISVMVnnGSLSYDHSK	M8(Oxidation); N11(Deamidated)	2274.09	0	0.001284	High	3.77182	High	4.50517	High	4.57268	0
547	Q9DBI0-3	Isoform 3 of Transmembrane protease serine 6 OS=Mus musculus GN=Tmprss6 - [TMPS6_MOUSE]	SVAFQDCQVnLTLEGR	C7(Carbamidomethyl); N10(Deamidated)	1837.88	0	0.0005837	High	4.49225	High	3.75857	High	3.93814	0
			ELLVDELLSnSSTLASYK	N10(Deamidated)	1983.03	0	1.833e-11			High	6.07715	High	5.77857	0
548	Q9DBN1	Protein Stra6l OS=Mus musculus GN=Stra6l PE=2 SV=1 - [Q9DBN1_MOUSE]	QInITCDnPVDR	N3(Deamidated); C6(Carbamidomethyl)	1445.67	0	0.01957	High	2.86258			High	2.01782	0
549	Q9DC42	CD97 antigen OS=Mus musculus GN=Cd97 PE=2 SV=1 - [Q9DC42_MOUSE]	DFnPATVnYTIQK	N8(Deamidated)	1511.74	0	2.559e-05	High	3.01792	High	3.33142			0
			LASnVTFK	N4(Deamidated)	880.479	0.004	0.04811					High	1.69129	0
550	Q9EPK6	Nucleotide exchange factor SIL1 OS=Mus musculus GN=Sil1 PE=1 SV=2 - [SIL1_MOUSE]	FnSSSSSLEEK	N2(Deamidated)	1215.54	0	0.06516	High	2.81403	High	2.75838	High	1.97857	0
551	Q9EPT5	Solute carrier organic anion transporter family member 2A1 OS=Mus musculus GN=Slco2a1 PE=1 SV=2 - [SO2A1_MOUSE]	QPIYLnCSCVTGGSASAK	N6(Deamidated); C7(Carbamidomethyl); C9(Carbamidomethyl)	1913.88	0	0.000248	High	3.52231	High	1.80636	High	2.54339	0
552	Q9EQH2	Endoplasmic reticulum aminopeptidase 1 OS=Mus musculus GN=Erap1 PE=2 SV=2 - [ERAP1_MOUSE]	CFnAMEVDALnSSHPVSTPVEnPAQIR	C1(Carbamidomethyl); N3(Deamidated); M5(Oxidation); N11(Deamidated)	3001.38	0	4.757e-06	High	3.93749	High	3.33915	High	3.10011	0
			CFnAMEVDALnSSHPVSTPVEnPAQIR	C1(Carbamidomethyl); M5(Oxidation); N11(Deamidated)	3000.4	0	4.907e-11	High	3.24866	High	4.16395	High	5.10441	0
			CFnAMEVDALnSSHPVSTPVEnPAQIR	C1(Carbamidomethyl); N11(Deamidated)	2984.4	0	0.006006	High	4.50762			High	4.31391	0
553	Q9EQJ0	Two pore calcium channel protein 1 OS=Mus musculus GN=Tpcn1 PE=2 SV=1 - [TPC1_MOUSE]	LTPnCCnTSTVADAYR	C5(Carbamidomethyl); C6(Carbamidomethyl); N7(Deamidated)	1843.8	0	2.27e-08	High	2.33454	High	3.24892	High	3.6339	0
			FInHTVGnK	N3(Deamidated); N8(Deamidated)	1031.52	0	0.04659	High	2.34046					0
554	Q9ESB3	Histidine-rich glycoprotein OS=Mus musculus GN=Hrg PE=1 SV=2 - [HRG_MOUSE]	YSnESQDLSVnGYnCTTSSVSSALR	Q6(Deamidated); N14(Deamidated); C15(Carbamidomethyl)	2741.2	0	0.0001503	High	4.8947	High	4.59286	High	4.73462	0
			YSnESQDLSVnGYnCTTSSVSSALR	Q6(Deamidated); N11(Deamidated); N14(Deamidated); C15(Carbamidomethyl)	2742.18	0	6.565e-07	High	4.71562	High	5.2374	High	4.59287	0
			LQEGALPQLPPGYPPHSGAnR(T)	N20(Deamidated)	2200.12	0	6.725e-06	High	4.1747	High	4.04234	High	4.12178	0
			nCSTQHFPR	N1(Deamidated); C2(Carbamidomethyl)	1147.5	0	0.0009929	High	2.83494	High	3.24825	High	3.10935	0
			LPPLnIGEVLTLPEAnFPSFSLPnCnR(S)	N24(Deamidated); C25(Carbamidomethyl)	3010.56	0	9.792e-08			High	4.83602	High	4.62616	0
			nCSTQHFPR	N1(Deamidated); C2(Carbamidomethyl); Q5(Deamidated)	1148.48	0.006	0.1211			High	1.95293			0
555	Q9ET22	Dipeptidyl peptidase 2 OS=Mus musculus GN=Dpp7 PE=2 SV=2 - [DPP2_MOUSE]	ALAGLVYnSSGTEPCYDIYR	N8(Deamidated); C15(Carbamidomethyl)	2250.05	0	6.715e-07	High	4.35696	High	4.58782	High	4.38895	0
556	Q9ET30	Transmembrane 9 superfamily member 3 OS=Mus musculus GN=Tm9sf3 PE=1 SV=1 - [TM9S3_MOUSE]	IVDVnLTSEGK	N5(Deamidated)	1175.62	0	0.0008353	High	3.32172	High	3.34437	High	3.25277	0
557	Q9JHE3	Neutral ceramidase OS=Mus musculus GN=Asah2 PE=1 SV=1 - [ASAH2_MOUSE]	AIATDTVAnMSSGPEPPFFK	N9(Deamidated); M10(Oxidation)	2096.99	0	1.907e-09	High	3.24679	High	3.26253	High	4.61458	0
			nFSGYYIGVGR	N1(Deamidated)	1233.59	0	0.0004566					High	3.27364	0
558	Q9JHJ3	Glycosylated lysosomal membrane protein OS=Mus musculus GN=Glmp PE=1 SV=1 - [GLMP_MOUSE]	LLEFDSTnASEGAQPPGKPYPPYSLAK	N8(Deamidated)	2878.43	0	0.0007291	High	3.82371	High	4.00842	High	3.82962	0
			GnHSLFGLEVATLGQGPDCPSVnER	N2(Deamidated); C19(Carbamidomethyl)	2655.26	0	2.621e-18	High	4.61282	High	4.92456	High	5.30631	0
559	Q9JIS8	Solute carrier family 12 member 4 OS=Mus musculus GN=Slc12a4 PE=1 SV=2 - [S12A4_MOUSE]	TVVVDnETVATR	N6(Deamidated)	1304.67	0	0.001071	High	2.16628	High	2.36937	High	2.81648	0
560	Q9JJF9	Signal peptide peptidase-like 2A OS=Mus musculus GN=Sppl2a PE=1 SV=2 - [SPP2A_MOUSE]	IAQEGGAAALLIAnnSVLIPSSR	N14(Deamidated)	2266.26	0	0.001071	High	2.1731	High	2.81394	High	2.84878	0
			LPSSLEnATSLSLMnLTGTALCHLSDIPPDGIR	N7(Deamidated); M14(Oxidation); N15(Deamidated); C22(Carbamidomethyl)	3511.76	0	3.198e-10			High	4.69571	High	4.84732	0
			STFQnVTVLIAVITQK	N5(Deamidated)	1763.01	0	0.001049					High	4.38955	0
561	Q9JJL3	Solute carrier organic anion transporter family member 1B2 OS=Mus musculus GN=Slco1b2 PE=1 SV=1 - [SO1B2_MOUSE]	YATEnDISSLHnSTLTCLVnQTTSLTGTSPEIMEK	N5(Deamidated); N12(Deamidated); C17(Carbamidomethyl); N20(Deamidated); M33(Oxidation)	3874.81	0	0.001071	High	3.16944	High	2.63149	High	3.77444	0
			YATEnDISSLHnSTLTCLVnQTTSLTGTSPEIMEK	N12(Deamidated); C17(Carbamidomethyl); N20(Deamidated); M33(Oxidation)	3873.8	0	5.743e-07	High	3.92162	High	4.15919	High	3.51625	0
			YATEnDISSLHnSTLTCLVnQTTSLTGTSPEIMEK	N12(Deamidated); C17(Carbamidomethyl); N20(Deamidated)	3857.82	0	0.004834	High	3.63296	High	3.10972			0
			YATEnDISSLHnSTLTCLVnQTTSLTGTSPEIMEK	N5(Deamidated); N12(Deamidated); C17(Carbamidomethyl); N20(Deamidated)	3858.8	0.009	0.2321	High	1.86376					0
562	Q9JJN5	Carboxypeptidase N catalytic chain OS=Mus musculus GN=Cpn1 PE=2 SV=1 - [CBPN_MOUSE]	IHILPSMnPDGYEVAAAQGPnMSGYLVGR	M7(Oxidation); N21(Deamidated); M22(Oxidation)	3090.49	0	8.436e-05			High	3.88419			0
563	Q9JKF6	Nectin-1 OS=Mus musculus GN=Pvrl1 PE=1 SV=3 - [PVRL1_MOUSE]	SGQVEVnITEFPYTPTPEHGR	N7(Deamidated)	2359.13	0	5.102e-05	High	3.91527	High	4.00663	High	4.19245	0
			nPnGTVTVISR	N3(Deamidated)	1158.61	0	0.0002463	High	2.76417	High	3.37848	High	2.99389	0
			LKGEAEYQEIRnPnGTVTVISR	N14(Deamidated)	2475.29	0.001	0.004393			High	3.29425	High	2.5501	2
564	Q9JKR6	Hypoxia up-regulated protein 1 OS=Mus musculus GN=Hyou1 PE=1 SV=1 - [HYOU1_MOUSE]	LSALDnLLnHSSIFLK	N9(Deamidated)	1785.98	0	1.671e-09	High	4.89018	High	4.78789	High	4.79264	0
			AEPPLnASAGDQEEK	N6(Deamidated)	1556.71	0	4.096e-05	High	3.46145	High	3.50585	High	3.20802	0
			VFGSQnLTTVK	N6(Deamidated)	1194.64	0	0.0004361	High	3.35352	High	3.65473	High	3.58976	0
			EnGTDAVQEEEESPAEGSK	N2(Deamidated)	2006.83	0	8.621e-11	High	4.84671	High	4.55919	High	4.26752	0
			FQISPQLQFSPEEVLGMVLnYSR	M17(Oxidation); N20(Deamidated)	2699.36	0	3.293e-13	High	4.59308	High	4.53022	High	4.95414	0
			VFGSQnLTTVK	Q5(Deamidated); N6(Deamidated)	1195.62	0	0.002159	High	2.06849	High	2.12902			0
			AEPPLnASAGDQEEK	N6(Deamidated); Q12(Deamidated)	1557.69	0.001	0.01617	High	2.37476	High	2.46638			0
			LGnTISSLFGGGTSSDAKEnGTDAVQEEEESPAEGSK	N3(Deamidated); N20(Deamidated); Q26(Deamidated)	3701.66	0.001	0.005842			High	2.82634			1
			LGnTISSLFGGGTSSDAKEnGTDAVQEEEESPAEGSK	N3(Deamidated); N20(Deamidated)	3700.68	0	1.226e-05			High	3.67724			1
			nATLAEQAK	N1(Deamidated)	946.487	0.004	0.06202					High	2.39615	0
565	Q9JL99-2	Isoform 2 of C-type lectin domain family 1 member B OS=Mus musculus GN=Clec1b - [CLC1B_MOUSE]	QYCTEQnATLVK	C3(Carbamidomethyl); N7(Deamidated)	1455.69	0	0.0008353					High	3.53708	0
566	Q9QWR8	Alpha-N-acetylgalactosaminidase OS=Mus musculus GN=Naga PE=2 SV=2 - [NAGAB_MOUSE]	VnYTEVSR	N2(Deamidated)	968.471	0.001	0.005228	High	2.49964	High	2.2401	High	1.86989	0
567	Q9QXC1	Fetuin-B OS=Mus musculus GN=Fetub PE=1 SV=1 - [FETUB_MOUSE]	VLYLPAYnCTLRPVSK	N8(Deamidated); C9(Carbamidomethyl)	1895.02	0	0.004198	High	3.07902					0
568	Q9QYC7	Vitamin K-dependent gamma-carboxylase OS=Mus musculus GN=Ggcx PE=2 SV=1 - [VKGC_MOUSE]	EKVEnGSETGPLPPELQPLLEGEVK	N5(Deamidated)	2690.39	0	1.99e-07	High	3.24317	High	4.15344	High	3.61062	1
			VEnGSETGPLPPELQPLLEGEVK	N3(Deamidated)	2433.26	0	3.692e-13	High	4.27396	High	4.36847	High	5.05104	0
569	Q9QZ25	Vascular non-inflammatory molecule 3 OS=Mus musculus GN=Vnn3 PE=1 SV=3 - [VNN3_MOUSE]	LTGSAGnYTVCQK	N7(Deamidated); C11(Carbamidomethyl)	1399.65	0	0.00652	High	3.62149	High	1.81007	High	2.8978	0
			KPCnATDPHCPPDGR	C3(Carbamidomethyl); N4(Deamidated); C10(Carbamidomethyl)	1722.74	0	0.0004024					High	2.3973	0
570	Q9QZC2	Plexin-C1 OS=Mus musculus GN=Plxnc1 PE=1 SV=1 - [PLXC1_MOUSE]	nGTEVVSCHPQGSTAGVVYR	N1(Deamidated); C8(Carbamidomethyl)	2118.99	0	1.181e-07	High	2.34105	High	3.65762	High	2.90649	0
			FnFTnCASLK	N2(Deamidated); C6(Carbamidomethyl)	1202.55	0	0.05136	High	2.35441	High	2.12556			0
			VVLGEnLTSnCPEVIYEIK	N6(Deamidated); C11(Carbamidomethyl)	2178.11	0	0.003691	High	4.18094					0
571	Q9R013	Cathepsin F OS=Mus musculus GN=Ctsf PE=2 SV=1 - [CATF_MOUSE]	VYInDSVELSR	N4(Deamidated)	1295.65	0	0.0002082	High	2.93967	High	2.78033	High	3.13981	0
			nATFSSFLPLLDKDPLPQDFSVK	N1(Deamidated)	2580.34	0.001	0.003253					High	2.62981	1
572	Q9R069	Basal cell adhesion molecule OS=Mus musculus GN=Bcam PE=2 SV=1 - [BCAM_MOUSE]	nQSGIYGCR	N1(Deamidated); C8(Carbamidomethyl)	1055.46	0	0.0008353			High	2.33874	High	2.70263	0
573	Q9R098	Hepatocyte growth factor activator OS=Mus musculus GN=Hgfac PE=1 SV=1 - [HGFA_MOUSE]	FCnIVPTEHCFLGnGTEYR	C2(Carbamidomethyl); C10(Carbamidomethyl); N14(Deamidated)	2315.03	0	0.009556	High	2.87125					0
574	Q9R0E1	Procollagen-lysine,2-oxoglutarate 5-dioxygenase 3 OS=Mus musculus GN=Plod3 PE=1 SV=1 - [PLOD3_MOUSE]	FLQSAEFFnYTVR	N9(Deamidated)	1622.8	0	0.004288	High	3.26951					0
575	Q9R0E2	Procollagen-lysine,2-oxoglutarate 5-dioxygenase 1 OS=Mus musculus GN=Plod1 PE=1 SV=1 - [PLOD1_MOUSE]	YIHEnYTK	N5(Deamidated)	1068.5	0.006	0.1051	High	2.44825			High	1.89096	0
			EQInISLDHR	N4(Deamidated)	1225.62	0	0.0008353	High	2.24222					0
576	Q9R182	Angiopoietin-related protein 3 OS=Mus musculus GN=Angptl3 PE=2 SV=1 - [ANGL3_MOUSE]	nEEVKnMSVELnSK	N6(Deamidated); M7(Oxidation)	1637.77	0	0.0002827	High	3.30235	High	3.37687	High	2.8342	1
			TTPPLQLnETEnTEQDDLPADCSAVYnR	N8(Deamidated); C22(Carbamidomethyl)	3192.43	0	1.32e-05			High	2.85152			0
577	Q9WTR5	Cadherin-13 OS=Mus musculus GN=Cdh13 PE=1 SV=2 - [CAD13_MOUSE]	InnTHALVSLLQnLnK	N2(Deamidated)	1793	0	1.719e-06	High	3.04845	High	3.62848	High	3.56145	0
578	Q9WU60	Attractin OS=Mus musculus GN=Atrn PE=2 SV=3 - [ATRN_MOUSE]	IDSTGnVTnELR	N6(Deamidated)	1319.65	0	8.155e-07	High	3.69072	High	4.00442	High	3.23459	0
			GICnASDTR	C3(Carbamidomethyl); N4(Deamidated)	994.428	0	0.0008353			High	2.7511	High	2.9733	0
			CInQSICEK	C1(Carbamidomethyl); N3(Deamidated); C7(Carbamidomethyl)	1152.5	0.001	0.08272	High	2.31229					0
			AATCInPLnGSVCERPAnHSAK	C4(Carbamidomethyl); N9(Deamidated); C13(Carbamidomethyl); N18(Deamidated)	2369.1	0	0.001427					High	2.89513	0
579	Q9WUH7	Semaphorin-4G OS=Mus musculus GN=Sema4g PE=1 SV=1 - [SEM4G_MOUSE]	GQTQnYSTLLLEEASER	N5(Deamidated)	1939.93	0	9.303e-05	High	4.23375	High	5.13199	High	4.91317	0
			GKnnQTECFnHVR	N4(Deamidated); C8(Carbamidomethyl)	1604.73	0	0.0007653	High	2.10924	High	2.63267	High	3.6349	1
			GYnSSQDLPSLVLDFVK	N3(Deamidated)	1882.96	0	2.409e-13	High	5.40013	High	4.55045	High	5.91709	0
			nnQTECFnHVR	N2(Deamidated); C6(Carbamidomethyl)	1419.61	0	0.0009207	High	2.93271	High	2.91225			0
580	Q9WUZ9	Ectonucleoside triphosphate diphosphohydrolase 5 OS=Mus musculus GN=Entpd5 PE=1 SV=1 - [ENTP5_MOUSE]	GYLTSFEMFnSTFK	M8(Oxidation); N10(Deamidated)	1688.77	0	1.573e-06	High	4.20856	High	4.25066	High	3.72834	0
			GYLTSFEMFnSTFK	N10(Deamidated)	1672.76	0	0.0009358	High	3.68277					0
581	Q9WV54	Acid ceramidase OS=Mus musculus GN=Asah1 PE=1 SV=1 - [ASAH1_MOUSE]	SVLEnTTSYEEAK	N5(Deamidated)	1471.69	0	7.23e-05	High	3.68425	High	4.04412	High	3.73983	0
			nLSFATIYDVLSTKPVLnK	N1(Deamidated)	2124.17	0	8.439e-17	High	2.61863	High	4.9564	High	5.0724	0
582	Q9WV91	Prostaglandin F2 receptor negative regulator OS=Mus musculus GN=Ptgfrn PE=1 SV=2 - [FPRP_MOUSE]	EAATSLSnPIEIDFQTSGPTFnASVHSDTPSVTR	N22(Deamidated)	3577.71	0.001	0.01958	High	2.30231	High	2.56261			0
			YSVLITAEKPVGDLSSPnETK	N18(Deamidated)	2249.16	0	0.01414	High	2.9586	High	2.76428			0
583	Q9WVD4	H(+)/Cl(-) exchange transporter 5 OS=Mus musculus GN=Clcn5 PE=2 SV=1 - [CLCN5_MOUSE]	LCDYEnHFnTSK	C2(Carbamidomethyl); N9(Deamidated)	1528.64	0	0.0001835	High	2.65873	High	3.31655	High	2.94143	0
584	Q9WVF5	Epidermal growth factor receptor OS=Mus musculus GN=Egfr PE=2 SV=1 - [Q9WVF5_MOUSE]	DTLSInATnIK	N6(Deamidated)	1190.63	0	0.00761	High	3.47368	High	2.82386	High	2.85956	0
			EFVEnSECIQCHPECLPQAMnITCTGR	C8(Carbamidomethyl); C11(Carbamidomethyl); C15(Carbamidomethyl); M20(Oxidation); N21(Deamidated); C24(Carbamidomethyl)	3297.38	0	1.894e-08	High	2.68065	High	4.19652	High	2.02609	0
			DCVSCQnVSR	C2(Carbamidomethyl); C5(Carbamidomethyl); N7(Deamidated)	1225.5	0	0.0003994	High	3.00162	High	2.9161	High	2.75867	0
			GnALYEnTYALAILSnYGTnR(T)	N20(Deamidated)	2319.14	0	3.22e-07			High	4.89793	High	5.16062	0
			EFVEnSECIQCHPECLPQAMnITCTGR	C8(Carbamidomethyl); C11(Carbamidomethyl); C15(Carbamidomethyl); N21(Deamidated); C24(Carbamidomethyl)	3281.37	0	0.02911	High	3.05293					0
			TCPAGIMGEnnTLVWK	C2(Carbamidomethyl); M7(Oxidation); N10(Deamidated)	1807.84	0	0.0621	High	3.16937					0
585	Q9WVJ3-2	Isoform 2 of Carboxypeptidase Q OS=Mus musculus GN=Cpq - [CBPQ_MOUSE]	EVMnLLQPLnVTK	M3(Oxidation); N10(Deamidated)	1515.82	0	7.28e-05	High	3.78964	High	3.63304	High	3.75443	0
			EVMnLLQPLnVTK	N10(Deamidated)	1499.82	0	0.002695	High	3.41001					0
			TAFAPPDIPVCLLGnR(T)	C11(Carbamidomethyl); N15(Deamidated)	1741.9	0	0.0008353	High	2.71751	High	2.46568	High	3.18801	0
586	Q9WVT6	Carbonic anhydrase 14 OS=Mus musculus GN=Ca14 PE=1 SV=1 - [CAH14_MOUSE]	YnGSLTTPPCYQSVLWTVFnR	N2(Deamidated); C10(Carbamidomethyl)	2504.21	0	0.0001208			High	3.13603	High	3.89697	0
587	Q9Z0F8-2	Isoform Short of Disintegrin and metalloproteinase domain-containing protein 17 OS=Mus musculus GN=Adam17 - [ADA17_MOUSE]	VDEGEECDPGIMYLnnDTCCnSDCTLKPGVQCSDR	C7(Carbamidomethyl); M12(Oxidation); N15(Deamidated); C19(Carbamidomethyl); C20(Carbamidomethyl); C24(Carbamidomethyl); C32(Carbamidomethyl)	4125.64	0.009	0.1513			High	1.36804			0
			nLSGPCVPYVDAEQK	N1(Deamidated); C6(Carbamidomethyl)	1677.78	0.001	0.005125					High	2.93096	0
588	Q9Z0K8	Pantetheinase OS=Mus musculus GN=Vnn1 PE=1 SV=3 - [VNN1_MOUSE]	nnSIYVVAnMGDK	N1(Deamidated); M10(Oxidation)	1441.67	0	7.431e-07	High	2.92133	High	3.76761	High	3.22738	0
			KPCnTSDSHCPPDGR	C3(Carbamidomethyl); N4(Deamidated); C10(Carbamidomethyl)	1728.72	0	6.135e-07	High	3.14835	High	3.99776	High	3.90235	0
			nnSIYVVAnMGDK	N1(Deamidated)	1425.67	0	0.008393	High	3.12057					0
			SHPIHSPVnWTSYASSVESTPTK	N9(Deamidated)	2513.2	0	0.000481					High	2.58216	0
589	Q9Z0L8-2	Isoform II of Gamma-glutamyl hydrolase OS=Mus musculus GN=Ggh - [GGH_MOUSE]	KLPLnFTEGAR	N5(Deamidated)	1246.68	0	0.03062	High	2.59615	High	2.39868	High	2.70994	1
			SInGVLLPGGGAnLTDSGYSR	N3(Deamidated); N13(Deamidated)	2050.01	0	7.907e-05	High	2.75587	High	2.72935	High	2.58347	0
			SInGVLLPGGGAnLTDSGYSR	N13(Deamidated)	2049.03	0	0.0005018	High	3.7842	High	2.34602	High	3.1469	0
			LPLnFTEGAR	N4(Deamidated)	1118.59	0	0.06375	High	2.63151	High	2.50445			0
590	Q9Z0M5	Lysosomal acid lipase/cholesteryl ester hydrolase OS=Mus musculus GN=Lipa PE=2 SV=2 - [LICH_MOUSE]	nYFHYnQSFPPSYnIK	N6(Deamidated)	2019.93	0	2.231e-08	High	4.90574	High	4.86242	High	4.9017	0
			YDLPASInYILnK(T)	N12(Deamidated)	1524.8	0	0.0009948	High	4.77179	High	4.58465	High	4.25502	0
591	Q9Z247	Peptidyl-prolyl cis-trans isomerase FKBP9 OS=Mus musculus GN=Fkbp9 PE=1 SV=1 - [FKBP9_MOUSE]	YHYnGTLLDGTLFDSSYSR	N4(Deamidated)	2210.02	0	0.0001967	High	2.94291	High	3.84592	High	2.0713	0
592	Q9Z2A9-2	Isoform 2 of Gamma-glutamyltransferase 5 OS=Mus musculus GN=Ggt5 - [GGT5_MOUSE]	QLFFnGTETLR	N5(Deamidated)	1326.67	0	0.002638	High	2.10172	High	1.89493	High	2.1706	0
			GDHHQLSHYnLTGVR	N10(Deamidated)	1734.83	0	7.496e-11	High	3.85896	High	3.93826	High	4.33226	0
593	Q9Z2L6	Multiple inositol polyphosphate phosphatase 1 OS=Mus musculus GN=Minpp1 PE=1 SV=3 - [MINP1_MOUSE]	FLTDVERnETALYHVEAFK	N8(Deamidated)	2283.15	0	0.002538	High	2.27588	High	2.95995			1
594	Q9Z329-2	Isoform 2 of Inositol 1,4,5-trisphosphate receptor type 2 OS=Mus musculus GN=Itpr2 - [ITPR2_MOUSE]	EnCSPTIPSSnTAGEEGEDGIER	N2(Deamidated); C3(Carbamidomethyl)	2450.03	0	1.875e-07	High	1.62186	High	2.42491			0
595	S4R1M0	Protein-tyrosine-phosphatase OS=Mus musculus GN=Ptprc PE=1 SV=1 - [S4R1M0_MOUSE]	TSRPTDnSInVTCGPPYETnGPK	N10(Deamidated); C13(Carbamidomethyl)	2506.16	0	1.023e-06	High	3.18191	High	3.73401	High	3.42108	0
			TSRPTDnSInVTCGPPYETnGPK	N10(Deamidated); C13(Carbamidomethyl); N20(Deamidated)	2507.13	0	0.0001113	High	2.1725	High	3.75768			0
			SLPnnVTSFEVESLKPYK	N5(Deamidated)	2053.05	0	3.204e-10			High	4.40987	High	3.98984	0
596	V9GX00	Interleukin-6 receptor subunit beta OS=Mus musculus GN=Il6st PE=1 SV=1 - [V9GX00_MOUSE]	VKPTPPYnLSVTnSEELSSILK	N8(Deamidated)	2417.3	0	0.0005869	High	4.03991	High	3.63206	High	3.87337	0
			EQVTVInR(T)	N7(Deamidated)	959.517	0.002	0.03206	High	1.95081	High	1.49812	High	1.46008	0
			ETYLETnYTLK	N7(Deamidated)	1375.67	0	0.03482	High	2.68431	High	2.58663	High	2.26928	0
			GSnFTAICVLK	N3(Deamidated); C8(Carbamidomethyl)	1210.62	0	0.0006207	High	3.04234	High	3.27318	High	3.05108	0
			nYSISYR	N1(Deamidated)	903.42	0.007	0.1327					High	1.56586	0
597	Z4YLN2	Alpha-N-acetylgalactosaminide alpha-2,6-sialyltransferase 6 (Fragment) OS=Mus musculus GN=St6galnac6 PE=4 SV=1 - [Z4YLN2_MOUSE]	KPQEFVnR(T)	N7(Deamidated)	1018.53	0.002	0.03743	High	1.91343	High	2.02938			0
			MnDAPTSGYSADVGnK(T)	M1(Oxidation); N15(Deamidated)	1643.69	0	2.183e-06			High	3.15078	High	2.97926	0
									1015		1074		1002	3091

## Sheet: Sheet2
Protein Group Accessions	L1	L2	L3		#N/A	#N/A
A0A075B5P4	High	High	High		High	High
A0A075B6A3	High	High	High		High	High
A0A075B6A3	High	High	High		High	High
A0A087WNL6	High	High	High		High	High
A0A087WP12	High	High	High		High	High
A0A087WP12	High	High	High		High	High
A0A087WP12	High	High			High	#N/A
A0A0A6YVT1	High	High	High		High	High
A0A0A6YVT1	High	High	High		High	High
A0A0A6YVT1	High	High			High	#N/A
A0A0A6YWH7	High	High	High		High	High
A0A0A6YWH7	High	High	High		High	High
A0A0A6YWH7	High	High	High		High	High
A0A0A6YWK7	High	High	High		High	High
A0A0B4J1G0	High	High	High		High	High
A2A4I8	High	High	High		High	High
A2AAA9	High	High			High	#N/A
A2AIJ2	High	High	High		High	High
A2AIJ2	High	High	High		High	High
A2AKI5	High	High	High		High	High
A2AKI5	High	High	High		High	High
A2AKI5	High	High	High		High	High
A2AKI5	High	High	High		High	High
A2AMH3	High	High	High		High	High
A2AQ56	High	High	High		High	High
A2AS37	High	High	High		High	High
A2ATR8	High	High	High		High	High
A2AWF8	High	High	High		High	High
A2AWF8	High	High	High		High	High
A2AWF8	High	High	High		High	High
A2AWF8	High	High	High		High	High
A2BDV6	High	High	High		High	High
A6X935-2	High	High	High		High	High
A6X935-2	High	High	High		High	High
A9C437	High	High	High		High	High
B0R0N4	High	High			High	#N/A
B1AU41	High	High			High	#N/A
B1AW62	High	High	High		High	High
B1AZA8	High	High	High		High	High
B2RT14	High	High	High		High	High
B2RXS4	High	High	High		High	High
B2RXS4	High	High	High		High	High
B2RXS4	High	High	High		High	High
B2RXS4	High	High	High		High	High
B2RXS4	High	High	High		High	High
B2RXS4	High	High	High		High	High
B2RXS4	High	High	High		High	High
B2RXS4	High	High	High		High	High
B2RXS4	High	High			High	#N/A
B5THE2	High	High	High		High	High
B5THE2	High	High	High		High	High
B5THE2	High	High	High		High	High
B5THE2	High	High	High		High	High
B7ZNJ1	High	High	High		High	High
B7ZNJ1	High	High	High		High	High
B7ZNJ1	High	High	High		High	High
B7ZNJ1	High	High			High	#N/A
B7ZNP0	High	High	High		High	High
B8JJN2;F6VQX8	High	High			High	#N/A
B8JK39	High	High	High		High	High
B8JK39	High	High	High		High	High
D3YWD1	High	High			High	#N/A
D3YYN2	High	High	High		High	High
D3YYT0	High	High	High		High	High
D3Z2V4	High	High	High		High	High
D3Z2V4	High	High	High		High	High
D3Z354	High	High	High		High	High
D3Z354	High	High	High		High	High
D3Z4W4	High	High	High		High	High
D3Z5E7	High	High	High		High	High
D3Z5U5	High	High	High		High	High
D3Z5U5	High	High	High		High	High
D3Z5U5	High	High	High		High	High
D3Z5U5	High	High			High	#N/A
D3Z5Y0	High	High			High	#N/A
D3Z665	High	High	High		High	High
D6REF0	High	High	High		High	High
D6RGM8	High	High	High		High	High
D6RH54	High	High	High		High	High
E0CXC7	High	High	High		High	High
E0CXC7	High	High	High		High	High
E0CXN0	High	High	High		High	High
E0CYN0	High	High	High		High	High
E0CYN0	High	High			High	#N/A
E9PV38	High	High	High		High	High
E9PV38	High	High	High		High	High
E9PWD8	High	High	High		High	High
E9PWD8	High	High	High		High	High
E9PWK4	High	High	High		High	High
E9PWK4	High	High	High		High	High
E9PWK7	High	High	High		High	High
E9PWT4	High	High	High		High	High
E9PWV5	High	High	High		High	High
E9PXG1	High	High	High		High	High
E9PZ00	High	High	High		High	High
E9PZ00	High	High	High		High	High
E9PZ00	High	High	High		High	High
E9PZ00	High	High	High		High	High
E9Q0W2	High	High			High	#N/A
E9Q0W2	High	High	High		High	High
E9Q1Y3	High	High	High		High	High
E9Q1Y3	High	High	High		High	High
E9Q1Y3	High	High			High	#N/A
E9Q251	High	High	High		High	High
E9Q4G8	High	High	High		High	High
E9Q4G8	High	High	High		High	High
E9Q4G8	High	High	High		High	High
E9Q4G8	High	High	High		High	High
E9Q638	High	High	High		High	High
E9Q649	High	High			High	#N/A
E9Q6A6	High	High			High	#N/A
E9Q706	High	High	High		High	High
E9Q7R8	High	High	High		High	High
E9Q8H9	High	High	High		High	High
E9Q8H9	High	High	High		High	High
E9Q8H9	High	High	High		High	High
E9Q8H9	High	High			High	#N/A
E9Q8H9	High	High			High	#N/A
E9Q8N2	High	High			High	#N/A
E9Q8P6	High	High	High		High	High
E9QMY1	High	High			High	#N/A
E9QNL8	High	High	High		High	High
E9QNL8	High	High			High	#N/A
E9QNL8	High	High			High	#N/A
E9QNL8	High	High			High	#N/A
F2Z4A3	High	High	High		High	High
F2Z4A3	High	High			High	#N/A
F6QD87	High	High	High		High	High
F6QFB4	High	High			High	#N/A
F6RN19	High	High	High		High	High
F6S1X8	High	High	High		High	High
F6S1X8	High	High	High		High	High
F6S1X8	High	High			High	#N/A
F6UD16	High	High	High		High	High
F6Y6L6	High	High	High		High	High
F6Y6L6	High	High	High		High	High
F6ZXJ7	High	High	High		High	High
F7A1B4	High	High	High		High	High
F7A1B4	High	High	High		High	High
F7A4R2	High	High	High		High	High
F7AWS1	High	High			High	#N/A
F7BWT7	High	High	High		High	High
F7CIP8	High	High	High		High	High
F7CIP8	High	High	High		High	High
F8VQD7	High	High	High		High	High
G3UWE8	High	High	High		High	High
G3UWI7	High	High	High		High	High
G3UWJ5;P35330	High	High	High		High	High
G3UWJ5;P35330	High	High	High		High	High
G3UWR0	High	High	High		High	High
G3UXW2	High	High	High		High	High
G3UXW2	High	High			High	#N/A
G3UXW2;P01899	High	High	High		High	High
G3UXW2;P01899	High	High	High		High	High
G3UYI3	High	High	High		High	High
G3UZ14	High	High			High	#N/A
G3X8T9	High	High	High		High	High
G3X8Y8	High	High	High		High	High
G3X9D6	High	High			High	#N/A
G3X9Q1	High	High			High	#N/A
G3X9S2	High	High	High		High	High
G3X9S2	High	High	High		High	High
G3X9S2	High	High			High	#N/A
G3X9S2	High	High			High	#N/A
G3X9T8	High	High	High		High	High
G5E8Q8	High	High	High		High	High
G5E8Q8	High	High	High		High	High
G5E8Q8	High	High	High		High	High
H3BIX4	High	High	High		High	High
H3BIX4	High	High	High		High	High
H3BJH0	High	High	High		High	High
H3BL34	High	High	High		High	High
H3BL34	High	High	High		High	High
H3BLE9	High	High	High		High	High
H7BX99	High	High	High		High	High
H7BX99	High	High	High		High	High
J3QJX3	High	High	High		High	High
J3QJX3	High	High	High		High	High
J3QJX3	High	High	High		High	High
J3QN06	High	High	High		High	High
K4DI63	High	High	High		High	High
K4DI63	High	High	High		High	High
O08532-3	High	High			High	#N/A
O08692	High	High	High		High	High
O08705	High	High	High		High	High
O08795	High	High			High	#N/A
O09117-2	High	High	High		High	High
O09117-2	High	High	High		High	High
O09117-2	High	High	High		High	High
O09117-2	High	High			High	#N/A
O09159	High	High	High		High	High
O09159	High	High	High		High	High
O09164	High	High	High		High	High
O35114	High	High	High		High	High
O35114	High	High	High		High	High
O35114	High	High	High		High	High
O35114	High	High	High		High	High
O35405	High	High			High	#N/A
O35598	High	High	High		High	High
O35598	High	High			High	#N/A
O35604	High	High	High		High	High
O35604	High	High	High		High	High
O35604	High	High	High		High	High
O35604	High	High	High		High	High
O35604	High	High	High		High	High
O35604	High	High	High		High	High
O35607	High	High			High	#N/A
O35632	High	High	High		High	High
O35657	High	High	High		High	High
O54890	High	High	High		High	High
O54890	High	High			High	#N/A
O54965-2	High	High	High		High	High
O55026	High	High			High	#N/A
O55111	High	High	High		High	High
O70255	High	High	High		High	High
O70362	High	High	High		High	High
O70570	High	High	High		High	High
O70570	High	High	High		High	High
O70570	High	High			High	#N/A
O70577-2	High	High	High		High	High
O88325	High	High	High		High	High
O88325	High	High	High		High	High
O88531	High	High	High		High	High
O88783	High	High	High		High	High
O88792	High	High	High		High	High
O88792	High	High			High	#N/A
O88792	High	High			High	#N/A
O88829-2	High	High	High		High	High
O88829-2	High	High			High	#N/A
O88856	High	High	High		High	High
O89001	High	High	High		High	High
O89001	High	High	High		High	High
O89017	High	High	High		High	High
O89017	High	High			High	#N/A
O89020-2	High	High	High		High	High
O89023	High	High	High		High	High
O89023	High	High	High		High	High
P01029	High	High	High		High	High
P01029	High	High	High		High	High
P01029	High	High	High		High	High
P01831	High	High	High		High	High
P01863	High	High	High		High	High
P01868	High	High	High		High	High
P02469	High	High	High		High	High
P05555-2	High	High	High		High	High
P05555-2	High	High	High		High	High
P06339	High	High	High		High	High
P06683	High	High	High		High	High
P06797	High	High	High		High	High
P07759	High	High	High		High	High
P07759	High	High	High		High	High
P07759	High	High	High		High	High
P08071	High	High	High		High	High
P08101-2	High	High	High		High	High
P08101-2	High	High	High		High	High
P08101-2	High	High	High		High	High
P08101-2	High	High	High		High	High
P08101-2	High	High	High		High	High
P08113	High	High	High		High	High
P08113	High	High	High		High	High
P08113	High	High	High		High	High
P08113	High	High	High		High	High
P08113	High	High	High		High	High
P08607	High	High	High		High	High
P08607	High	High	High		High	High
P08607	High	High	High		High	High
P09055	High	High	High		High	High
P09055	High	High	High		High	High
P09055	High	High	High		High	High
P09055	High	High	High		High	High
P09055	High	High	High		High	High
P09055	High	High	High		High	High
P09055	High	High	High		High	High
P09055	High	High			High	#N/A
P09581	High	High	High		High	High
P10605	High	High			High	#N/A
P11152	High	High	High		High	High
P11438	High	High	High		High	High
P11438	High	High	High		High	High
P11438	High	High	High		High	High
P11438	High	High	High		High	High
P11438	High	High	High		High	High
P11438	High	High	High		High	High
P11438	High	High	High		High	High
P11438	High	High	High		High	High
P11438	High	High			High	#N/A
P11609	High	High	High		High	High
P11609	High	High	High		High	High
P11688	High	High	High		High	High
P11688	High	High	High		High	High
P11688	High	High	High		High	High
P11881-8	High	High	High		High	High
P12265	High	High	High		High	High
P12265	High	High	High		High	High
P12265	High	High	High		High	High
P13597	High	High	High		High	High
P13597	High	High	High		High	High
P13597	High	High	High		High	High
P13597	High	High	High		High	High
P14094	High	High	High		High	High
P14094	High	High	High		High	High
P14094	High	High	High		High	High
P14426	High	High	High		High	High
P14438	High	High	High		High	High
P14438	High	High	High		High	High
P15208	High	High	High		High	High
P15208	High	High	High		High	High
P15208	High	High	High		High	High
P16294	High	High	High		High	High
P16301	High	High	High		High	High
P16406	High	High	High		High	High
P16406	High	High	High		High	High
P16406	High	High	High		High	High
P16675	High	High	High		High	High
P16675	High	High	High		High	High
P16675	High	High	High		High	High
P16675	High	High	High		High	High
P17047	High	High	High		High	High
P17047	High	High	High		High	High
P17047	High	High	High		High	High
P17047	High	High	High		High	High
P17047	High	High	High		High	High
P17047	High	High	High		High	High
P17439	High	High	High		High	High
P17439	High	High	High		High	High
P17439	High	High	High		High	High
P17439	High	High			High	#N/A
P17717	High	High	High		High	High
P18181	High	High			High	#N/A
P18181	High	High			High	#N/A
P18572-2	High	High	High		High	High
P18572-2	High	High	High		High	High
P18572-2	High	High	High		High	High
P18572-2	High	High	High		High	High
P18572-2	High	High	High		High	High
P18572-2	High	High	High		High	High
P21440	High	High	High		High	High
P23953	High	High	High		High	High
P23953	High	High	High		High	High
P23953	High	High	High		High	High
P23953	High	High	High		High	High
P24638	High	High	High		High	High
P24638	High	High	High		High	High
P24668	High	High	High		High	High
P24668	High	High	High		High	High
P25446	High	High			High	#N/A
P25446	High	High			High	#N/A
P26151	High	High			High	#N/A
P26262	High	High	High		High	High
P26262	High	High	High		High	High
P27046	High	High	High		High	High
P27046	High	High	High		High	High
P27656	High	High	High		High	High
P27656	High	High			High	#N/A
P28653	High	High	High		High	High
P28653	High	High	High		High	High
P28654	High	High	High		High	High
P28665	High	High	High		High	High
P28665	High	High	High		High	High
P28665	High	High	High		High	High
P28665	High	High	High		High	High
P28665	High	High	High		High	High
P28665	High	High			High	#N/A
P28666	High	High	High		High	High
P28666	High	High	High		High	High
P28666	High	High	High		High	High
P28666	High	High	High		High	High
P28798	High	High			High	#N/A
P28843	High	High	High		High	High
P28843	High	High	High		High	High
P29416	High	High	High		High	High
P29533-2	High	High	High		High	High
P29699	High	High	High		High	High
P29754	High	High	High		High	High
P29788	High	High	High		High	High
P29788	High	High	High		High	High
P30204-2	High	High	High		High	High
P30204-2	High	High	High		High	High
P30204-2	High	High	High		High	High
P30204-2	High	High			High	#N/A
P31649	High	High	High		High	High
P31809-2	High	High	High		High	High
P31809-2	High	High	High		High	High
P31809-2	High	High	High		High	High
P31809-2	High	High	High		High	High
P31809-2	High	High	High		High	High
P31809-2	High	High			High	#N/A
P31809-2;P31809-3	High	High	High		High	High
P31809-2;P31809-3	High	High	High		High	High
P31809-2;P31809-3	High	High	High		High	High
P31809-2;P31809-3	High	High	High		High	High
P31809-2;P31809-3	High	High	High		High	High
P31809-2;P31809-3	High	High	High		High	High
P31809-2;P31809-3	High	High	High		High	High
P31809-3	High	High	High		High	High
P32507-2	High	High	High		High	High
P33587	High	High	High		High	High
P34927	High	High	High		High	High
P34927	High	High	High		High	High
P34927	High	High			High	#N/A
P35330	High	High	High		High	High
P35441;Q80YQ1	High	High	High		High	High
P35441;Q80YQ1	High	High	High		High	High
P35441;Q80YQ1	High	High			High	#N/A
P35803-5	High	High			High	#N/A
P35822	High	High	High		High	High
P35917	High	High	High		High	High
P35951	High	High			High	#N/A
P41233	High	High	High		High	High
P41233	High	High	High		High	High
P41233	High	High	High		High	High
P41233	High	High	High		High	High
P41731	High	High			High	#N/A
P42703	High	High	High		High	High
P42703	High	High	High		High	High
P42703	High	High			High	#N/A
P43006-3	High	High	High		High	High
P43006-3	High	High	High		High	High
P43006-3	High	High	High		High	High
P46978	High	High	High		High	High
P47801	High	High	High		High	High
P50608	High	High	High		High	High
P51885	High	High	High		High	High
P52430	High	High	High		High	High
P52430	High	High	High		High	High
P52795	High	High	High		High	High
P54751	High	High	High		High	High
P54751	High	High	High		High	High
P55065	High	High	High		High	High
P55065	High	High	High		High	High
P55284	High	High	High		High	High
P55292-2	High	High	High		High	High
P55772	High	High	High		High	High
P56528	High	High	High		High	High
P56528	High	High	High		High	High
P56528	High	High	High		High	High
P57716	High	High	High		High	High
P57757	High	High	High		High	High
P59383	High	High	High		High	High
P70194	High	High	High		High	High
P70194	High	High	High		High	High
P70194	High	High	High		High	High
P70194	High	High	High		High	High
P70302	High	High	High		High	High
P70389	High	High	High		High	High
P70665-2	High	High	High		High	High
P70699	High	High	High		High	High
P70699	High	High	High		High	High
P82349	High	High	High		High	High
P97333	High	High	High		High	High
P97370	High	High	High		High	High
P97370	High	High	High		High	High
P97449	High	High	High		High	High
P97449	High	High	High		High	High
P97449	High	High	High		High	High
P97449	High	High	High		High	High
P97449	High	High	High		High	High
P97751	High	High	High		High	High
P97785-2	High	High	High		High	High
P97792-2	High	High	High		High	High
P97792-2	High	High	High		High	High
P97798-5	High	High	High		High	High
P97821	High	High	High		High	High
P98086	High	High	High		High	High
Q00896;P22599;Q00897	High	High	High		High	High
Q01339	High	High	High		High	High
Q01339	High	High	High		High	High
Q01339	High	High	High		High	High
Q02013	High	High	High		High	High
Q02788	High	High	High		High	High
Q03311	High	High	High		High	High
Q03311	High	High	High		High	High
Q03734	High	High	High		High	High
Q03734	High	High	High		High	High
Q04592	High	High	High		High	High
Q05186	High	High	High		High	High
Q05685	High	High	High		High	High
Q05793	High	High	High		High	High
Q06770	High	High	High		High	High
Q06770	High	High	High		High	High
Q06890	High	High	High		High	High
Q07113	High	High	High		High	High
Q07113	High	High	High		High	High
Q07113	High	High	High		High	High
Q07113	High	High	High		High	High
Q07113	High	High	High		High	High
Q07113	High	High	High		High	High
Q07113	High	High			High	#N/A
Q07456	High	High	High		High	High
Q07456	High	High	High		High	High
Q07797	High	High	High		High	High
Q07797	High	High	High		High	High
Q07797	High	High	High		High	High
Q07797	High	High			High	#N/A
Q07968	High	High	High		High	High
Q07968	High	High			High	#N/A
Q08481-2	High	High	High		High	High
Q08481-2	High	High	High		High	High
Q08481-2	High	High			High	#N/A
Q08857	High	High	High		High	High
Q08857	High	High	High		High	High
Q09200	High	High	High		High	High
Q09200	High	High			High	#N/A
Q19LI2	High	High	High		High	High
Q2VLH6	High	High	High		High	High
Q3TCN2	High	High	High		High	High
Q3TDQ1	High	High	High		High	High
Q3TJI8	High	High	High		High	High
Q3TKX1	High	High	High		High	High
Q3U3W2	High	High	High		High	High
Q3UDW8-2	High	High	High		High	High
Q3UHH8	High	High			High	#N/A
Q3UN00	High	High	High		High	High
Q3UN00	High	High	High		High	High
Q3UQ28	High	High	High		High	High
Q3UUQ7	High	High	High		High	High
Q3V3R4	High	High	High		High	High
Q3V3R4	High	High	High		High	High
Q3V3R4	High	High	High		High	High
Q3V3R4	High	High	High		High	High
Q3V3R4	High	High	High		High	High
Q3V3R4	High	High	High		High	High
Q3V3R4	High	High	High		High	High
Q3V3R4	High	High	High		High	High
Q4PZA2-3	High	High	High		High	High
Q4PZA2-3	High	High	High		High	High
Q4PZA2-3	High	High	High		High	High
Q4PZA2-3	High	High	High		High	High
Q542I8	High	High	High		High	High
Q542I8	High	High			High	#N/A
Q571E4	High	High	High		High	High
Q5FWI3	High	High	High		High	High
Q5FWI3	High	High	High		High	High
Q5PT54	High	High	High		High	High
Q5SVW9	High	High	High		High	High
Q5U462	High	High	High		High	High
Q5XF89	High	High	High		High	High
Q60590	High	High	High		High	High
Q60738	High	High	High		High	High
Q60805	High	High	High		High	High
Q61129	High	High	High		High	High
Q61129	High	High	High		High	High
Q61391	High	High	High		High	High
Q61391	High	High	High		High	High
Q61391	High	High			High	#N/A
Q61469	High	High	High		High	High
Q61495	High	High			High	#N/A
Q61503	High	High	High		High	High
Q61508-2	High	High	High		High	High
Q61526	High	High	High		High	High
Q61526	High	High	High		High	High
Q61526	High	High	High		High	High
Q61549	High	High	High		High	High
Q61606	High	High	High		High	High
Q61606	High	High	High		High	High
Q61646	High	High	High		High	High
Q61646	High	High	High		High	High
Q61646	High	High	High		High	High
Q61646	High	High	High		High	High
Q61646	High	High	High		High	High
Q61646	High	High	High		High	High
Q61646	High	High	High		High	High
Q61646	High	High	High		High	High
Q61702	High	High	High		High	High
Q61735	High	High	High		High	High
Q61735	High	High	High		High	High
Q61735	High	High	High		High	High
Q61830	High	High	High		High	High
Q61830	High	High	High		High	High
Q61838	High	High	High		High	High
Q61838	High	High	High		High	High
Q61838	High	High	High		High	High
Q61838	High	High			High	#N/A
Q62028	High	High	High		High	High
Q62028	High	High	High		High	High
Q62086	High	High	High		High	High
Q62087	High	High	High		High	High
Q62087	High	High	High		High	High
Q62178	High	High	High		High	High
Q62192	High	High			High	#N/A
Q62230-3	High	High	High		High	High
Q62230-3	High	High	High		High	High
Q62313	High	High	High		High	High
Q63880	High	High	High		High	High
Q63880	High	High	High		High	High
Q63886	High	High	High		High	High
Q64487-3	High	High	High		High	High
Q64726	High	High	High		High	High
Q6AXE3	High	High	High		High	High
Q6DYE8	High	High	High		High	High
Q6DYE8	High	High	High		High	High
Q6DYE8	High	High			High	#N/A
Q6GQT6	High	High	High		High	High
Q6GQT9	High	High	High		High	High
Q6GQT9	High	High	High		High	High
Q6IFZ6	High	High	High		High	High
Q6P5E4	High	High	High		High	High
Q6P6I8	High	High	High		High	High
Q6P6I8	High	High	High		High	High
Q6P6I8	High	High	High		High	High
Q6P6I8	High	High			High	#N/A
Q6P6I8	High	High	High		High	High
Q6P6J9	High	High	High		High	High
Q6P6J9	High	High	High		High	High
Q6P6J9	High	High	High		High	High
Q6P6J9	High	High			High	#N/A
Q6PD26	High	High	High		High	High
Q6PE70	High	High	High		High	High
Q6PE70	High	High			High	#N/A
Q71KU9	High	High	High		High	High
Q71KU9	High	High	High		High	High
Q80V26	High	High	High		High	High
Q80X19-2	High	High	High		High	High
Q80X19-2	High	High	High		High	High
Q80X71	High	High	High		High	High
Q80YQ1	High	High	High		High	High
Q80YX0	High	High			High	#N/A
Q8BFR4	High	High	High		High	High
Q8BFR4	High	High	High		High	High
Q8BG07-2	High	High	High		High	High
Q8BG07-2	High	High	High		High	High
Q8BG07-2	High	High	High		High	High
Q8BGQ4-2	High	High	High		High	High
Q8BGT0	High	High	High		High	High
Q8BH24	High	High	High		High	High
Q8BHC0	High	High	High		High	High
Q8BHC0	High	High			High	#N/A
Q8BHG3	High	High	High		High	High
Q8BHG3	High	High	High		High	High
Q8BI84-2	High	High	High		High	High
Q8BI84-2	High	High			High	#N/A
Q8BJ83-2	High	High	High		High	High
Q8BJS4-3	High	High	High		High	High
Q8BK48	High	High	High		High	High
Q8BKU8-2	High	High	High		High	High
Q8BM88	High	High			High	#N/A
Q8BMW7	High	High	High		High	High
Q8BMW7	High	High	High		High	High
Q8BND5-3	High	High	High		High	High
Q8BTJ4-2	High	High	High		High	High
Q8BTJ4-2	High	High	High		High	High
Q8BWP8-2	High	High	High		High	High
Q8BWQ1	High	High	High		High	High
Q8BWQ1	High	High	High		High	High
Q8BXB6	High	High	High		High	High
Q8BXB6	High	High			High	#N/A
Q8BXN9-3	High	High	High		High	High
Q8BXZ1	High	High	High		High	High
Q8BY89-2	High	High	High		High	High
Q8BY89-2	High	High	High		High	High
Q8BY89-2	High	High	High		High	High
Q8BYB9	High	High	High		High	High
Q8BYI8	High	High	High		High	High
Q8BYU6	High	High	High		High	High
Q8BYW9	High	High	High		High	High
Q8C0Z1	High	High			High	#N/A
Q8C129	High	High	High		High	High
Q8C129	High	High	High		High	High
Q8C165	High	High	High		High	High
Q8C165	High	High	High		High	High
Q8C165	High	High	High		High	High
Q8C341	High	High	High		High	High
Q8C7X2-3	High	High	High		High	High
Q8CFX3	High	High	High		High	High
Q8CFX3	High	High	High		High	High
Q8CG14	High	High	High		High	High
Q8CID3	High	High			High	#N/A
Q8CIF4	High	High	High		High	High
Q8CIF4	High	High	High		High	High
Q8CIF4	High	High	High		High	High
Q8CJH3	High	High	High		High	High
Q8CJH3	High	High			High	#N/A
Q8JZZ0	High	High	High		High	High
Q8JZZ0	High	High	High		High	High
Q8JZZ7	High	High			High	#N/A
Q8K0E8	High	High	High		High	High
Q8K0E8	High	High	High		High	High
Q8K1B3	High	High	High		High	High
Q8K4Q8	High	High	High		High	High
Q8K4Q8	High	High	High		High	High
Q8K4Q8	High	High	High		High	High
Q8QZR3	High	High	High		High	High
Q8R0F3	High	High	High		High	High
Q8R0T6	High	High	High		High	High
Q8R121	High	High	High		High	High
Q8R143	High	High			High	#N/A
Q8R2E9	High	High	High		High	High
Q8R2E9	High	High	High		High	High
Q8R2Q8	High	High	High		High	High
Q8R2Q8	High	High	High		High	High
Q8R2R1	High	High	High		High	High
Q8R3G9	High	High	High		High	High
Q8R3H7	High	High	High		High	High
Q8R4U0	High	High	High		High	High
Q8R4U0	High	High	High		High	High
Q8R4U0	High	High	High		High	High
Q8R4U0	High	High	High		High	High
Q8R4U0	High	High	High		High	High
Q8R4U0	High	High	High		High	High
Q8R4Y4-2	High	High	High		High	High
Q8R4Y4-2	High	High	High		High	High
Q8R4Y4-2	High	High	High		High	High
Q8R4Y4-2	High	High	High		High	High
Q8R4Y4-2	High	High			High	#N/A
Q8R5M8-5	High	High	High		High	High
Q8R5M8-5	High	High	High		High	High
Q8VBZ3	High	High	High		High	High
Q8VCC2	High	High	High		High	High
Q8VCI0	High	High	High		High	High
Q8VCI0	High	High	High		High	High
Q8VCT4	High	High	High		High	High
Q8VCT4	High	High	High		High	High
Q8VCU1	High	High	High		High	High
Q8VCU1	High	High	High		High	High
Q8VD31	High	High	High		High	High
Q8VEB4	High	High	High		High	High
Q8VEK0	High	High	High		High	High
Q8VEK0	High	High	High		High	High
Q8VI56-2	High	High	High		High	High
Q91WP0	High	High			High	#N/A
Q91WU0	High	High	High		High	High
Q91WU0	High	High			High	#N/A
Q91X72	High	High	High		High	High
Q91XA2	High	High	High		High	High
Q91XD7	High	High	High		High	High
Q91XL1	High	High	High		High	High
Q91XX1	High	High	High		High	High
Q91Y74	High	High	High		High	High
Q91Y74	High	High	High		High	High
Q91YH5-2	High	High	High		High	High
Q91YQ5	High	High	High		High	High
Q91ZX7	High	High	High		High	High
Q91ZX7	High	High	High		High	High
Q91ZX7	High	High	High		High	High
Q91ZX7	High	High	High		High	High
Q91ZX7	High	High	High		High	High
Q91ZX7	High	High	High		High	High
Q91ZX7	High	High	High		High	High
Q91ZX7	High	High	High		High	High
Q91ZX7	High	High	High		High	High
Q91ZX7	High	High	High		High	High
Q91ZX7	High	High	High		High	High
Q91ZX7	High	High	High		High	High
Q91ZX7	High	High	High		High	High
Q91ZX7	High	High	High		High	High
Q91ZX7	High	High	High		High	High
Q91ZX7	High	High	High		High	High
Q91ZX7	High	High	High		High	High
Q91ZX7	High	High	High		High	High
Q91ZX7	High	High	High		High	High
Q91ZX7	High	High	High		High	High
Q91ZX7	High	High	High		High	High
Q91ZX7	High	High	High		High	High
Q91ZX7	High	High	High		High	High
Q91ZX7	High	High			High	#N/A
Q91ZX7	High	High			High	#N/A
Q91ZX7	High	High			High	#N/A
Q91ZX7	High	High			High	#N/A
Q921I1	High	High	High		High	High
Q921I1	High	High	High		High	High
Q923B6	High	High	High		High	High
Q99J21	High	High	High		High	High
Q99K41	High	High	High		High	High
Q99K41	High	High	High		High	High
Q99KF1	High	High	High		High	High
Q99KW9	High	High	High		High	High
Q99MB1	High	High	High		High	High
Q99MQ4	High	High	High		High	High
Q99N28	High	High	High		High	High
Q99N32	High	High			High	#N/A
Q9CPW5	High	High	High		High	High
Q9CQ01	High	High	High		High	High
Q9CQ88	High	High	High		High	High
Q9CQW3	High	High	High		High	High
Q9CR23	High	High	High		High	High
Q9CY50	High	High	High		High	High
Q9CYA0	High	High	High		High	High
Q9CYD3	High	High			High	#N/A
Q9CZR2	High	High	High		High	High
Q9CZR2	High	High	High		High	High
Q9CZT5	High	High			High	#N/A
Q9D136	High	High	High		High	High
Q9D1H9	High	High	High		High	High
Q9D1H9	High	High	High		High	High
Q9D3L0	High	High			High	#N/A
Q9D586	High	High	High		High	High
Q9D7N9	High	High	High		High	High
Q9DA75	High	High			High	#N/A
Q9DAC2	High	High	High		High	High
Q9DAW9	High	High	High		High	High
Q9DBB9	High	High	High		High	High
Q9DBG6	High	High	High		High	High
Q9DBH5	High	High	High		High	High
Q9DBI0-3	High	High	High		High	High
Q9DC42	High	High			High	#N/A
Q9EPK6	High	High	High		High	High
Q9EPT5	High	High	High		High	High
Q9EQH2	High	High	High		High	High
Q9EQH2	High	High	High		High	High
Q9EQJ0	High	High	High		High	High
Q9ESB3	High	High	High		High	High
Q9ESB3	High	High	High		High	High
Q9ESB3	High	High	High		High	High
Q9ESB3	High	High	High		High	High
Q9ET22	High	High	High		High	High
Q9ET30	High	High	High		High	High
Q9JHE3	High	High	High		High	High
Q9JHJ3	High	High	High		High	High
Q9JHJ3	High	High	High		High	High
Q9JIS8	High	High	High		High	High
Q9JJF9	High	High	High		High	High
Q9JJL3	High	High	High		High	High
Q9JJL3	High	High	High		High	High
Q9JJL3	High	High			High	#N/A
Q9JKF6	High	High	High		High	High
Q9JKF6	High	High	High		High	High
Q9JKR6	High	High	High		High	High
Q9JKR6	High	High	High		High	High
Q9JKR6	High	High	High		High	High
Q9JKR6	High	High	High		High	High
Q9JKR6	High	High	High		High	High
Q9JKR6	High	High			High	#N/A
Q9JKR6	High	High			High	#N/A
Q9QWR8	High	High	High		High	High
Q9QYC7	High	High	High		High	High
Q9QYC7	High	High	High		High	High
Q9QZ25	High	High	High		High	High
Q9QZC2	High	High	High		High	High
Q9QZC2	High	High			High	#N/A
Q9R013	High	High	High		High	High
Q9R182	High	High	High		High	High
Q9WTR5	High	High	High		High	High
Q9WU60	High	High	High		High	High
Q9WUH7	High	High	High		High	High
Q9WUH7	High	High	High		High	High
Q9WUH7	High	High	High		High	High
Q9WUH7	High	High			High	#N/A
Q9WUZ9	High	High	High		High	High
Q9WV54	High	High	High		High	High
Q9WV54	High	High	High		High	High
Q9WV91	High	High			High	#N/A
Q9WV91	High	High			High	#N/A
Q9WVD4	High	High	High		High	High
Q9WVF5	High	High	High		High	High
Q9WVF5	High	High	High		High	High
Q9WVF5	High	High	High		High	High
Q9WVJ3-2	High	High	High		High	High
Q9WVL3-2	High	High	High		High	High
Q9Z0K8	High	High	High		High	High
Q9Z0K8	High	High	High		High	High
Q9Z0L8-2	High	High	High		High	High
Q9Z0L8-2	High	High	High		High	High
Q9Z0L8-2	High	High	High		High	High
Q9Z0L8-2	High	High			High	#N/A
Q9Z0M5	High	High	High		High	High
Q9Z0M5	High	High	High		High	High
Q9Z247	High	High	High		High	High
Q9Z2A9-2	High	High	High		High	High
Q9Z2A9-2	High	High	High		High	High
Q9Z2L6	High	High			High	#N/A
Q9Z329-2	High	High			High	#N/A
S4R1M0	High	High	High		High	High
S4R1M0	High	High			High	#N/A
V9GX00	High	High	High		High	High
V9GX00	High	High	High		High	High
V9GX00	High	High	High		High	High
V9GX00	High	High	High		High	High
Z4YLN2	High	High			High	#N/A
A0A0A6YWC0		High	High		#N/A	High
A0A0A6YWP3		High			#N/A	#N/A
A0A0B4J1E4		High	High		#N/A	High
A2A5K8		High	High		#N/A	High
A2AAA9		High	High		#N/A	High
A2AKI5		High	High		#N/A	High
A2AWF8		High			#N/A	#N/A
A2AWF8		High			#N/A	#N/A
A6H6E2		High			#N/A	#N/A
A6PWZ9		High			#N/A	#N/A
A6X935-2		High	High		#N/A	High
A6X935-2		High	High		#N/A	High
A9C437		High			#N/A	#N/A
B1AU41		High	High		#N/A	High
B2RRC9		High			#N/A	#N/A
B2RU80		High			#N/A	#N/A
B2RU80		High			#N/A	#N/A
B2RXS4		High	High		#N/A	High
B2RXS4		High	High		#N/A	High
B2RXS4		High			#N/A	#N/A
B5THE2		High			#N/A	#N/A
B7ZNJ1		High	High		#N/A	High
B8JJ81		High			#N/A	#N/A
D3YXU8		High	High		#N/A	High
D3Z2V4		High	High		#N/A	High
D3Z354		High	High		#N/A	High
D3Z5Y0		High			#N/A	#N/A
D3Z665		High			#N/A	#N/A
D6RH54		High	High		#N/A	High
E9Q2T3		High			#N/A	#N/A
E9Q4G8		High	High		#N/A	High
E9Q6A6		High			#N/A	#N/A
E9Q8P6		High	High		#N/A	High
F2Z3W4		High			#N/A	#N/A
F6WMD1		High			#N/A	#N/A
F6Y6L6		High	High		#N/A	High
F6ZM31		High			#N/A	#N/A
F7A1B4		High	High		#N/A	High
F8VQD7		High			#N/A	#N/A
F8VQJ3		High			#N/A	#N/A
F8VQL0		High	High		#N/A	High
G3X9S2		High	High		#N/A	High
G5E8Q8		High			#N/A	#N/A
H3BIX4		High	High		#N/A	High
H3BIX4		High			#N/A	#N/A
H3BL34		High	High		#N/A	High
M0QWG8		High			#N/A	#N/A
O09159		High			#N/A	#N/A
O35114		High	High		#N/A	High
O35114		High	High		#N/A	High
O35114		High			#N/A	#N/A
O35114		High			#N/A	#N/A
O35114		High			#N/A	#N/A
O35516-2		High			#N/A	#N/A
O35598		High	High		#N/A	High
O70570		High	High		#N/A	High
O88783		High	High		#N/A	High
O88783		High			#N/A	#N/A
O89001		High	High		#N/A	High
O89017		High	High		#N/A	High
O89017		High			#N/A	#N/A
P01868		High			#N/A	#N/A
P01872		High	High		#N/A	High
P01899		High	High		#N/A	High
P03987-2		High	High		#N/A	High
P04202		High	High		#N/A	High
P05555-2		High			#N/A	#N/A
P06684		High	High		#N/A	High
P06797		High	High		#N/A	High
P07759		High			#N/A	#N/A
P09242		High			#N/A	#N/A
P10810		High			#N/A	#N/A
P11247		High			#N/A	#N/A
P11438		High	High		#N/A	High
P11438		High			#N/A	#N/A
P13597		High			#N/A	#N/A
P15208		High			#N/A	#N/A
P16301		High	High		#N/A	High
P17439		High	High		#N/A	High
P18572-2		High			#N/A	#N/A
P18581		High			#N/A	#N/A
P22599;Q00896;Q00897		High	High		#N/A	High
P23953		High	High		#N/A	High
P25446		High			#N/A	#N/A
P26618-2		High			#N/A	#N/A
P27046		High	High		#N/A	High
P28654		High	High		#N/A	High
P28665		High			#N/A	#N/A
P28665		High			#N/A	#N/A
P28798		High			#N/A	#N/A
P29699		High	High		#N/A	High
P29699		High	High		#N/A	High
P31649		High	High		#N/A	High
P31809-2;P31809-3		High			#N/A	#N/A
P35441		High	High		#N/A	High
P35918-2		High			#N/A	#N/A
P42703		High			#N/A	#N/A
P49182		High	High		#N/A	High
P49182		High			#N/A	#N/A
P55292-2		High			#N/A	#N/A
P57716		High	High		#N/A	High
P57716		High	High		#N/A	High
P70194		High	High		#N/A	High
P70194		High	High		#N/A	High
P70206		High			#N/A	#N/A
P70389		High			#N/A	#N/A
P70699		High	High		#N/A	High
P97370		High	High		#N/A	High
P97449		High	High		#N/A	High
P98064		High			#N/A	#N/A
Q02788		High			#N/A	#N/A
Q06770		High	High		#N/A	High
Q06770		High			#N/A	#N/A
Q07113		High	High		#N/A	High
Q09200		High	High		#N/A	High
Q3TDQ1		High	High		#N/A	High
Q3TKX1		High	High		#N/A	High
Q3TWZ5		High			#N/A	#N/A
Q3UEP4		High	High		#N/A	High
Q3V3R4		High	High		#N/A	High
Q3V3R4		High	High		#N/A	High
Q3V3R4		High	High		#N/A	High
Q3V3R4		High			#N/A	#N/A
Q3V3R4		High			#N/A	#N/A
Q4PZA2-3		High	High		#N/A	High
Q4PZA2-3		High			#N/A	#N/A
Q542I8		High			#N/A	#N/A
Q571E4		High			#N/A	#N/A
Q61029-3		High			#N/A	#N/A
Q61503		High	High		#N/A	High
Q61702		High			#N/A	#N/A
Q61739-2		High	High		#N/A	High
Q62230-3		High			#N/A	#N/A
Q63886		High	High		#N/A	High
Q69ZN6-2		High			#N/A	#N/A
Q6P6J9		High			#N/A	#N/A
Q6P6J9		High			#N/A	#N/A
Q6PHU5		High			#N/A	#N/A
Q80YS4		High			#N/A	#N/A
Q80YX8		High	High		#N/A	High
Q8BFR4		High	High		#N/A	High
Q8BFR4		High	High		#N/A	High
Q8BGQ4-2		High	High		#N/A	High
Q8BJ83-2		High	High		#N/A	High
Q8BLF1		High	High		#N/A	High
Q8BM88		High	High		#N/A	High
Q8BWQ1		High			#N/A	#N/A
Q8BXN9-3		High	High		#N/A	High
Q8BYB9		High			#N/A	#N/A
Q8C129		High			#N/A	#N/A
Q8C2R4		High			#N/A	#N/A
Q8C7X2-3		High			#N/A	#N/A
Q8CIF4		High	High		#N/A	High
Q8CJ85		High	High		#N/A	High
Q8K297		High	High		#N/A	High
Q8K385		High	High		#N/A	High
Q8K441		High	High		#N/A	High
Q8K4Q8		High	High		#N/A	High
Q8R0Z6		High	High		#N/A	High
Q8R2S8		High	High		#N/A	High
Q8R4U0		High	High		#N/A	High
Q8R4U0		High			#N/A	#N/A
Q8R4U0		High	High		#N/A	High
Q8R4U0		High	High		#N/A	High
Q8R4U0		High			#N/A	#N/A
Q8R4Y4-2		High			#N/A	#N/A
Q8R4Y4-2		High			#N/A	#N/A
Q8R4Y4-2		High			#N/A	#N/A
Q8R5M8-5		High	High		#N/A	High
Q8R5M8-5		High	High		#N/A	High
Q8VHF2-2		High	High		#N/A	High
Q8VI78		High			#N/A	#N/A
Q91WU0		High			#N/A	#N/A
Q91Y47		High			#N/A	#N/A
Q91Y57		High			#N/A	#N/A
Q91Y74		High	High		#N/A	High
Q91ZX7		High	High		#N/A	High
Q91ZX7		High	High		#N/A	High
Q91ZX7		High			#N/A	#N/A
Q91ZX7		High			#N/A	#N/A
Q91ZX7		High			#N/A	#N/A
Q99K41		High			#N/A	#N/A
Q99MB1		High	High		#N/A	High
Q99MR3		High			#N/A	#N/A
Q9CPW5		High	High		#N/A	High
Q9CY50		High	High		#N/A	High
Q9CZT5		High	High		#N/A	High
Q9D8C2		High			#N/A	#N/A
Q9DAC2		High			#N/A	#N/A
Q9DBB9		High	High		#N/A	High
Q9DBI0-3		High	High		#N/A	High
Q9ESB3		High	High		#N/A	High
Q9ESB3		High			#N/A	#N/A
Q9JJF9		High	High		#N/A	High
Q9JJN5		High			#N/A	#N/A
Q9JKF6		High	High		#N/A	High
Q9JKR6		High			#N/A	#N/A
Q9JKR6		High			#N/A	#N/A
Q9R069		High	High		#N/A	High
Q9R182		High			#N/A	#N/A
Q9WU60		High	High		#N/A	High
Q9WVF5		High	High		#N/A	High
Q9WVT6		High	High		#N/A	High
Q9Z0F8-2		High			#N/A	#N/A
S4R1M0		High	High		#N/A	High
Z4YLN2		High	High		#N/A	High
A0A075B6A3	High				#N/A	#N/A
A0A087WNL6	High				#N/A	#N/A
A0A0A6YWC0	High				#N/A	#N/A
A2AAA9	High				#N/A	#N/A
A2AMH3	High				#N/A	#N/A
A2ARA8	High				#N/A	#N/A
B2RU80	High		High		#N/A	#N/A
B2RXS4	High				#N/A	#N/A
B5THE2	High				#N/A	#N/A
D3Z0Q9	High		High		#N/A	#N/A
D3Z3A3	High		High		#N/A	#N/A
E0CXJ2	High				#N/A	#N/A
E0CZA5	High				#N/A	#N/A
E9PVI4	High				#N/A	#N/A
E9QNL8	High				#N/A	#N/A
E9QPG8	High		High		#N/A	#N/A
F2Z4A3	High				#N/A	#N/A
F6QD87	High		High		#N/A	#N/A
F7CIP8	High		High		#N/A	#N/A
F7CIP8	High				#N/A	#N/A
F7CIP8	High				#N/A	#N/A
G3UY90	High				#N/A	#N/A
H3BIX4	High		High		#N/A	#N/A
H3BL34	High				#N/A	#N/A
H3BLE9	High				#N/A	#N/A
O08705	High				#N/A	#N/A
O09043	High				#N/A	#N/A
O35114	High				#N/A	#N/A
O35114	High				#N/A	#N/A
O35114	High				#N/A	#N/A
O35129	High				#N/A	#N/A
O35604	High				#N/A	#N/A
O54890	High				#N/A	#N/A
O70362	High		High		#N/A	#N/A
O78196	High				#N/A	#N/A
O88188	High				#N/A	#N/A
O88783	High				#N/A	#N/A
O88783	High				#N/A	#N/A
O88856	High				#N/A	#N/A
O89023	High		High		#N/A	#N/A
P01872	High		High		#N/A	#N/A
P01872	High				#N/A	#N/A
P02469	High				#N/A	#N/A
P07759	High				#N/A	#N/A
P11438	High				#N/A	#N/A
P11499;P08113	High				#N/A	#N/A
P11688	High				#N/A	#N/A
P14094	High				#N/A	#N/A
P16675	High				#N/A	#N/A
P16675	High				#N/A	#N/A
P17047	High		High		#N/A	#N/A
P17439	High				#N/A	#N/A
P18181	High				#N/A	#N/A
P21440	High				#N/A	#N/A
P29477	High				#N/A	#N/A
P30204-2	High				#N/A	#N/A
P30204-2	High				#N/A	#N/A
P31809-2;P31809-3	High				#N/A	#N/A
P31809-2;P31809-3	High				#N/A	#N/A
P41233	High				#N/A	#N/A
P42703	High				#N/A	#N/A
P43006-3	High				#N/A	#N/A
P50247	High		High		#N/A	#N/A
P55772	High				#N/A	#N/A
P56528	High		High		#N/A	#N/A
P70194	High		High		#N/A	#N/A
P70194	High				#N/A	#N/A
P70302	High				#N/A	#N/A
P70665-2	High		High		#N/A	#N/A
P70699	High				#N/A	#N/A
P97333	High		High		#N/A	#N/A
P97785-2	High				#N/A	#N/A
P97821	High				#N/A	#N/A
Q03142-2	High				#N/A	#N/A
Q07456	High				#N/A	#N/A
Q07456	High				#N/A	#N/A
Q07456	High				#N/A	#N/A
Q3TDQ1	High				#N/A	#N/A
Q3TJI8	High		High		#N/A	#N/A
Q3TYD4	High		High		#N/A	#N/A
Q3TYD4	High		High		#N/A	#N/A
Q3V3R4	High				#N/A	#N/A
Q5FWI3	High		High		#N/A	#N/A
Q60805	High				#N/A	#N/A
Q61503	High		High		#N/A	#N/A
Q61503	High		High		#N/A	#N/A
Q62086	High				#N/A	#N/A
Q62086	High				#N/A	#N/A
Q62165	High				#N/A	#N/A
Q62178	High				#N/A	#N/A
Q62351	High				#N/A	#N/A
Q63880	High				#N/A	#N/A
Q64726	High				#N/A	#N/A
Q6P6I8	High				#N/A	#N/A
Q6P9J9-2	High		High		#N/A	#N/A
Q6PAR0-3	High				#N/A	#N/A
Q7TMR0	High		High		#N/A	#N/A
Q80X71	High				#N/A	#N/A
Q8BFR4	High				#N/A	#N/A
Q8BG07-2	High		High		#N/A	#N/A
Q8BHC0	High				#N/A	#N/A
Q8BXN9-3	High		High		#N/A	#N/A
Q8BY89-2	High		High		#N/A	#N/A
Q8C129	High				#N/A	#N/A
Q8C165	High				#N/A	#N/A
Q8C165	High				#N/A	#N/A
Q8C165	High				#N/A	#N/A
Q8CBM2	High		High		#N/A	#N/A
Q8CIF4	High		High		#N/A	#N/A
Q8CIF4	High				#N/A	#N/A
Q8K0E8	High				#N/A	#N/A
Q8K0L2-2	High				#N/A	#N/A
Q8R084	High		High		#N/A	#N/A
Q8R0T6	High				#N/A	#N/A
Q8R121	High				#N/A	#N/A
Q8R180	High				#N/A	#N/A
Q8R5M8-5	High				#N/A	#N/A
Q8VCF1-2	High				#N/A	#N/A
Q8VCI0	High				#N/A	#N/A
Q8VCS0	High		High		#N/A	#N/A
Q8VCS0	High		High		#N/A	#N/A
Q8VCT4	High				#N/A	#N/A
Q8VCT4	High				#N/A	#N/A
Q8VIB3	High		High		#N/A	#N/A
Q91Z92	High				#N/A	#N/A
Q91ZX7	High		High		#N/A	#N/A
Q91ZX7	High				#N/A	#N/A
Q91ZX7	High				#N/A	#N/A
Q921I1	High				#N/A	#N/A
Q9CRA0	High				#N/A	#N/A
Q9CZR2	High				#N/A	#N/A
Q9DBN1	High		High		#N/A	#N/A
Q9EQH2	High		High		#N/A	#N/A
Q9EQJ0	High				#N/A	#N/A
Q9JJL3	High				#N/A	#N/A
Q9QXC1	High				#N/A	#N/A
Q9QZC2	High				#N/A	#N/A
Q9R098	High				#N/A	#N/A
Q9R0E1	High				#N/A	#N/A
Q9R0E2	High		High		#N/A	#N/A
Q9R0E2	High				#N/A	#N/A
Q9WU60	High				#N/A	#N/A
Q9WUZ9	High				#N/A	#N/A
Q9WVF5	High				#N/A	#N/A
Q9WVF5	High				#N/A	#N/A
Q9WVJ3-2	High				#N/A	#N/A
Q9Z0K8	High				#N/A	#N/A
A0A075B6A3			High		#N/A	#N/A
A0A087WNL6			High		#N/A	#N/A
A2AS37			High		#N/A	#N/A
A2AWF8			High		#N/A	#N/A
D3Z2V4			High		#N/A	#N/A
D3Z2V4			High		#N/A	#N/A
D3Z521			High		#N/A	#N/A
D6RI72			High		#N/A	#N/A
E0CY66			High		#N/A	#N/A
E9PZ00			High		#N/A	#N/A
E9PZ00			High		#N/A	#N/A
E9Q251			High		#N/A	#N/A
E9Q2T3			High		#N/A	#N/A
E9Q6M5			High		#N/A	#N/A
E9Q6M5			High		#N/A	#N/A
F2Z4A3			High		#N/A	#N/A
F6RJC1			High		#N/A	#N/A
F6VQX8			High		#N/A	#N/A
G3X924			High		#N/A	#N/A
G3X9T8			High		#N/A	#N/A
G5E897			High		#N/A	#N/A
H3BJ04			High		#N/A	#N/A
M0QWG8			High		#N/A	#N/A
O08677-2			High		#N/A	#N/A
O08717			High		#N/A	#N/A
O09159			High		#N/A	#N/A
O35114			High		#N/A	#N/A
O35632			High		#N/A	#N/A
O35632			High		#N/A	#N/A
O88783			High		#N/A	#N/A
O89001			High		#N/A	#N/A
O89017			High		#N/A	#N/A
O89023			High		#N/A	#N/A
P01872			High		#N/A	#N/A
P05555-2			High		#N/A	#N/A
P07309			High		#N/A	#N/A
P11438			High		#N/A	#N/A
P13597			High		#N/A	#N/A
P14094			High		#N/A	#N/A
P16301			High		#N/A	#N/A
P16406			High		#N/A	#N/A
P17047			High		#N/A	#N/A
P17047			High		#N/A	#N/A
P17047			High		#N/A	#N/A
P20060			High		#N/A	#N/A
P26952-3			High		#N/A	#N/A
P28666			High		#N/A	#N/A
P30204-2			High		#N/A	#N/A
P31996-2			High		#N/A	#N/A
P32507-2			High		#N/A	#N/A
P35917			High		#N/A	#N/A
P42227-2			High		#N/A	#N/A
P57716			High		#N/A	#N/A
P63038			High		#N/A	#N/A
P63044			High		#N/A	#N/A
P70158			High		#N/A	#N/A
P70665-2			High		#N/A	#N/A
P70699			High		#N/A	#N/A
Q00896;P22599;Q00897			High		#N/A	#N/A
Q01339			High		#N/A	#N/A
Q06770			High		#N/A	#N/A
Q07113			High		#N/A	#N/A
Q08857			High		#N/A	#N/A
Q19LI2			High		#N/A	#N/A
Q3UMW8			High		#N/A	#N/A
Q3UUQ7			High		#N/A	#N/A
Q5XF89			High		#N/A	#N/A
Q61176			High		#N/A	#N/A
Q61830			High		#N/A	#N/A
Q61838			High		#N/A	#N/A
Q80X19-2			High		#N/A	#N/A
Q8BGQ4-2			High		#N/A	#N/A
Q8BHN0			High		#N/A	#N/A
Q8BK48			High		#N/A	#N/A
Q8BWT1			High		#N/A	#N/A
Q8BXA5			High		#N/A	#N/A
Q8C0Z1			High		#N/A	#N/A
Q8C129			High		#N/A	#N/A
Q8C196			High		#N/A	#N/A
Q8K2I4			High		#N/A	#N/A
Q8K440-2			High		#N/A	#N/A
Q8K441			High		#N/A	#N/A
Q8VCI0			High		#N/A	#N/A
Q8VCT4			High		#N/A	#N/A
Q91XL1			High		#N/A	#N/A
Q91ZX7			High		#N/A	#N/A
Q91ZX7			High		#N/A	#N/A
Q91ZX7			High		#N/A	#N/A
Q91ZX7			High		#N/A	#N/A
Q99JY8			High		#N/A	#N/A
Q9CR89-2			High		#N/A	#N/A
Q9DBB9			High		#N/A	#N/A
Q9DBB9			High		#N/A	#N/A
Q9DBB9			High		#N/A	#N/A
Q9DBB9			High		#N/A	#N/A
Q9DC42			High		#N/A	#N/A
Q9JHE3			High		#N/A	#N/A
Q9JJF9			High		#N/A	#N/A
Q9JKR6			High		#N/A	#N/A
Q9JL99-2			High		#N/A	#N/A
Q9QZ25			High		#N/A	#N/A
Q9R013			High		#N/A	#N/A
Q9WU60			High		#N/A	#N/A
Q9Z0F8-2			High		#N/A	#N/A
Q9Z0K8			High		#N/A	#N/A
V9GX00			High		#N/A	#N/A
