# Supplementary material for: A one-pot synthesis of hydrophilic poly(glycerol methacrylate) chitosan for highly selective enrichment of glycopeptides
Source: Royal Society of Chemistry journal article supplement (doi:10.1039/c9cc08016c), 2019-12-11
Supplement: c9cc08016c3.xlsx [file c9cc08016c3.xlsx]

## Sheet: Sheet1
Table S7. Identified N-glycopeptides containing deamidated Asn within N-X-S/T from 45μg mouse liver protein digest using TiO2. n denotes the N-linked lycosylation site ( with a total of LC-MS/MS run time of 120 mins). L1 and L2 and represent the two replicate experiments respectively.
Protein Group Accessions	Description	Sequence	Protein Group Accessions	Modifications	MH+ [Da]	q-Value	PEP	L1	XCorr L1	L2	XCorr L2	# Missed Cleavages
A0A0A6YWA8	Translocon-associated protein subunit beta (Fragment) OS=Mus musculus GN=Ssr2 PE=4 SV=1 - [A0A0A6YWA8_MOUSE]	IAPASnVSHTVVLRPLK	A0A0A6YWA8	N6(Deamidated)	1803.05	0	3.241e-05	High	1.8236			0
B1AR34	Asialoglycoprotein receptor 1 OS=Mus musculus GN=Asgr1 PE=4 SV=1 - [B1AR34_MOUSE]	QnFSnLTVSTEDQVK	B1AR34	N2(Deamidated); N5(Deamidated)	1711.81	0	0.09896			High	1.65119	0
B7ZNJ1	Fibronectin OS=Mus musculus GN=Fn1 PE=2 SV=1 - [B7ZNJ1_MOUSE]	LDAPTnLQFVnETDR	B7ZNJ1	N11(Deamidated)	1733.84	0	5.588e-05			High	2.42325	0
D3YTY9	Kininogen-1 OS=Mus musculus GN=Kng1 PE=4 SV=1 - [D3YTY9_MOUSE]	HSIEHFnnnTDHSHLFTLR	D3YTY9	N9(Deamidated)	2320.09	0	0.1258			High	0.725502	0
D3YYR5	P2X purinoceptor (Fragment) OS=Mus musculus GN=P2rx4 PE=3 SV=1 - [D3YYR5_MOUSE]	GVAVTnTSQLGFR	D3YYR5	N6(Deamidated)	1350.7	0	0.04097			High	1.15837	0
D6RFU9	Synaptophysin-like protein 1 OS=Mus musculus GN=Sypl PE=4 SV=1 - [D6RFU9_MOUSE]	nQTVTATFGYPFR	D6RFU9	N1(Deamidated)	1502.73	0	0.001605			High	2.27708	0
D6RH54	Solute carrier family 22 member 5 OS=Mus musculus GN=Slc22a5 PE=4 SV=1 - [D6RH54_MOUSE]	LATIAnFSELGLEPGR	D6RH54	N6(Deamidated)	1688.9	0	0.02996			High	1.60635	0
E9PV38	Protein Ces2g OS=Mus musculus GN=Ces2g PE=3 SV=1 - [E9PV38_MOUSE]	LnLTEEEK	E9PV38	N2(Deamidated)	976.488	0	0.03188			High	1.58511	0
G3UX26	Voltage-dependent anion-selective channel protein 2 (Fragment) OS=Mus musculus GN=Vdac2 PE=4 SV=1 - [G3UX26_MOUSE]	TGDFQLHTnVnnGTEFGGSIYQK	G3UX26	N12(Deamidated)	2528.18	0	0.04239			High	1.42306	0
G3XA10	Heterogeneous nuclear ribonucleoprotein U, isoform CRA_b OS=Mus musculus GN=Gm28062 PE=4 SV=1 - [G3XA10_MOUSE]	LQAALDnEAGGRPAMEPGnGSLDLGGDAAGR	G3XA10	M15(Oxidation); N19(Deamidated)	2997.41	0.002	0.01261	High	0.818978			0
O35114	Lysosome membrane protein 2 OS=Mus musculus GN=Scarb2 PE=1 SV=3 - [SCRB2_MOUSE]	AnIQFGEnGTTISAVTnK	O35114	N8(Deamidated)	1865.93	0	0.0002101	High	0.952203	High	2.82694	0
O88531	Palmitoyl-protein thioesterase 1 OS=Mus musculus GN=Ppt1 PE=2 SV=2 - [PPT1_MOUSE]	nYSIFLADInQER	O88531	N1(Deamidated)	1583.78	0	0.003641			High	1.90697	0
P07759	Serine protease inhibitor A3K OS=Mus musculus GN=Serpina3k PE=1 SV=2 - [SPA3K_MOUSE]	YTGnASALLILPDQGR	P07759	N4(Deamidated)	1689.89	0	1.019e-05	High	2.14597	High	1.58607	0
P08113	Endoplasmin OS=Mus musculus GN=Hsp90b1 PE=1 SV=2 - [ENPL_MOUSE]	EGSRTDDEVVQREEEAIQLDGLnASQIR	P08113	Q11(Deamidated); N23(Deamidated)	3159.52	0.004	0.04995					2
		TDDEVVQREEEAIQLDGLnASQIR	P08113	N19(Deamidated)	2729.34	0	0.005302			High	2.61613	1
P08508	Low affinity immunoglobulin gamma Fc region receptor III OS=Mus musculus GN=Fcgr3 PE=1 SV=1 - [FCGR3_MOUSE]	ATVnDSGEYR	P08508	N4(Deamidated)	1112.49	0	0.03761			High	1.44109	0
P10126	Elongation factor 1-alpha 1 OS=Mus musculus GN=Eef1a1 PE=1 SV=3 - [EF1A1_MOUSE]	VETGVLKPGMVVTFAPVnVTTEVK	P10126	N18(Deamidated)	2516.38	0	0.001325	High	1.72153			0
		IGGIGTVPVGRVETGVLKPGMVVTFAPVnVTTEVK	P10126	M21(Oxidation); N29(Deamidated)	3538.97	0	9.354e-06	High	2.70078			1
P11438	Lysosome-associated membrane glycoprotein 1 OS=Mus musculus GN=Lamp1 PE=1 SV=2 - [LAMP1_MOUSE]	GYLLTLnFTKnTTR	P11438	N7(Deamidated); N11(Deamidated)	1643.87	0	0.0003175	High	1.62562			1
		EnVSDPSLTITFGR	P11438	N2(Deamidated)	1536.76	0	0.02795			High	1.71414	0
P13597-2	Isoform 2 of Intercellular adhesion molecule 1 OS=Mus musculus GN=Icam1 - [ICAM1_MOUSE]	TELDLRPQGLALFSnVSEAR	P13597-2	N15(Deamidated)	2217.16	0	0.00935			High	1.66909	0
P16015	Carbonic anhydrase 3 OS=Mus musculus GN=Ca3 PE=1 SV=3 - [CAH3_MOUSE]	GDnQSPIELHTK	P16015	N3(Deamidated); Q4(Deamidated)	1340.64	0	3.572e-05	High	2.04786			0
		GDnQSPIELHTK	P16015	N3(Deamidated)	1339.66	0	0.0003156	High	2.11733			0
P16627	Heat shock 70 kDa protein 1-like OS=Mus musculus GN=Hspa1l PE=2 SV=4 - [HS71L_MOUSE]	nSTIPTKQTQIFTTYSDnQPGVLIQVYEGER	P16627	N1(Deamidated); N18(Deamidated)	3529.76	0	2.241e-06					1
P23953	Carboxylesterase 1C OS=Mus musculus GN=Ces1c PE=1 SV=4 - [EST1C_MOUSE]	FHSELnISESMIPAVIEQYLR	P23953	N6(Deamidated); M11(Oxidation)	2493.26	0	0.0003728	High	1.83122			0
P24270	Catalase OS=Mus musculus GN=Cat PE=1 SV=4 - [CATA_MOUSE]	FYTEDGnWDLVGnnTPIFFIR	P24270	N13(Deamidated); N14(Deamidated)	2520.19	0.001	0.006311	High	0.924438			0
P24549	Retinal dehydrogenase 1 OS=Mus musculus GN=Aldh1a1 PE=1 SV=5 - [AL1A1_MOUSE]	AnnTTYGLAAGLFTK	P24549	N2(Deamidated); N3(Deamidated)	1543.77	0	1.57e-05	High	1.9976			0
P29788	Vitronectin OS=Mus musculus GN=Vtn PE=1 SV=2 - [VTNC_MOUSE]	nISEGFSGIPDnVDAAFALPAHR	P29788	N1(Deamidated)	2399.17	0	0.007453			High	2.3283	0
P31809-2	Isoform Short of Carcinoembryonic antigen-related cell adhesion molecule 1 OS=Mus musculus GN=Ceacam1 - [CEAM1_MOUSE]	TLTLLnVTR	P31809-2	N6(Deamidated)	1031.61	0	0.159			High	0.981094	0
		nDTGPYVCETR	P31809-2	N1(Deamidated); C8(Carbamidomethyl)	1312.55	0	0.05806			High	0.985002	0
		FVPnSnMnFTGQAYSGR	P31809-2;P31809-3	M7(Oxidation); N8(Deamidated)	1906.85	0	4.231e-05	High	1.54057			0
		MTLSQnnSILR	P31809-2;P31809-3	M1(Oxidation); N6(Deamidated)	1293.65	0	0.0001591	High	2.23221	High	2.1685	0
P31809-3	Isoform 3 of Carcinoembryonic antigen-related cell adhesion molecule 1 OS=Mus musculus GN=Ceacam1 - [CEAM1_MOUSE]	FHVHQPVTQPFLQVTnTTVK	P31809-3	N16(Deamidated)	2322.23	0	0.036			High	2.67778	0
P47738	Aldehyde dehydrogenase, mitochondrial OS=Mus musculus GN=Aldh2 PE=1 SV=1 - [ALDH2_MOUSE]	AnDSKYGLAAAVFTK	P47738	N2(Deamidated)	1556.8	0	7.314e-06	High	2.32249			1
P63038	60 kDa heat shock protein, mitochondrial OS=Mus musculus GN=Hspd1 PE=1 SV=1 - [CH60_MOUSE]	VTDALnATR	P63038	N6(Deamidated)	961.5	0	0.0001362	High	1.44922			0
P70194	C-type lectin domain family 4 member F OS=Mus musculus GN=Clec4f PE=2 SV=1 - [CLC4F_MOUSE]	SSTEnTSAELHVLGR	P70194	N5(Deamidated)	1601.78	0	0.04541			High	1.3945	0
P99027	60S acidic ribosomal protein P2 OS=Mus musculus GN=Rplp2 PE=1 SV=3 - [RLA2_MOUSE]	MRYVASYLLAALGGnSSPSAK	P99027	M1(Oxidation); N15(Deamidated)	2173.11	0.002	0.01321	High	1.46379			1
Q00896	Alpha-1-antitrypsin 1-3 OS=Mus musculus GN=Serpina1c PE=1 SV=2 - [A1AT3_MOUSE]	GDTHTQILEGLQFnLTQTSEADIHK	Q00896	N14(Deamidated)	2797.38	0	5.75584e-06			High	3.7737	0
Q07797	Galectin-3-binding protein OS=Mus musculus GN=Lgals3bp PE=1 SV=1 - [LG3BP_MOUSE]	ALGYEnATQALGR	Q07797	N6(Deamidated)	1364.69	0	3.401e-05			High	2.46088	0
		GLnLTEDTYKPR	Q07797	N3(Deamidated)	1407.72	0	0.01899			High	1.74202	0
Q3TJI8	Corticosteroid 11-beta-dehydrogenase isozyme 1 OS=Mus musculus GN=Hsd11b1 PE=2 SV=1 - [Q3TJI8_MOUSE]	QSnGSIAVISSLAGK	Q3TJI8	N3(Deamidated)	1432.78	0	0.0001827	High	1.98724	High	1.06138	0
Q5MPX5	Activated leukocyte cell adhesion molecule soluble isoform OS=Mus musculus GN=Alcam PE=2 SV=1 - [Q5MPX5_MOUSE]	LSLSEnYTLSIAnAK	Q5MPX5	N6(Deamidated)	1624.85	0	0.005166			High	1.58777	0
Q61425	Hydroxyacyl-coenzyme A dehydrogenase, mitochondrial OS=Mus musculus GN=Hadh PE=1 SV=2 - [HCDH_MOUSE]	LDKFAAEHTIFASnTSSLQITnIAnATTR	Q61425	N14(Deamidated)	3136.6	0	0.001657	High	1.76613			1
Q63886	UDP-glucuronosyltransferase 1-1 OS=Mus musculus GN=Ugt1a1 PE=2 SV=2 - [UD11_MOUSE]	EnVTATLVELGR	Q63886	N2(Deamidated)	1302.7	0	0.002005	High	2.31636	High	2.76627	0
		KFPVPFQKEnVTATLVELGR	Q63886	N10(Deamidated)	2274.26	0	2.046e-08	High	3.47314			2
Q6IFZ6	Keratin, type II cytoskeletal 1b OS=Mus musculus GN=Krt77 PE=1 SV=1 - [K2C1B_MOUSE]	WELLQQVnTSTR	Q6IFZ6	N8(Deamidated)	1475.75	0	1.602e-05	High	2.52976			0
Q6IFZ6		FLEQQnQVLQTKWELLQQVnTSTR	Q6IFZ6	N20(Deamidated)	2932.52	0	1.476e-07	High	2.17794			1
Q8BWQ1	UDP-glucuronosyltransferase 2A3 OS=Mus musculus GN=Ugt2a3 PE=1 SV=1 - [UD2A3_MOUSE]	nLTEEKAnLIASVLAQIPQK	Q8BWQ1	N1(Deamidated)	2181.22	0	0.000628	High	1.65007			1
Q8BWT1	3-ketoacyl-CoA thiolase, mitochondrial OS=Mus musculus GN=Acaa2 PE=1 SV=3 - [THIM_MOUSE]	DGTVTAGnASGVSDGAGAVIIASEDAVKKHnFTPLAR	Q8BWT1	N8(Deamidated)	3597.84	0.004	0.07365					2
		DGTVTAGnASGVSDGAGAVIIASEDAVKK	Q8BWT1	N8(Deamidated)	2661.33	0	1.004e-05	High	2.39015			1
		DGTVTAGnASGVSDGAGAVIIASEDAVK	Q8BWT1	N8(Deamidated)	2533.25	0	0.0001961	High	1.84786			0
		ALDLDPSKTnVSGGAIALGHPLGGSGSR	Q8BWT1	N10(Deamidated)	2648.38	0	1.415e-05	High	2.29486			1
Q8C165	Probable carboxypeptidase PM20D1 OS=Mus musculus GN=Pm20d1 PE=2 SV=1 - [P20D1_MOUSE]	GAIQIPTVSFSHEESnTTALAEFGEYIR	Q8C165	N16(Deamidated)	3068.5	0	0.06094			High	0.465877	0
Q8C196	Carbamoyl-phosphate synthase [ammonia], mitochondrial OS=Mus musculus GN=Cps1 PE=1 SV=2 - [CPSM_MOUSE]	VFGKGnPTK	Q8C196	N6(Deamidated)	948.519	0.004	0.03261	High	1.62507			1
		ALEnnMSLDEIVR	Q8C196	N5(Deamidated); M6(Oxidation)	1520.73	0	3.186e-06	High	3.25059			0
		ALEnnMSLDEIVR	Q8C196	N4(Deamidated); N5(Deamidated); M6(Oxidation)	1521.72	0	8.335e-05	High	2.12766			0
		GQnQPVLnITnR	Q8C196	N11(Deamidated)	1354.71	0	2.207e-06	High	3.29547			0
Q8CIF4	Biotinidase OS=Mus musculus GN=Btd PE=1 SV=2 - [BTD_MOUSE]	GVQIIVFPEDGIHGFnFTR	Q8CIF4	N16(Deamidated)	2147.09	0.001	0.005182	High	1.35504			0
		YQFnTnVVFSDnGTLVDR	Q8CIF4	N12(Deamidated)	2089.99	0	0.1074			High	0.847883	0
Q8QZR3	Pyrethroid hydrolase Ces2a OS=Mus musculus GN=Ces2a PE=1 SV=1 - [EST2A_MOUSE]	TVAnLSGCEATDSEALIHCLR	Q8QZR3	N4(Deamidated); C8(Carbamidomethyl); C19(Carbamidomethyl)	2318.08	0	0.03862			High	0.987597	0
Q8R0Y6	Cytosolic 10-formyltetrahydrofolate dehydrogenase OS=Mus musculus GN=Aldh1l1 PE=1 SV=1 - [AL1L1_MOUSE]	AnATEFGLASGVFTR	Q8R0Y6	N2(Deamidated)	1541.77	0	4.539e-08	High	3.63135			0
Q8R5M8-5	Isoform 5 of Cell adhesion molecule 1 OS=Mus musculus GN=Cadm1 - [CADM1_MOUSE]	VSLTnVSISDEGR	Q8R5M8-5	N5(Deamidated)	1377.69	0	0.04091			High	0.983802	0
		FQLLnFSSSELK	Q8R5M8-5	N5(Deamidated)	1413.73	0	0.1179			High	0.964185	0
Q8VBZ3	Cleft lip and palate transmembrane protein 1 homolog OS=Mus musculus GN=Clptm1 PE=2 SV=1 - [CLPT1_MOUSE]	DYYPInESLASLPLR	Q8VBZ3	N6(Deamidated)	1751.89	0	0.0422			High	1.1572	0
Q8VCT4	Carboxylesterase 1D OS=Mus musculus GN=Ces1d PE=1 SV=1 - [CES1D_MOUSE]	nTTSYPPMCSQDAVGGQVLSELFTnR	Q8VCT4	N1(Deamidated); M8(Oxidation); C9(Carbamidomethyl)	2889.32	0	0.0009449			High	2.02673	0
Q91ZX7	Prolow-density lipoprotein receptor-related protein 1 OS=Mus musculus GN=Lrp1 PE=1 SV=1 - [LRP1_MOUSE]	IETILLnGTDR	Q91ZX7	N7(Deamidated)	1245.67	0	0.005129			High	2.11904	0
		DnATDSVPLR	Q91ZX7	N2(Deamidated)	1088.53	0	0.006287			High	1.81006	0
		FnSTEYQVVTR	Q91ZX7	N2(Deamidated)	1344.65	0	0.0004423			High	2.11861	0
Q921H8;Q8VCH0	3-ketoacyl-CoA thiolase A, peroxisomal OS=Mus musculus GN=Acaa1a PE=1 SV=1 - [THIKA_MOUSE]	DGGSTTAGnSSQVSDGAAAVLLAR	Q921H8;Q8VCH0	N9(Deamidated)	2206.07	0	0.007395			High	1.32088	0
Q9CY50	Translocon-associated protein subunit alpha OS=Mus musculus GN=Ssr1 PE=1 SV=1 - [SSRA_MOUSE]	DLnGnVFQDAVFnQTVTVIER	Q9CY50	N3(Deamidated); N5(Deamidated)	2381.17	0	0.02198			High	2.0705	0
Q9DBT9	Dimethylglycine dehydrogenase, mitochondrial OS=Mus musculus GN=Dmgdh PE=1 SV=1 - [M2GD_MOUSE]	GGYDVEIQnITDEFGVLGVAGPYAR	Q9DBT9	N9(Deamidated)	2641.28	0.003	0.02598	High	0.962355			0
Q9EQ20	Methylmalonate-semialdehyde dehydrogenase [acylating], mitochondrial OS=Mus musculus GN=Aldh6a1 PE=1 SV=1 - [MMSA_MOUSE]	IVnDnPYGnGTAIFTTnGATAR	Q9EQ20	N9(Deamidated); N17(Deamidated)	2269.08	0	2.086e-06	High	2.09211			0
Q9ET30	Transmembrane 9 superfamily member 3 OS=Mus musculus GN=Tm9sf3 PE=1 SV=1 - [TM9S3_MOUSE]	IVDVnLTSEGK	Q9ET30	N5(Deamidated)	1175.62	0	0.003762			High	1.78562	0
Q9JKR6	Hypoxia up-regulated protein 1 OS=Mus musculus GN=Hyou1 PE=1 SV=1 - [HYOU1_MOUSE]	VFGSQnLTTVK	Q9JKR6	N6(Deamidated)	1194.64	0	0.0001427	High	1.54551			0
